# Supplementary material for: Prediction of chronological and biological age from laboratory data
Source: PubMed Central journal article supplement (PMC7244024; doi:10.18632/aging.102900), 2020-05-05

**Supplementary Figure 1.** Piecewise linear regression plots for 342 laboratory analytes with lines representing linear regression on either side of the breakpoint.

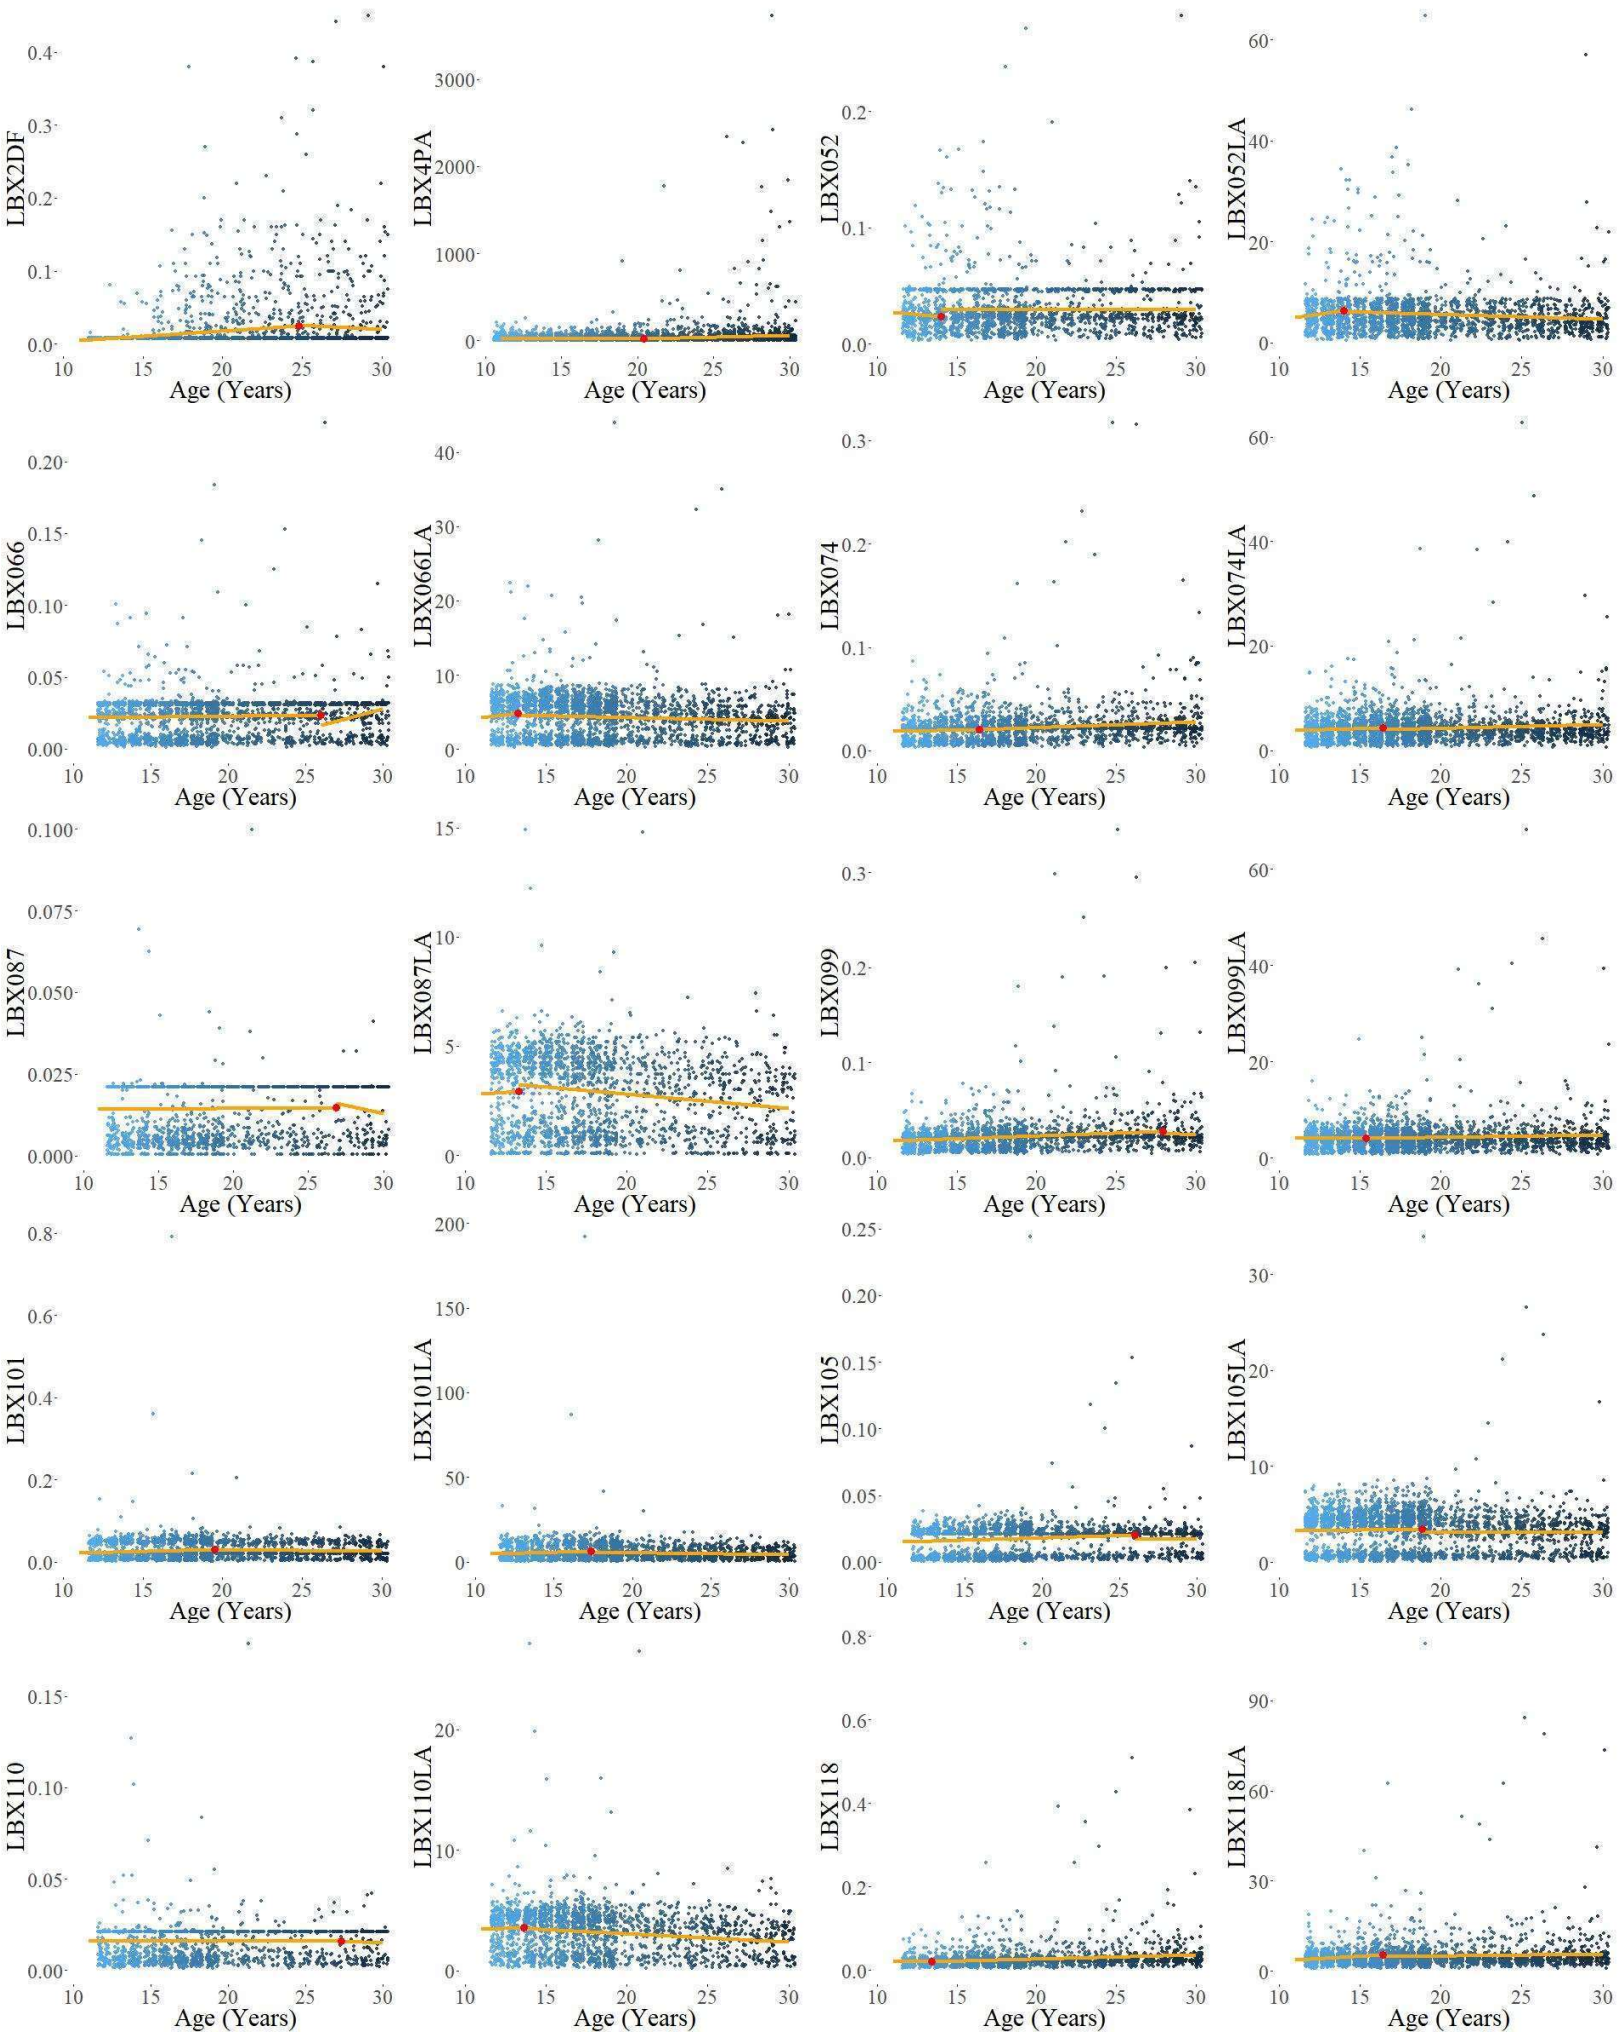



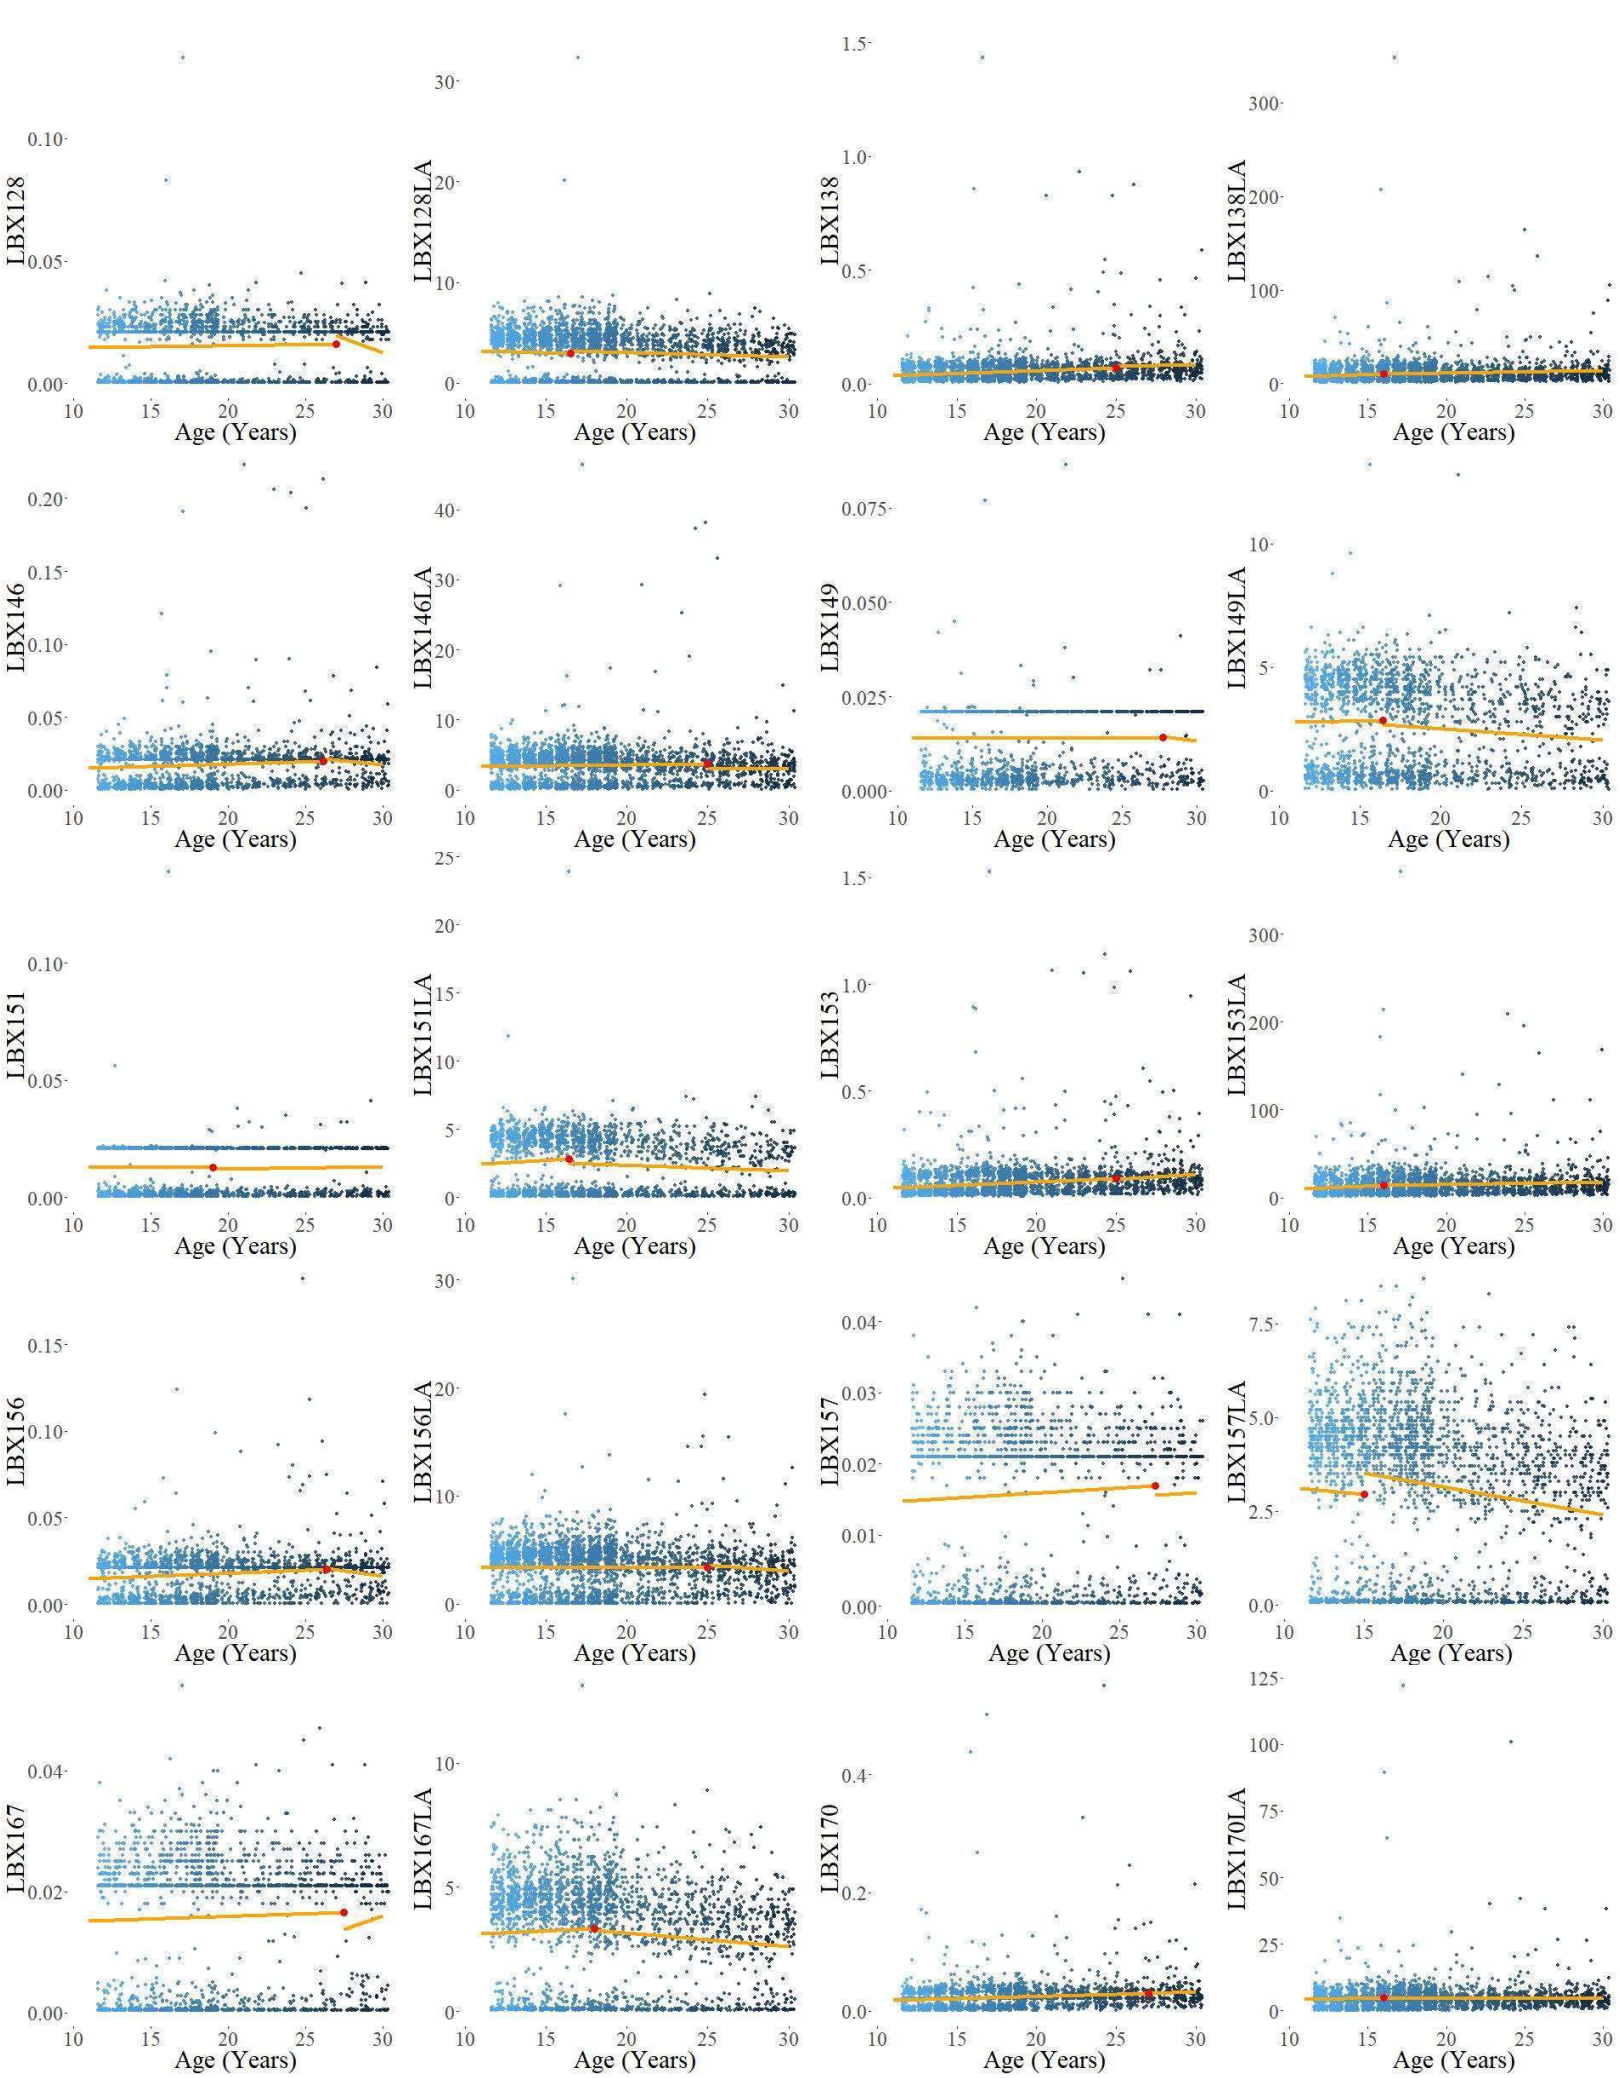

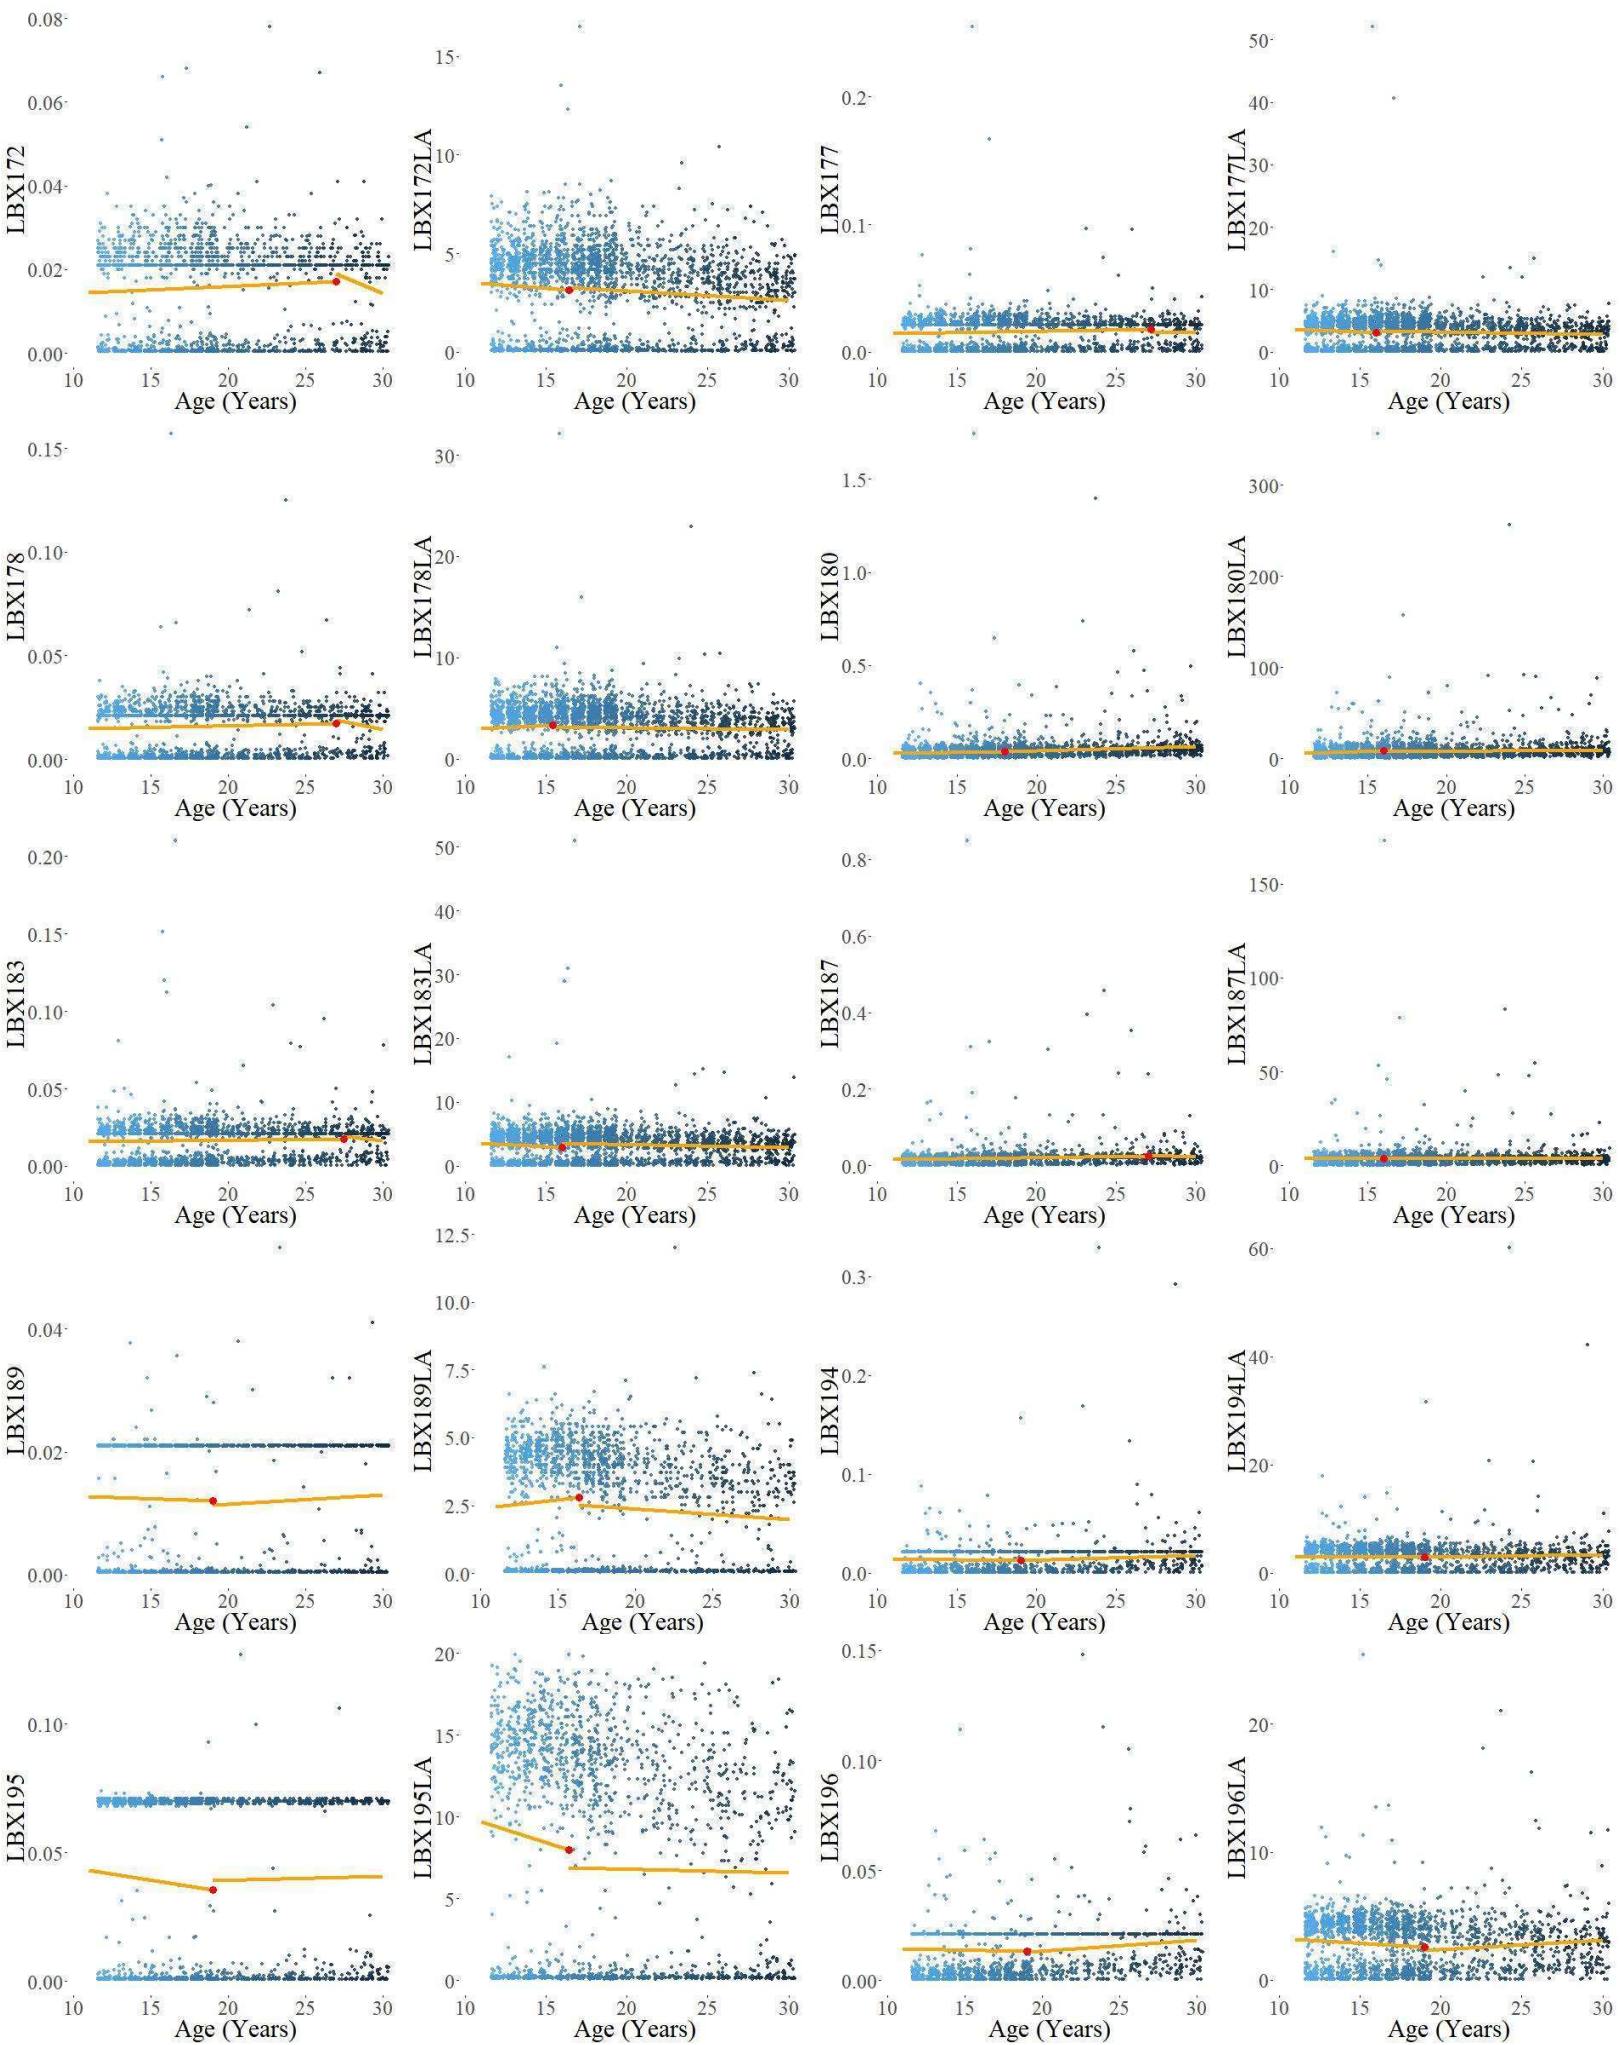



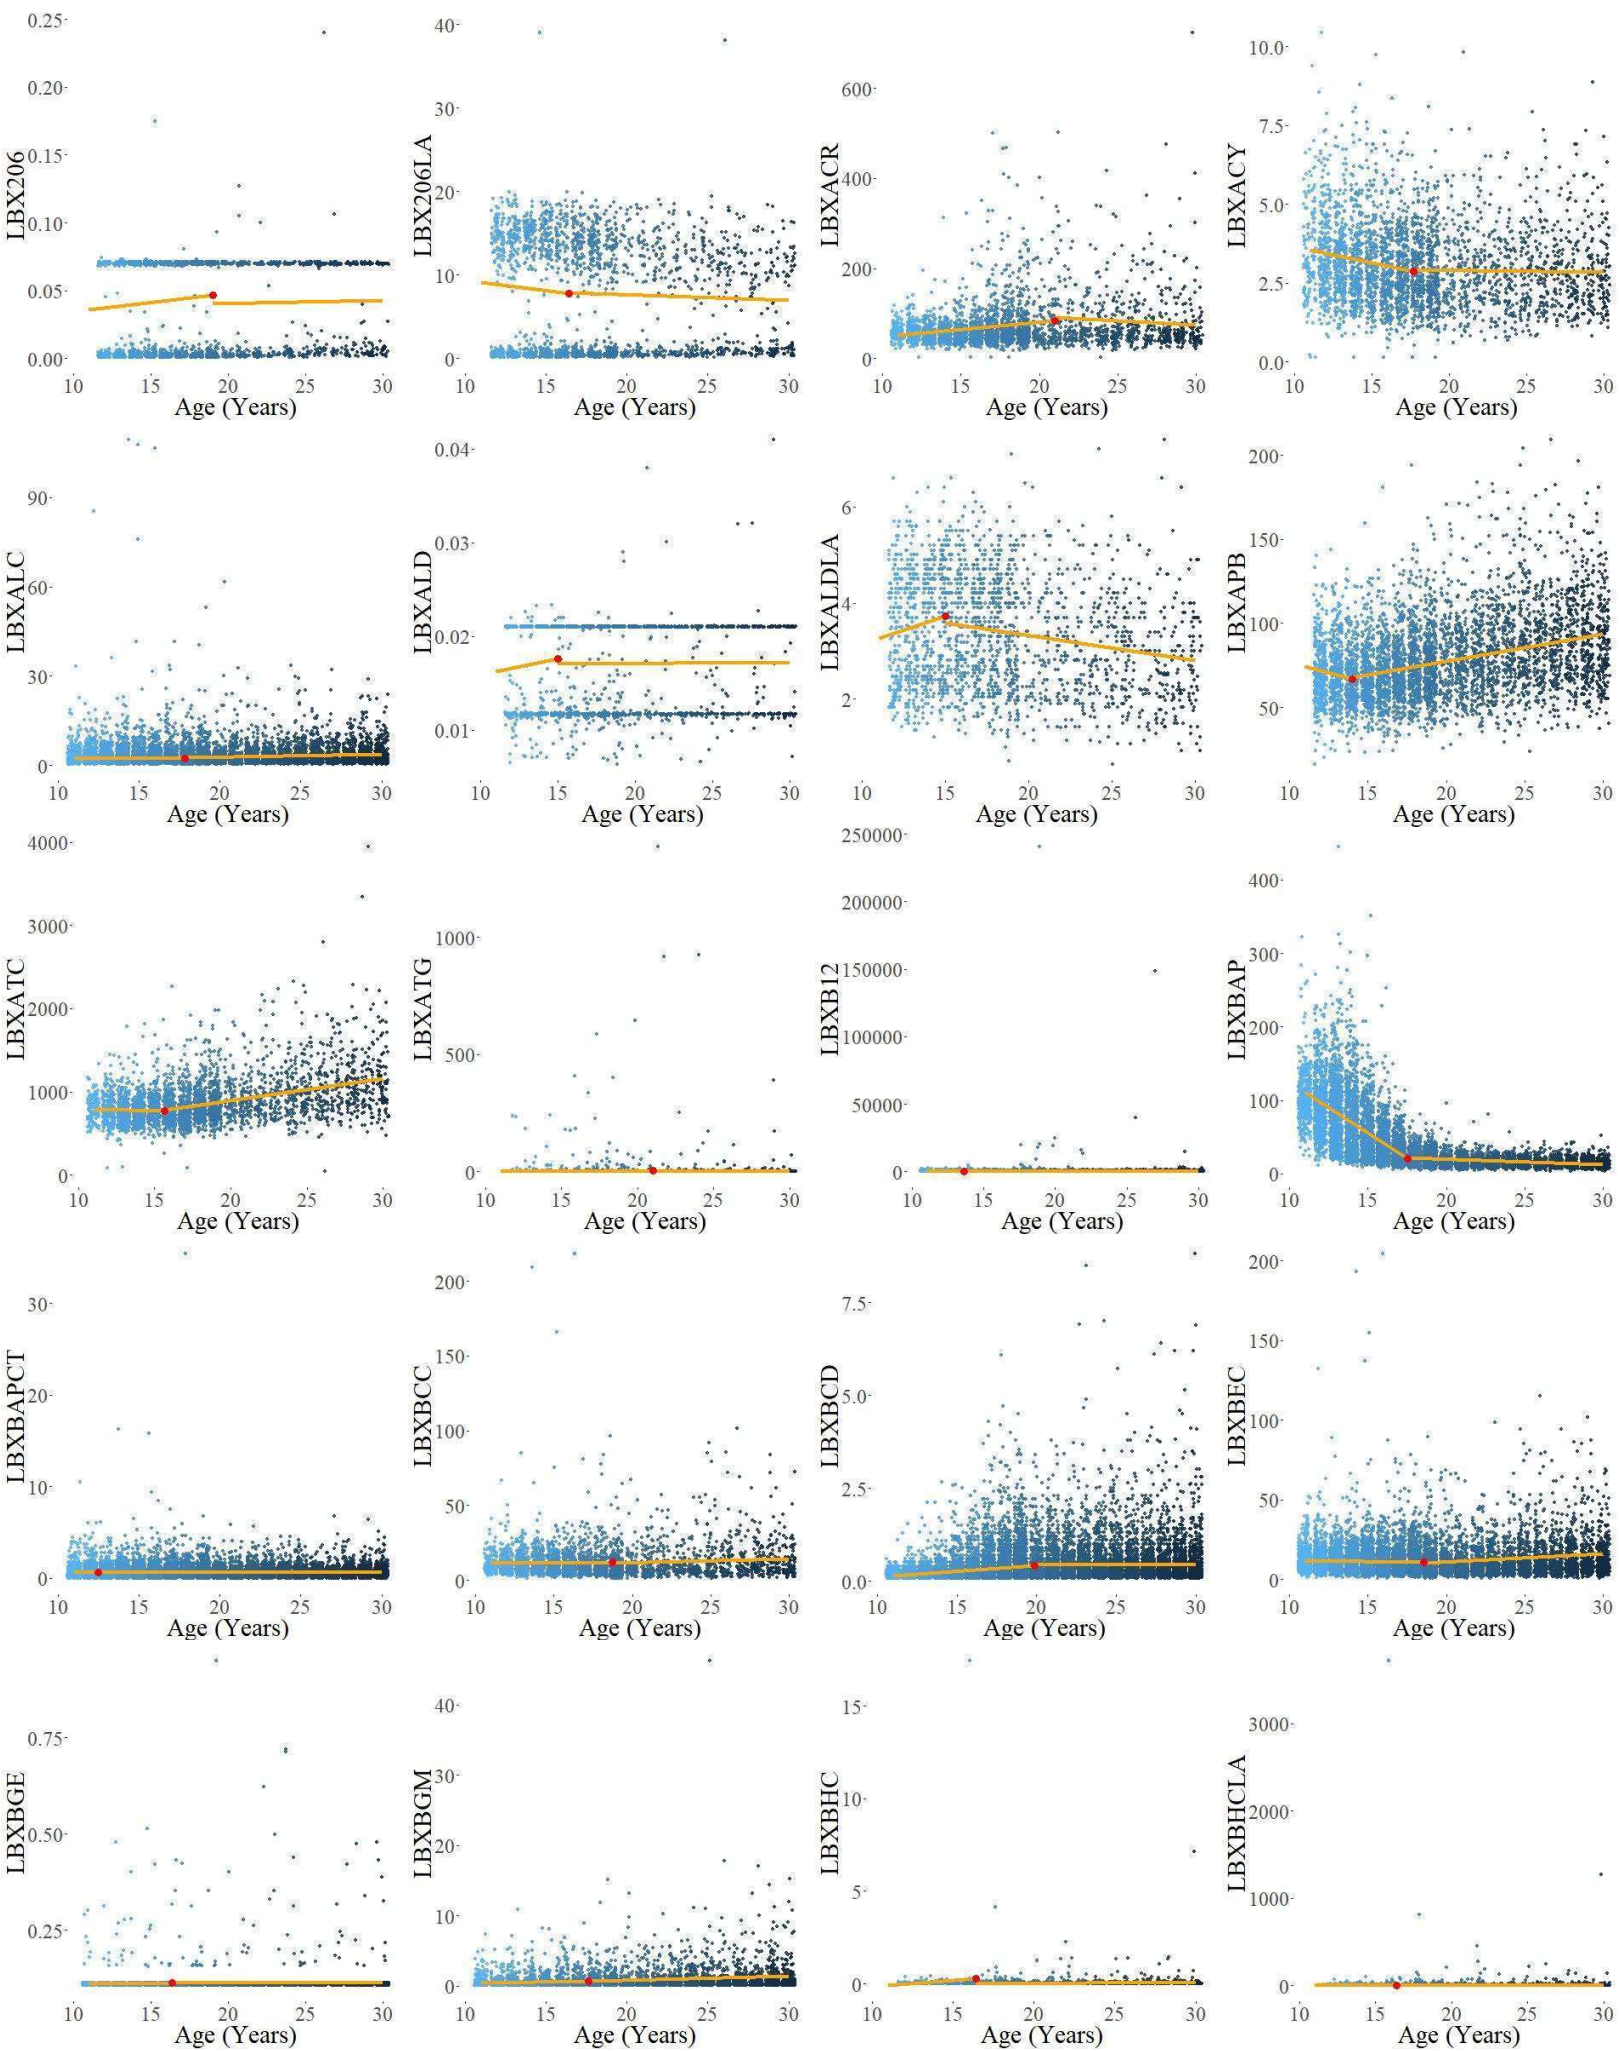

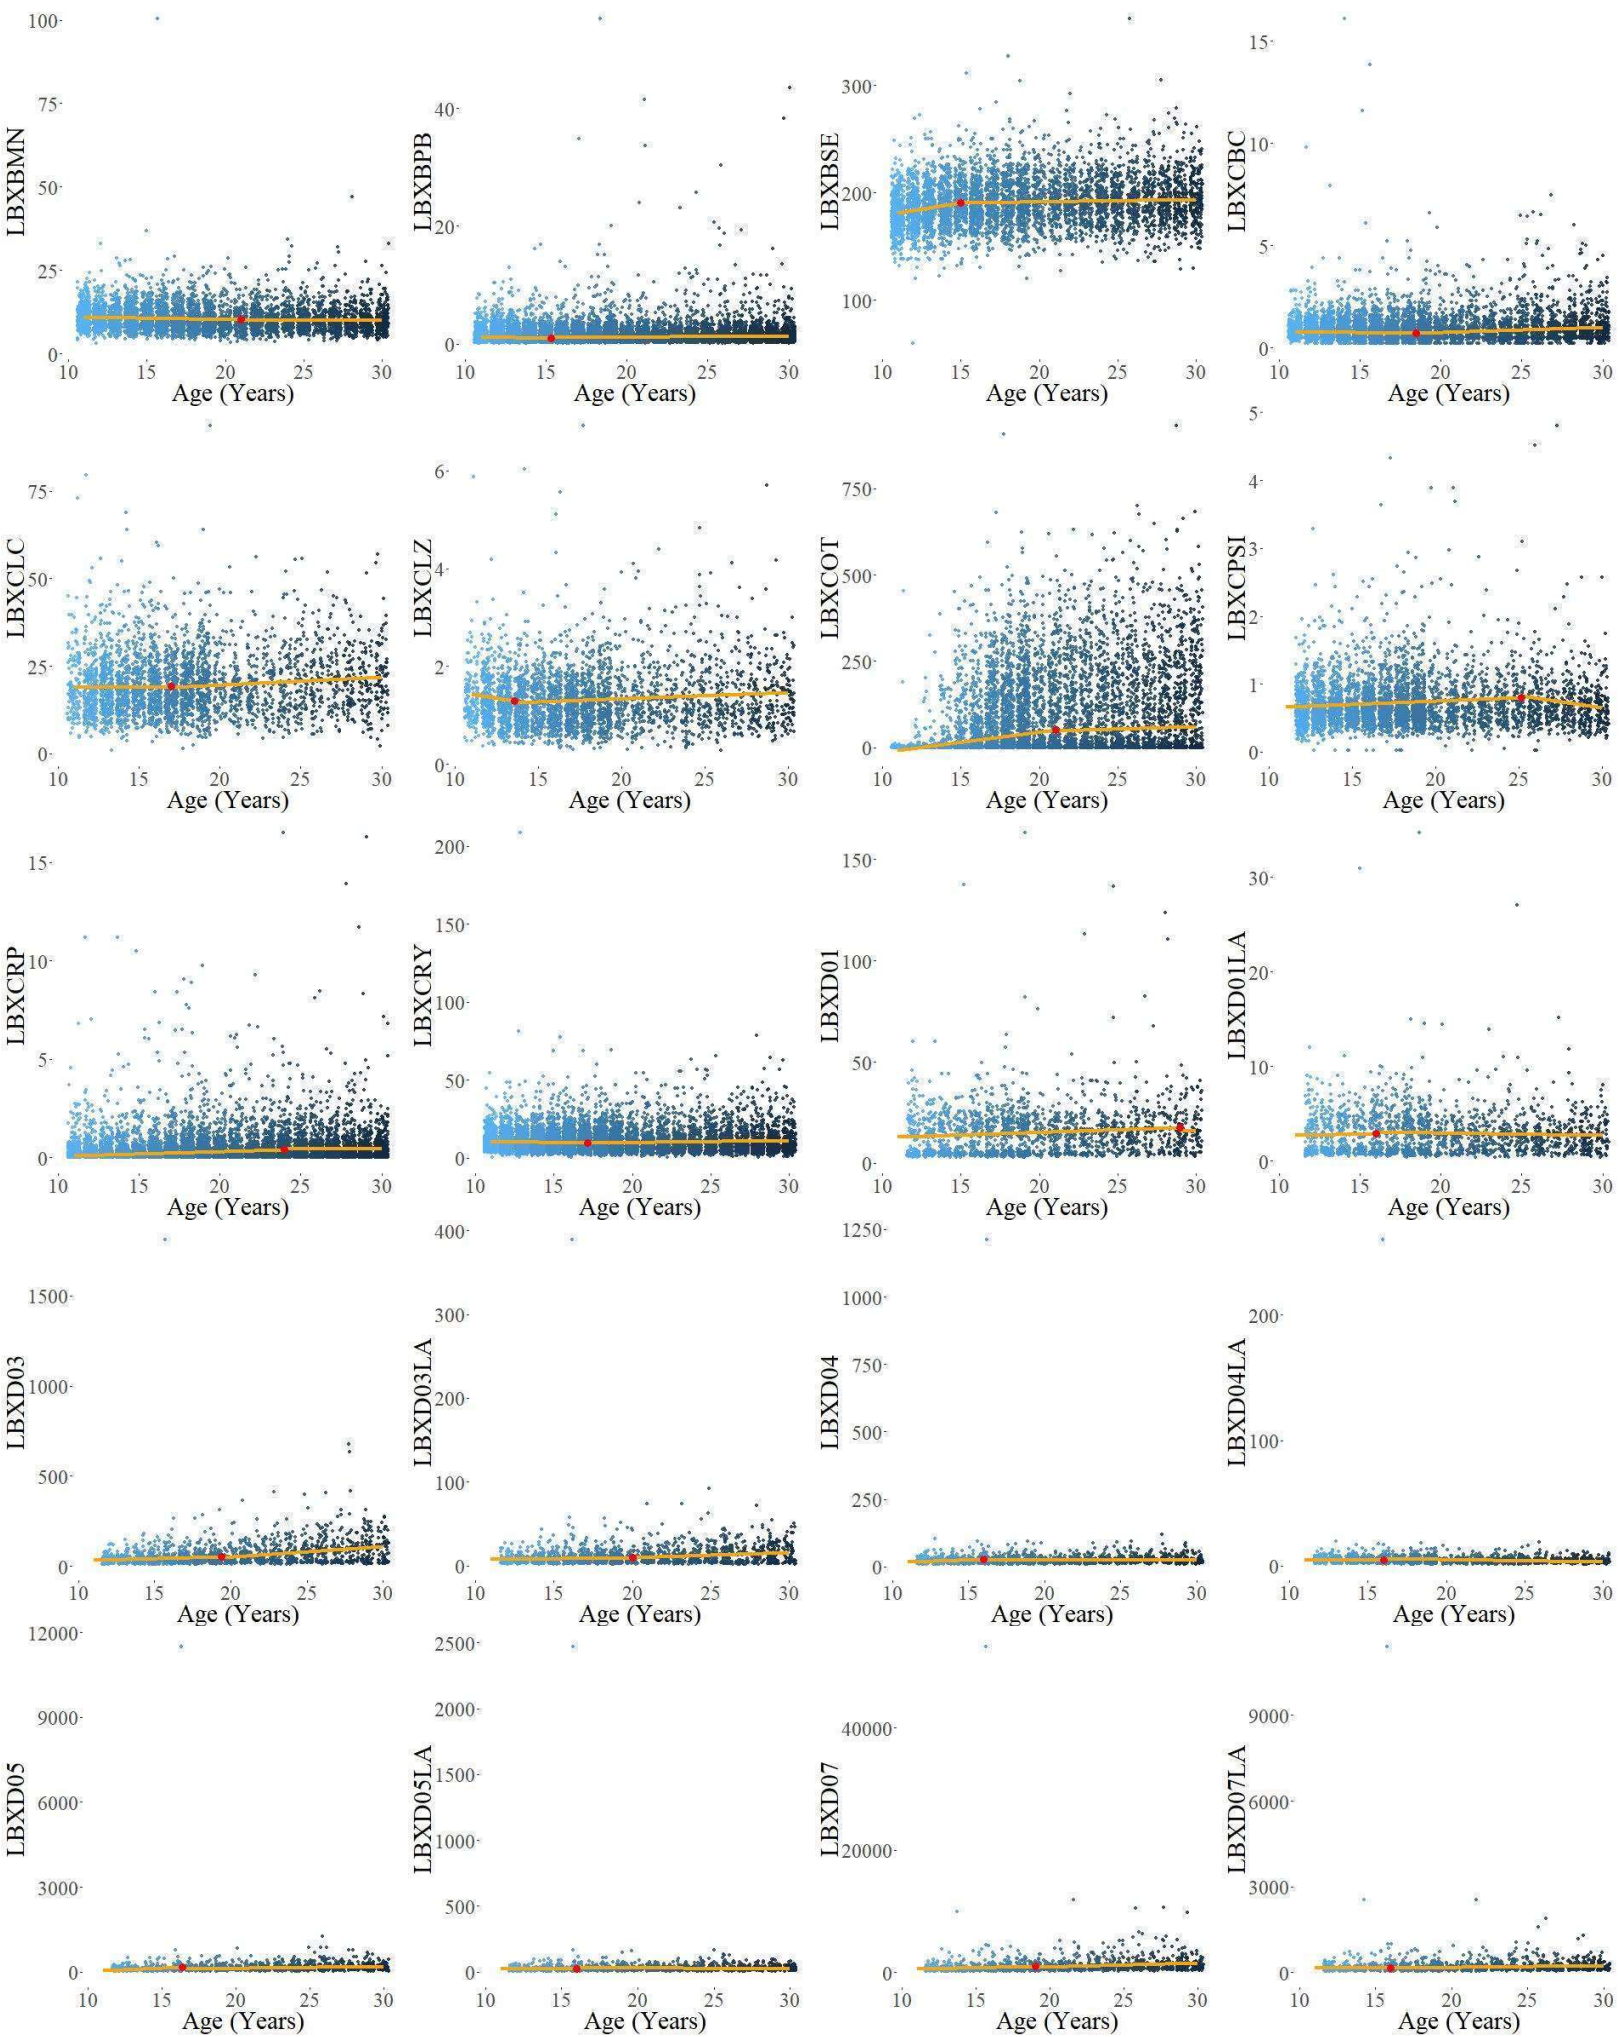



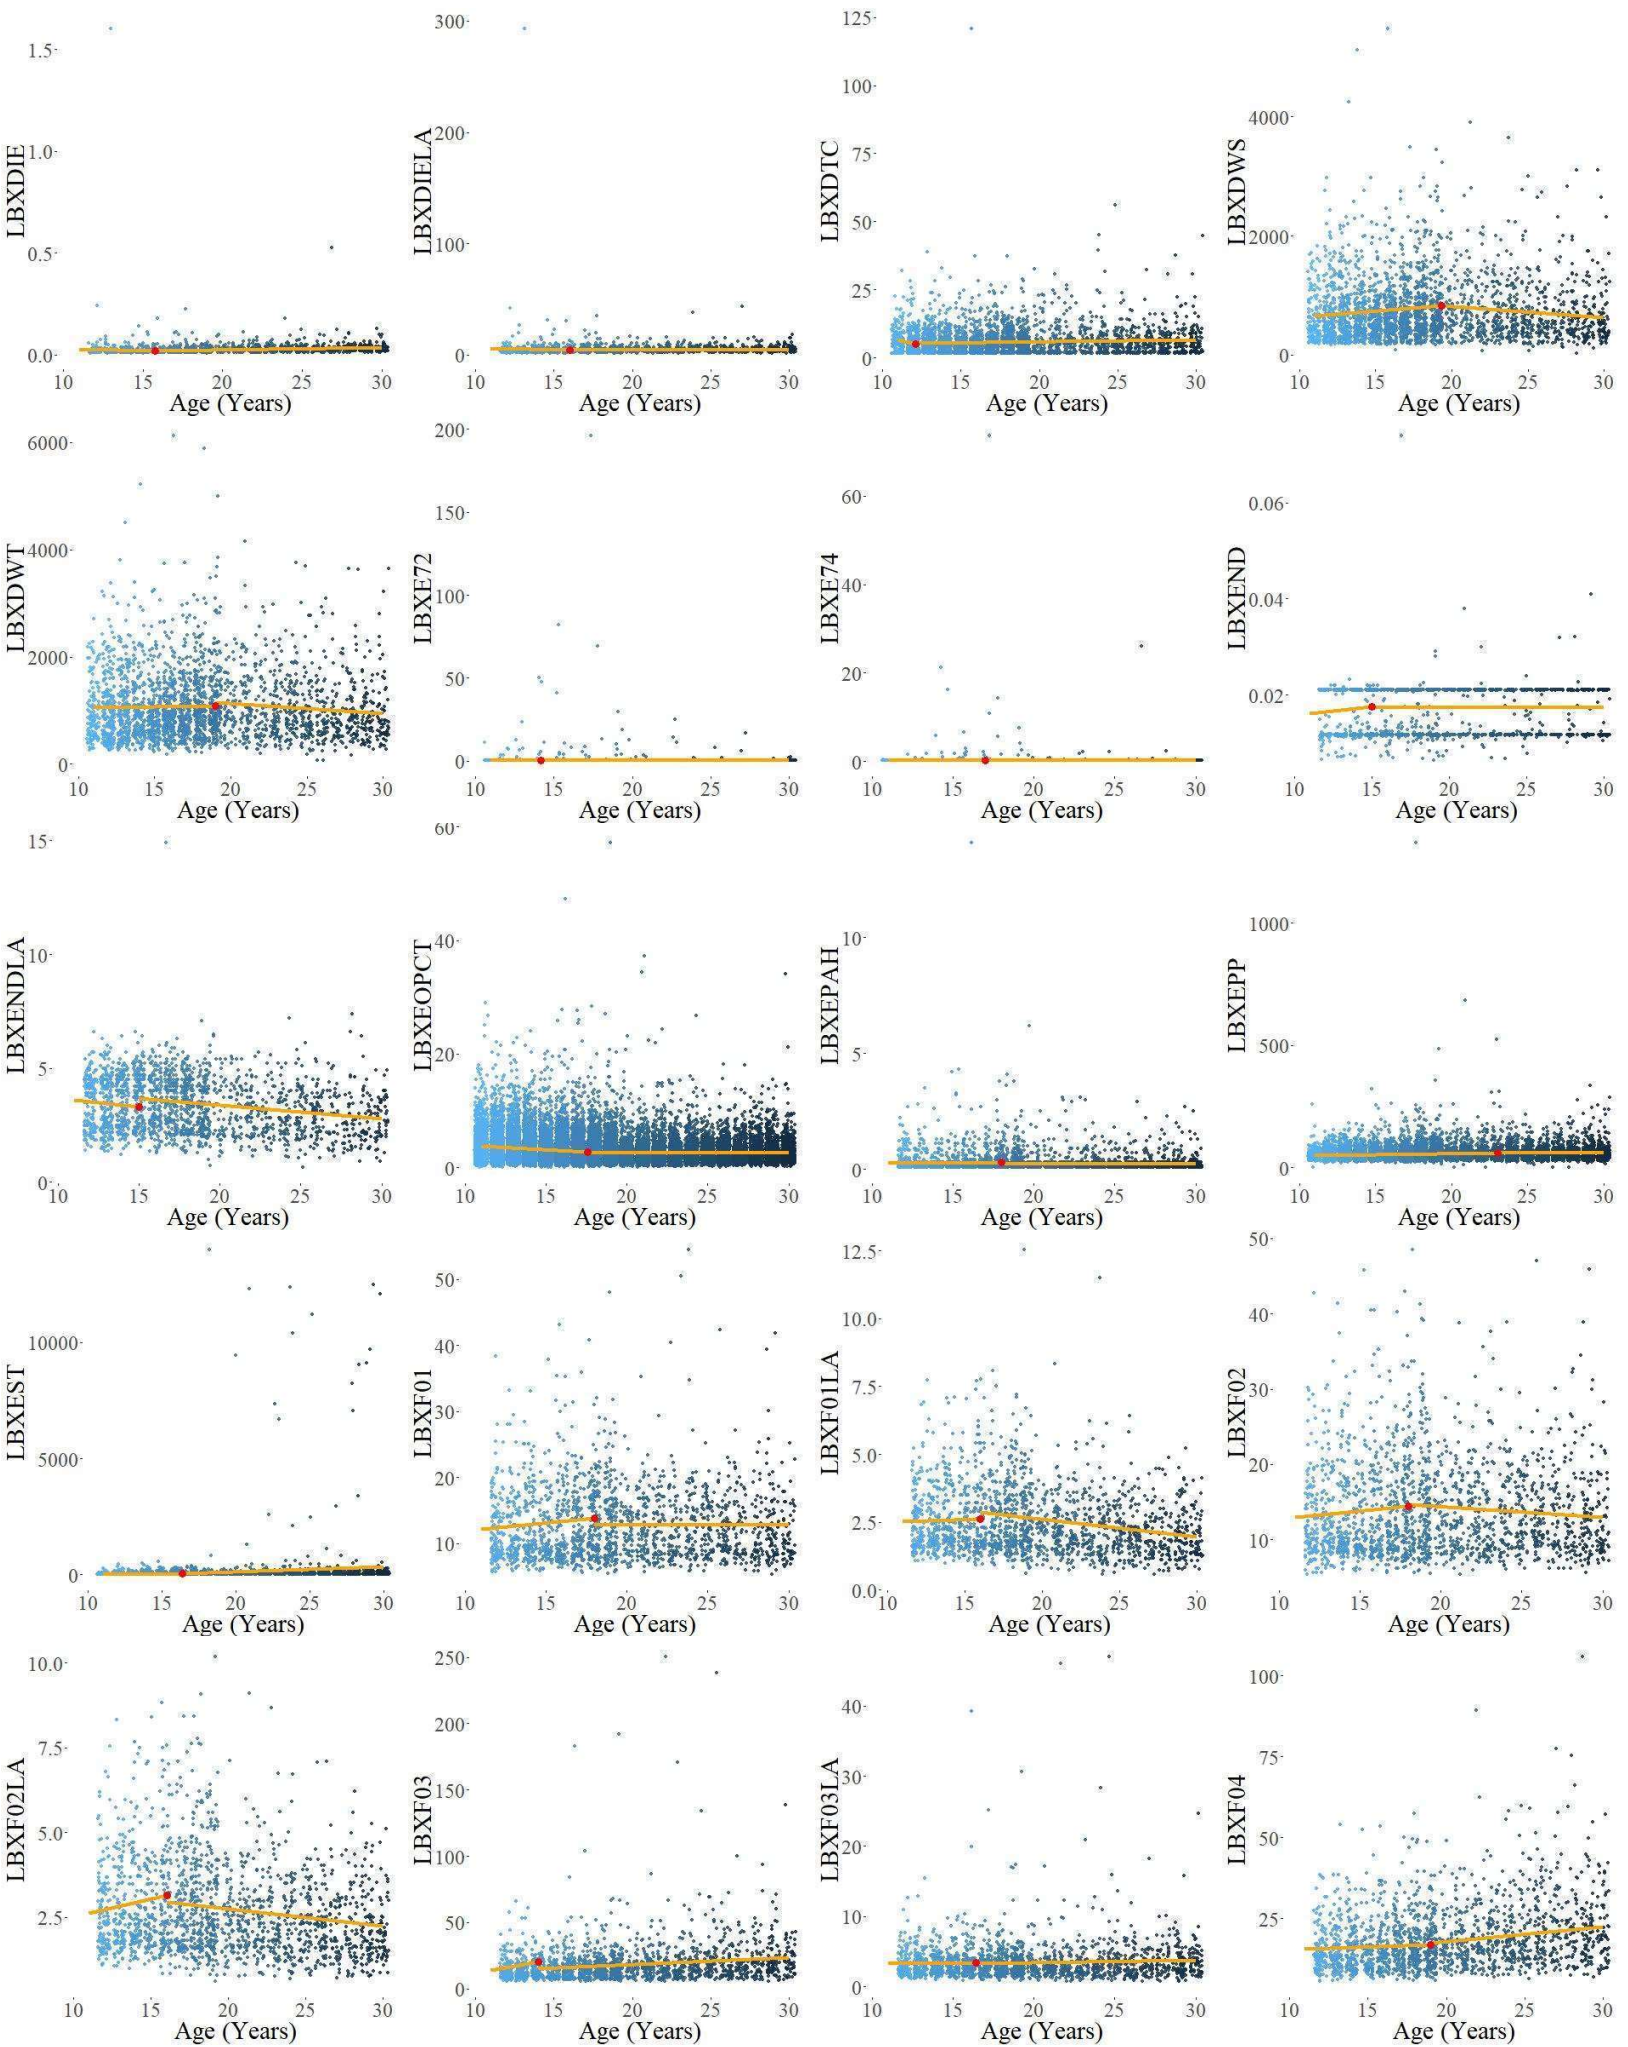

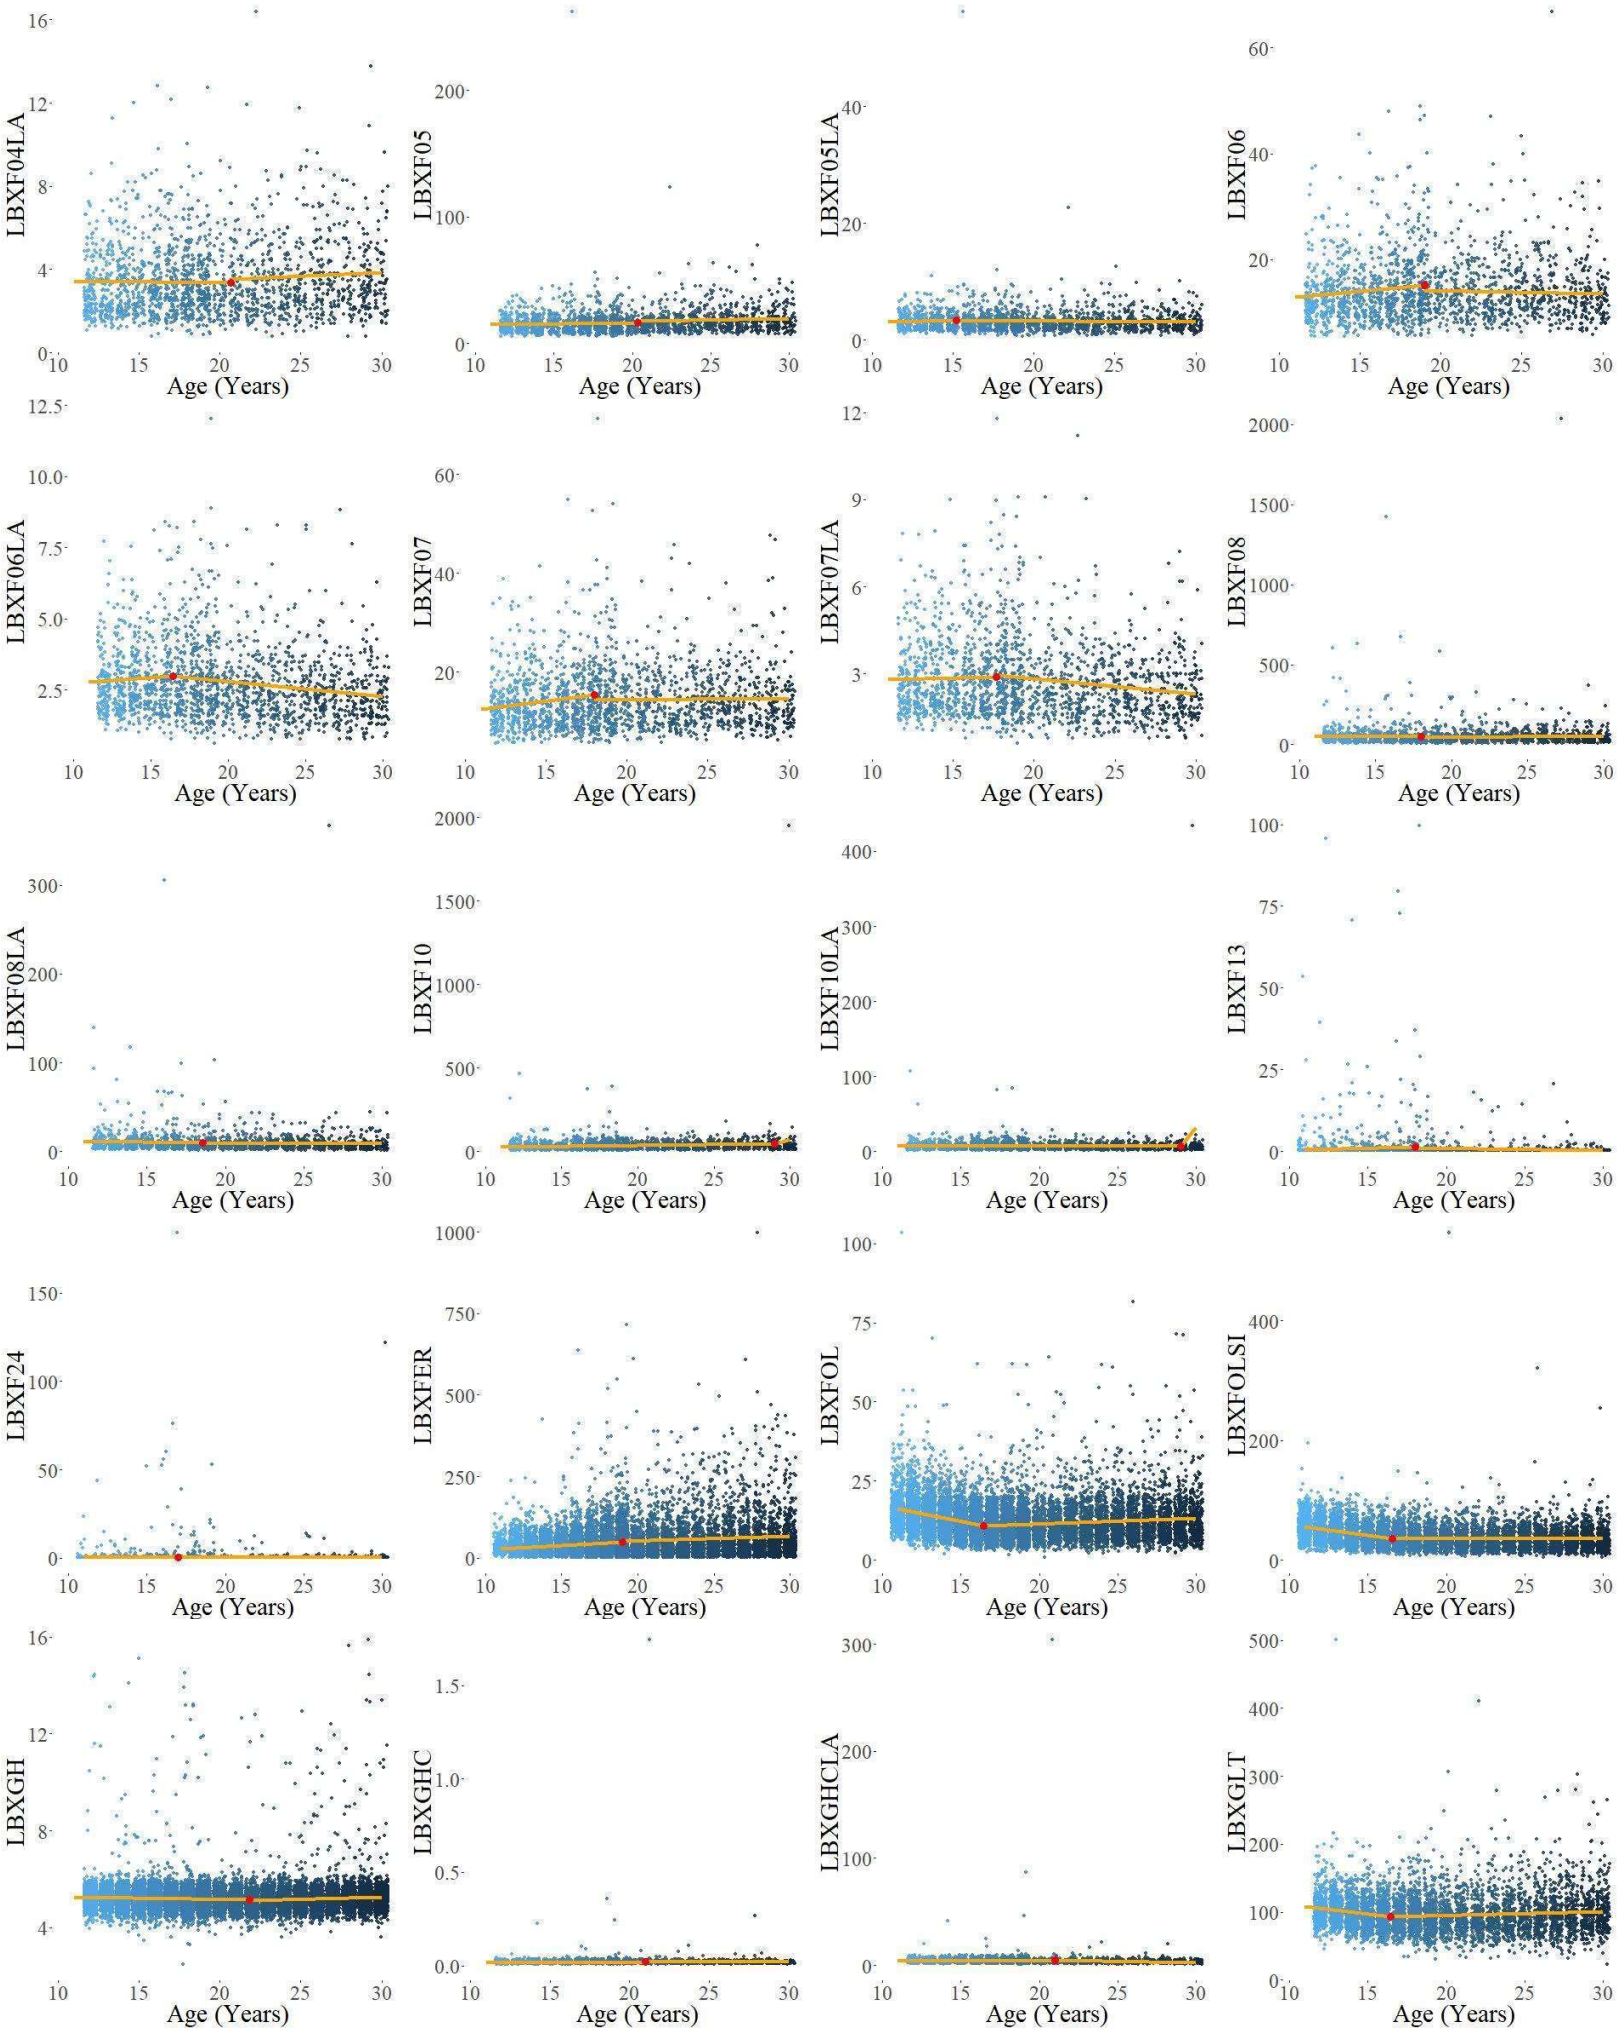



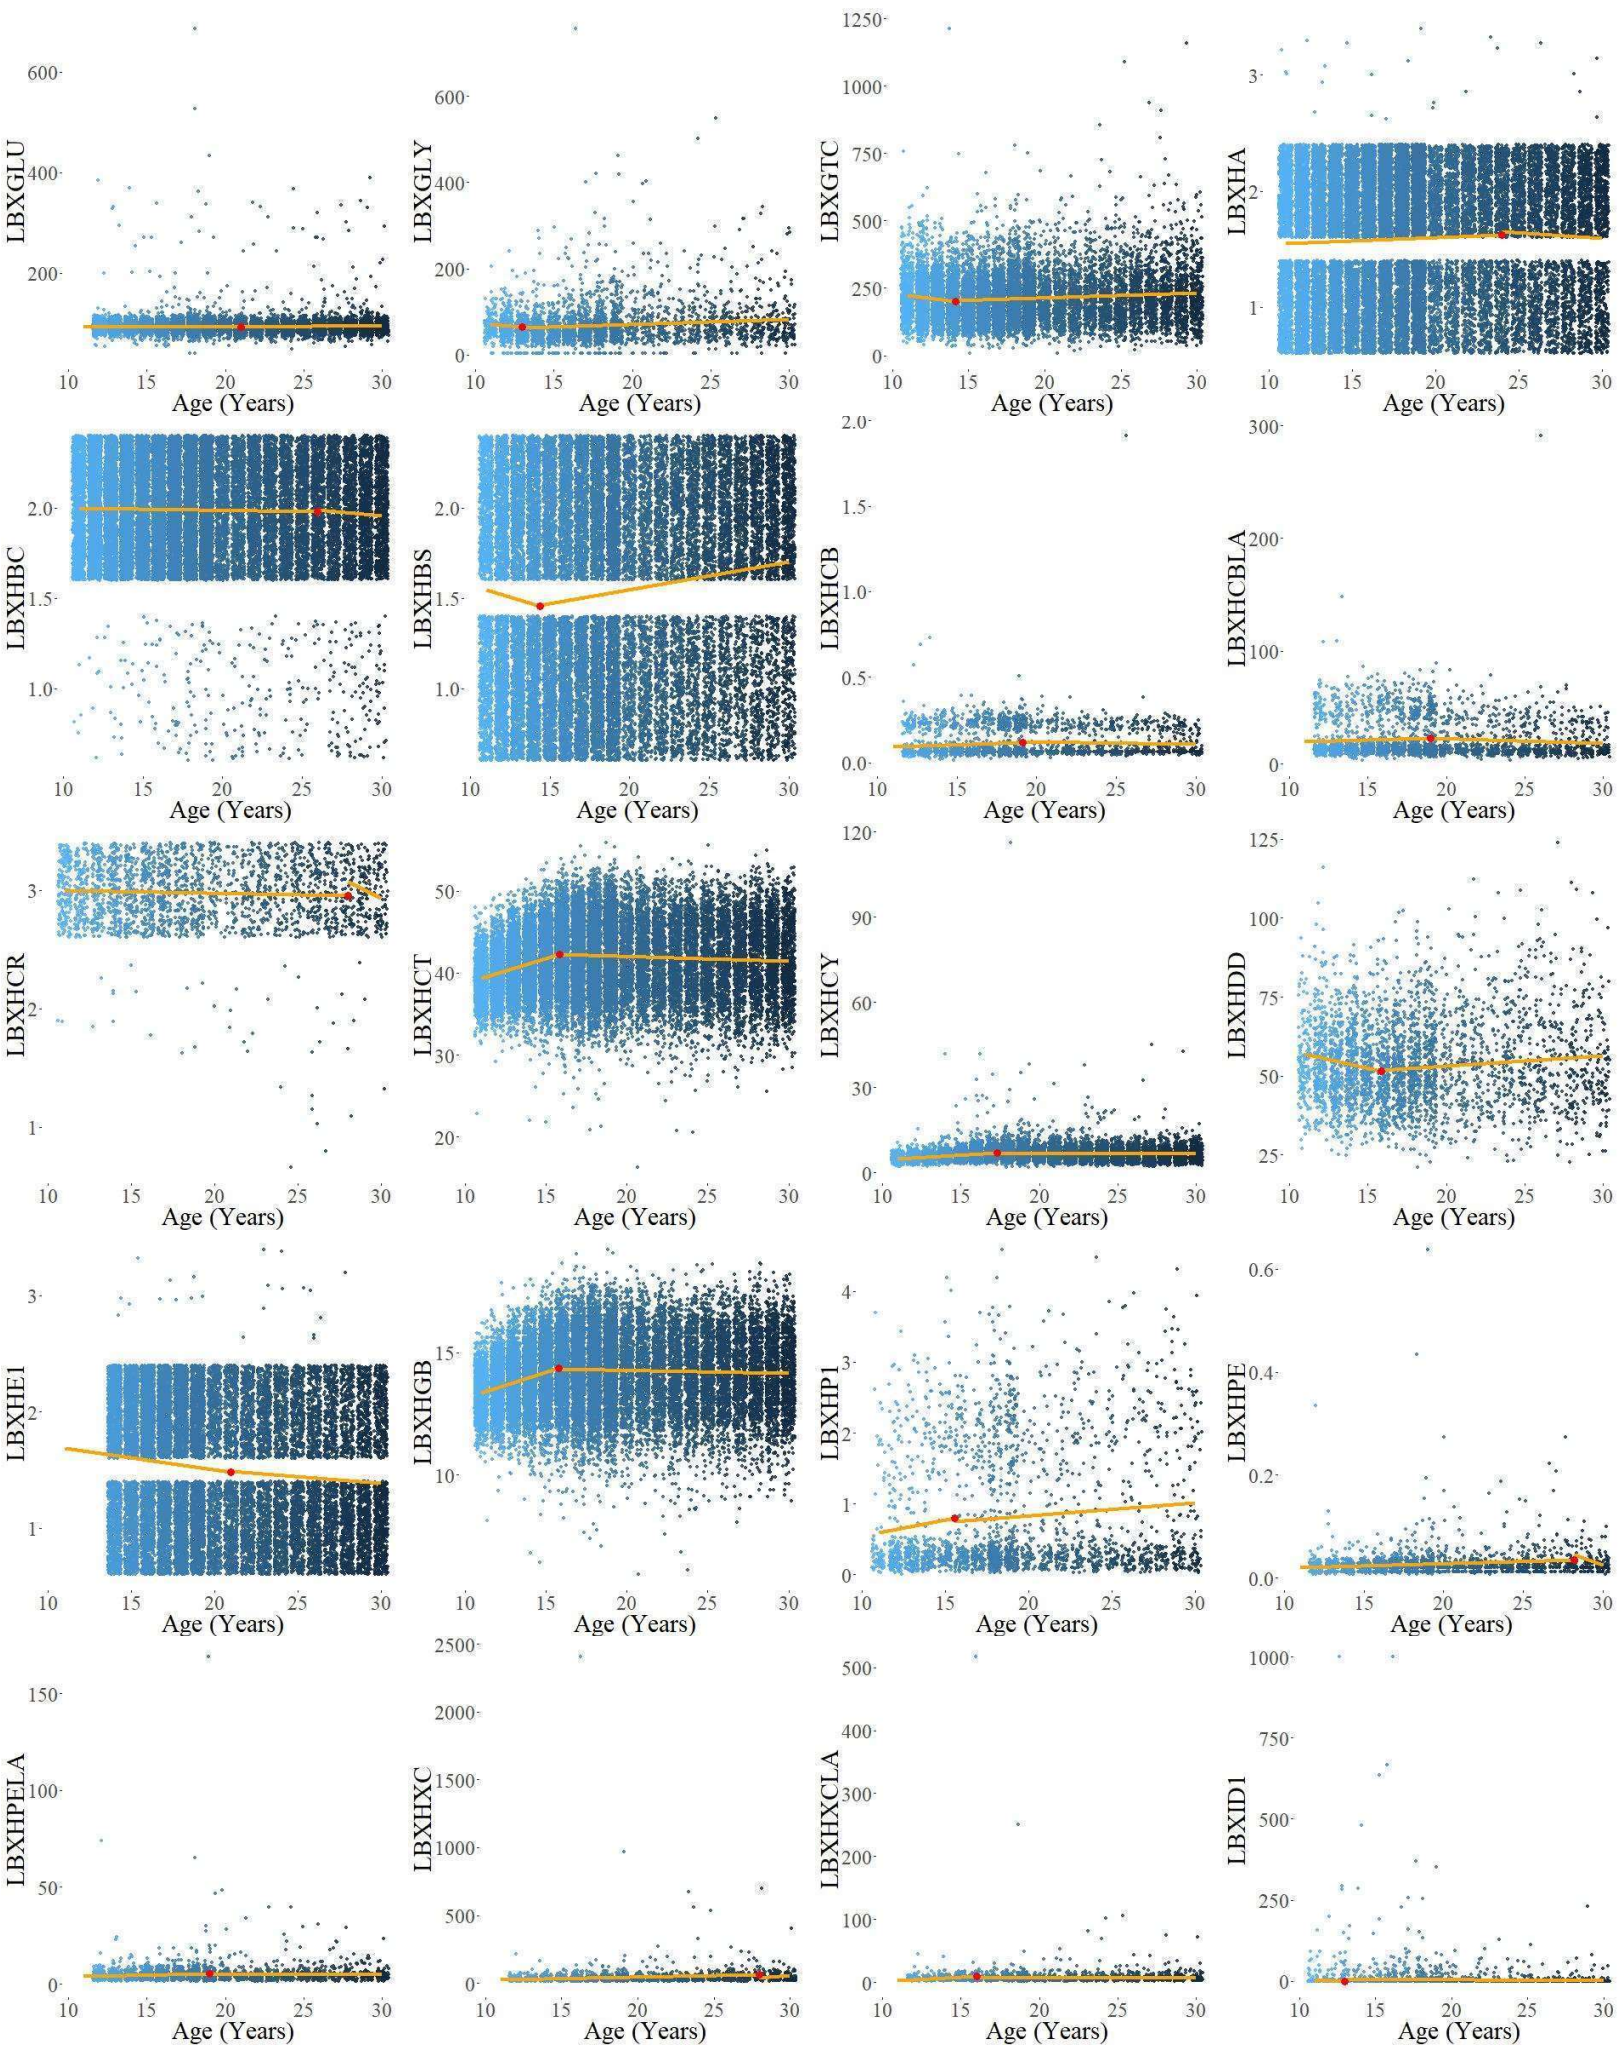





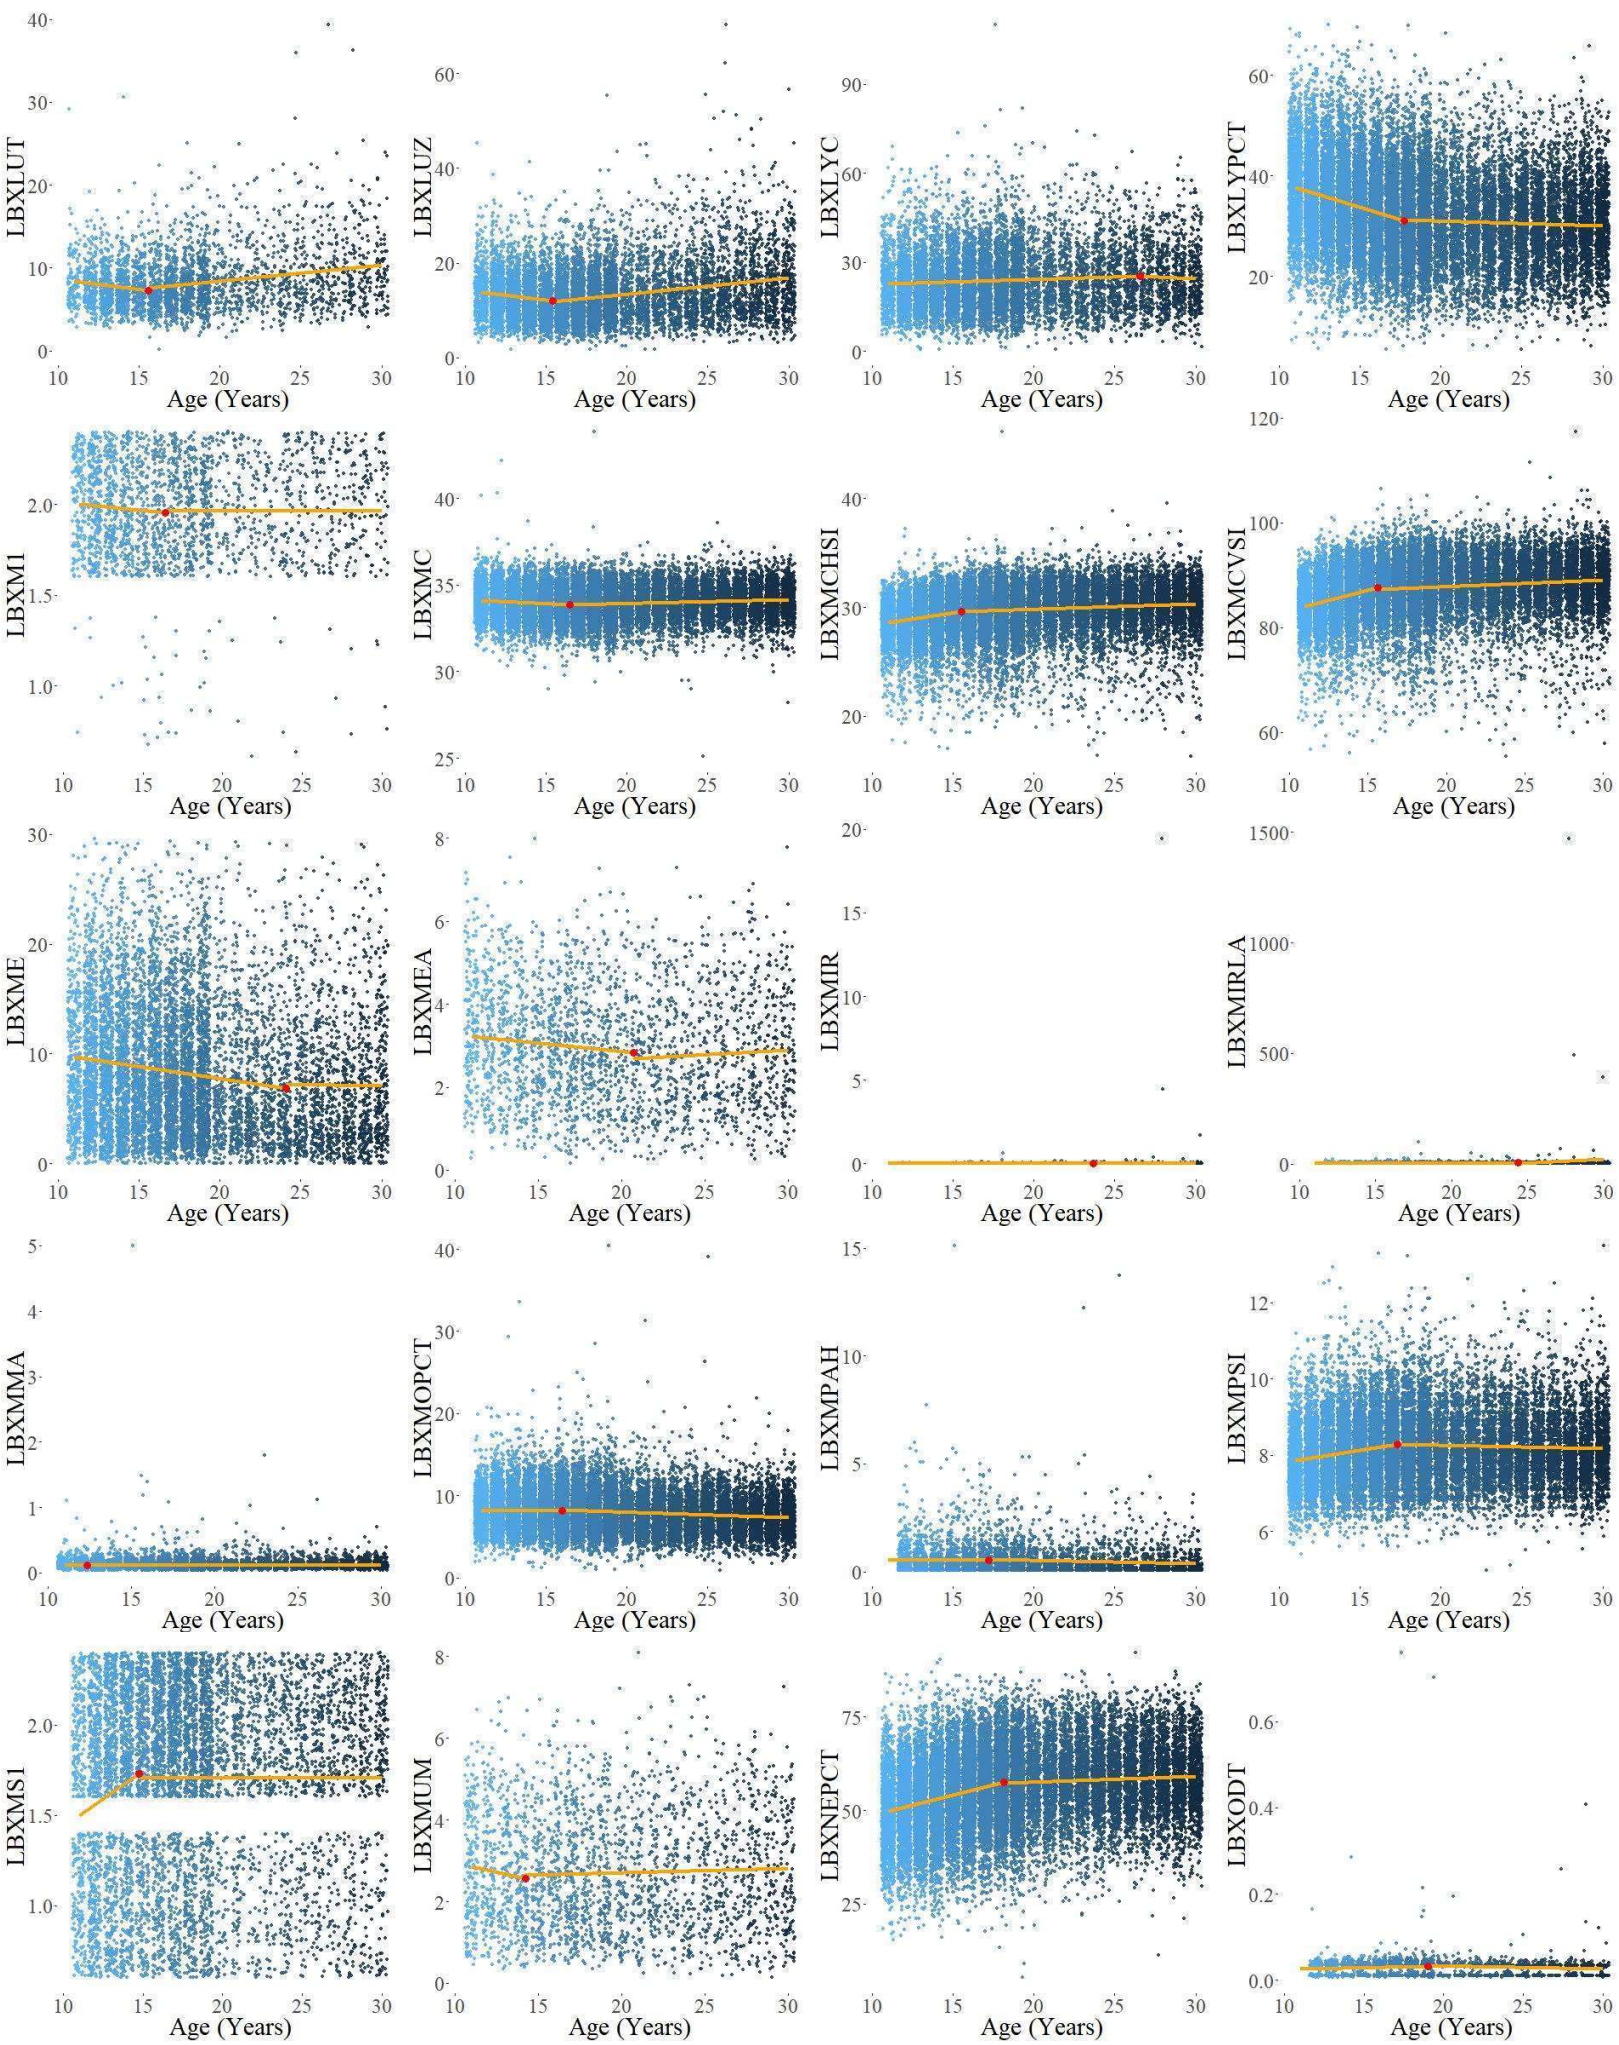



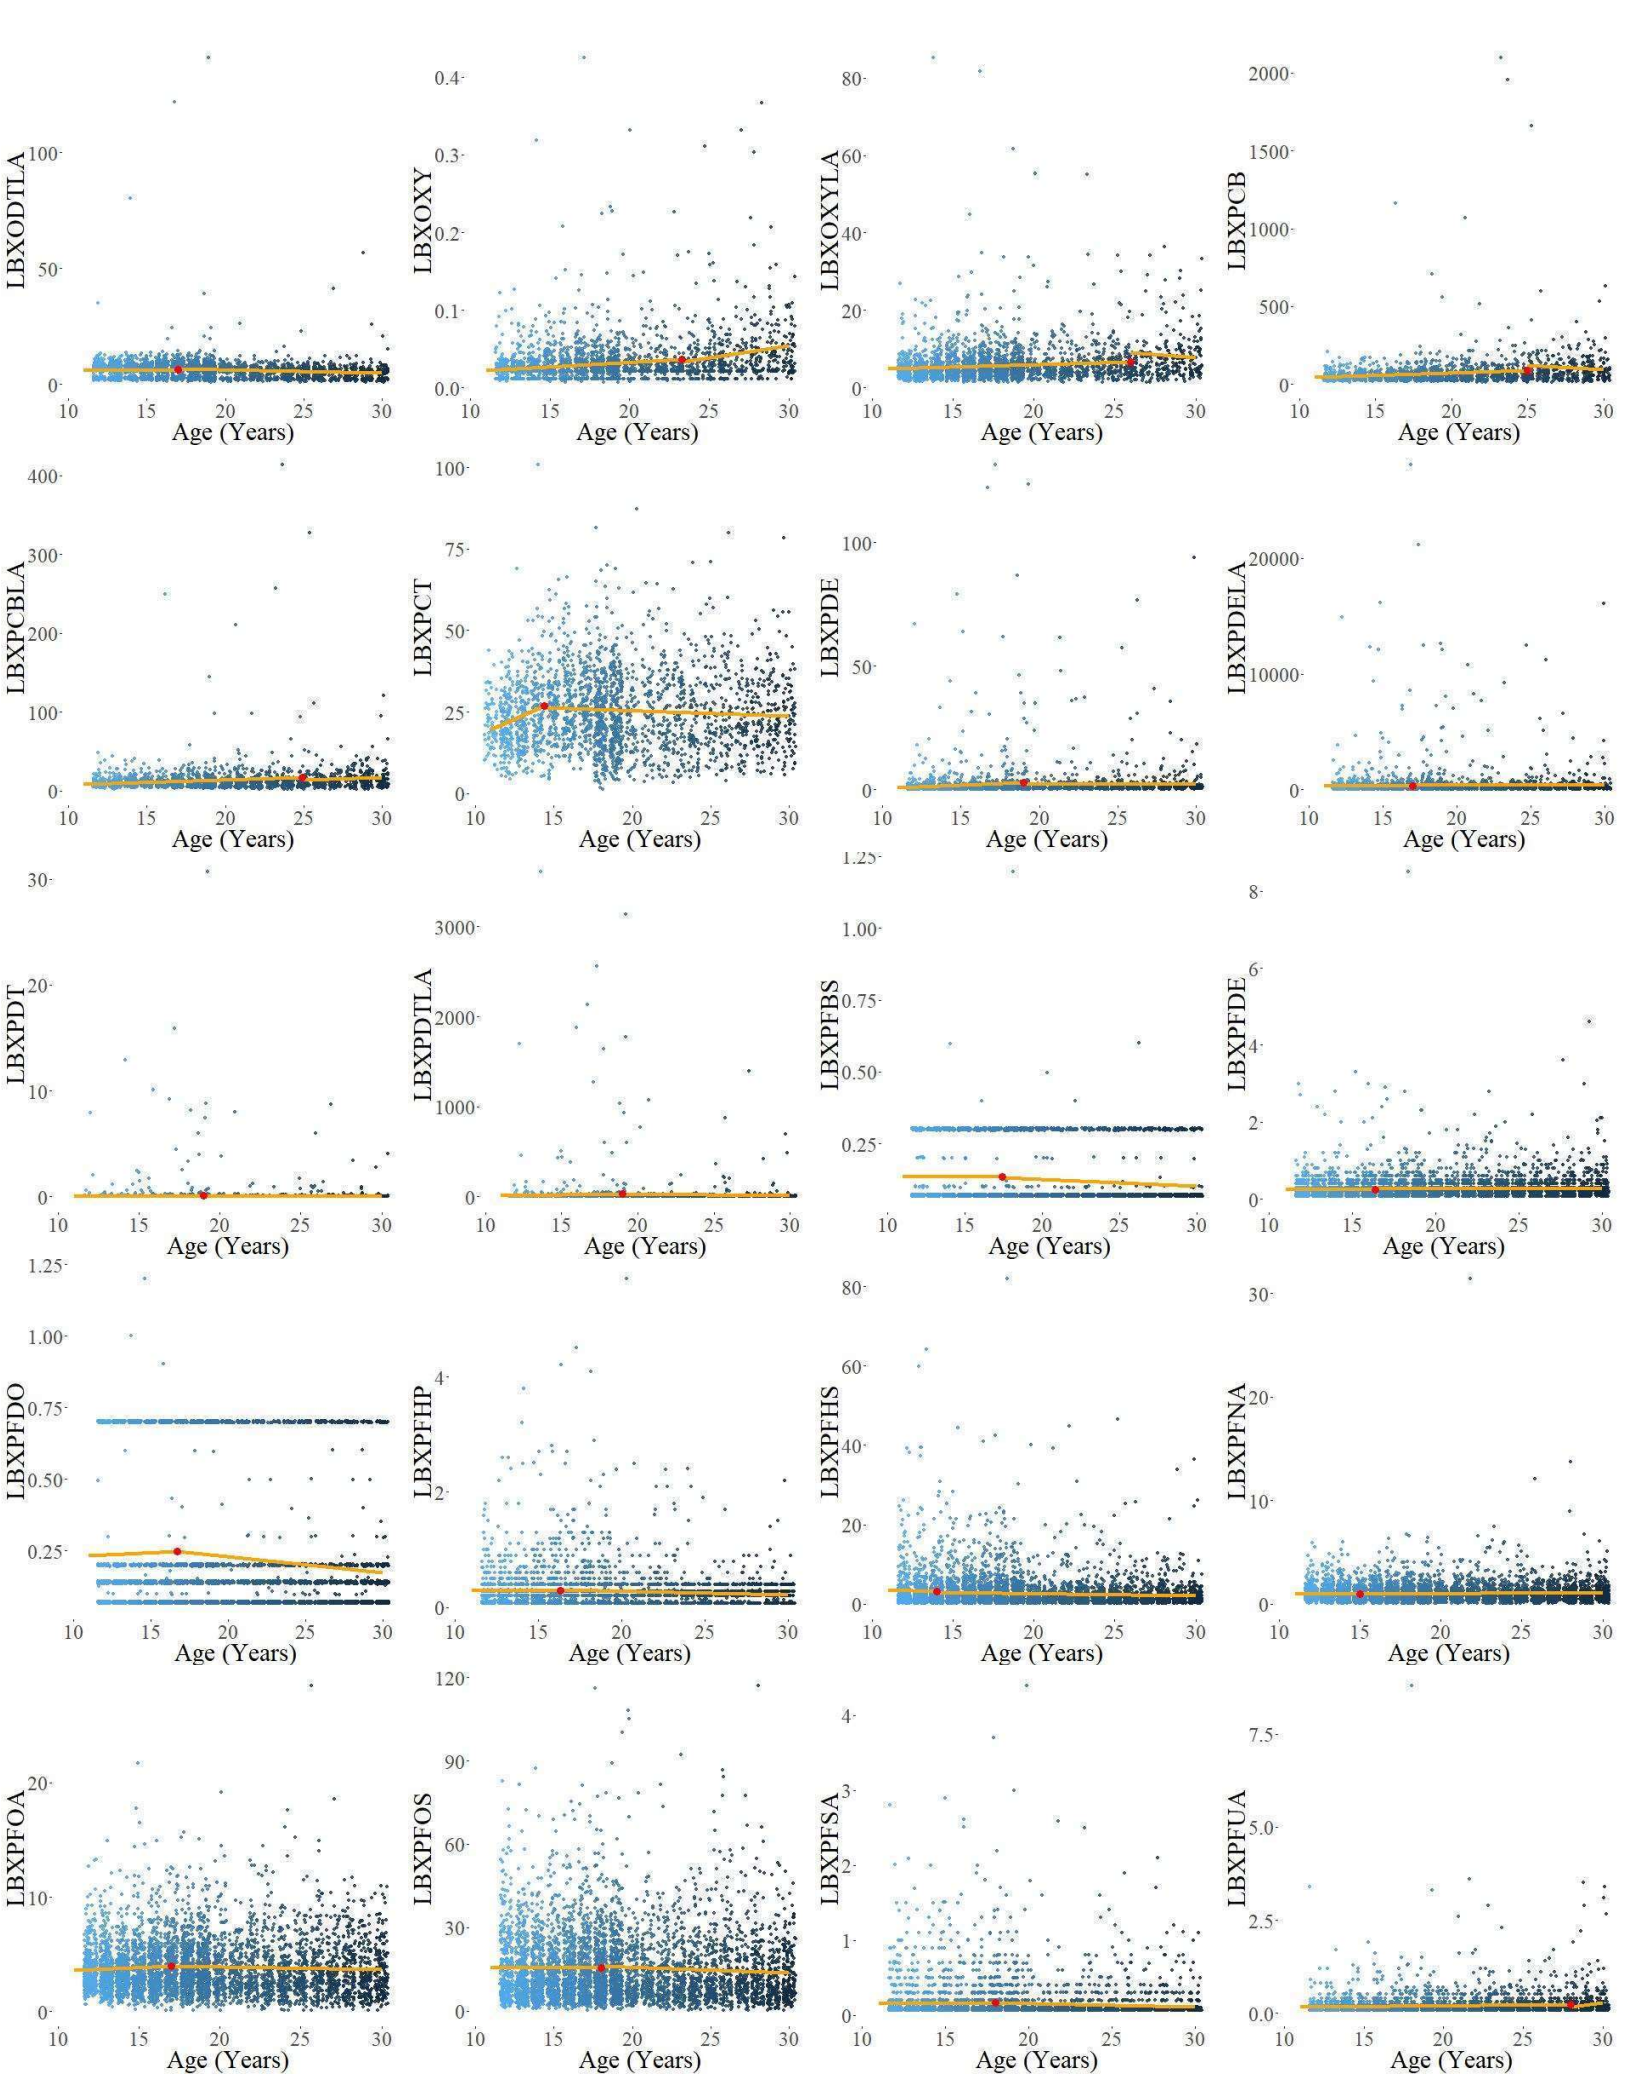



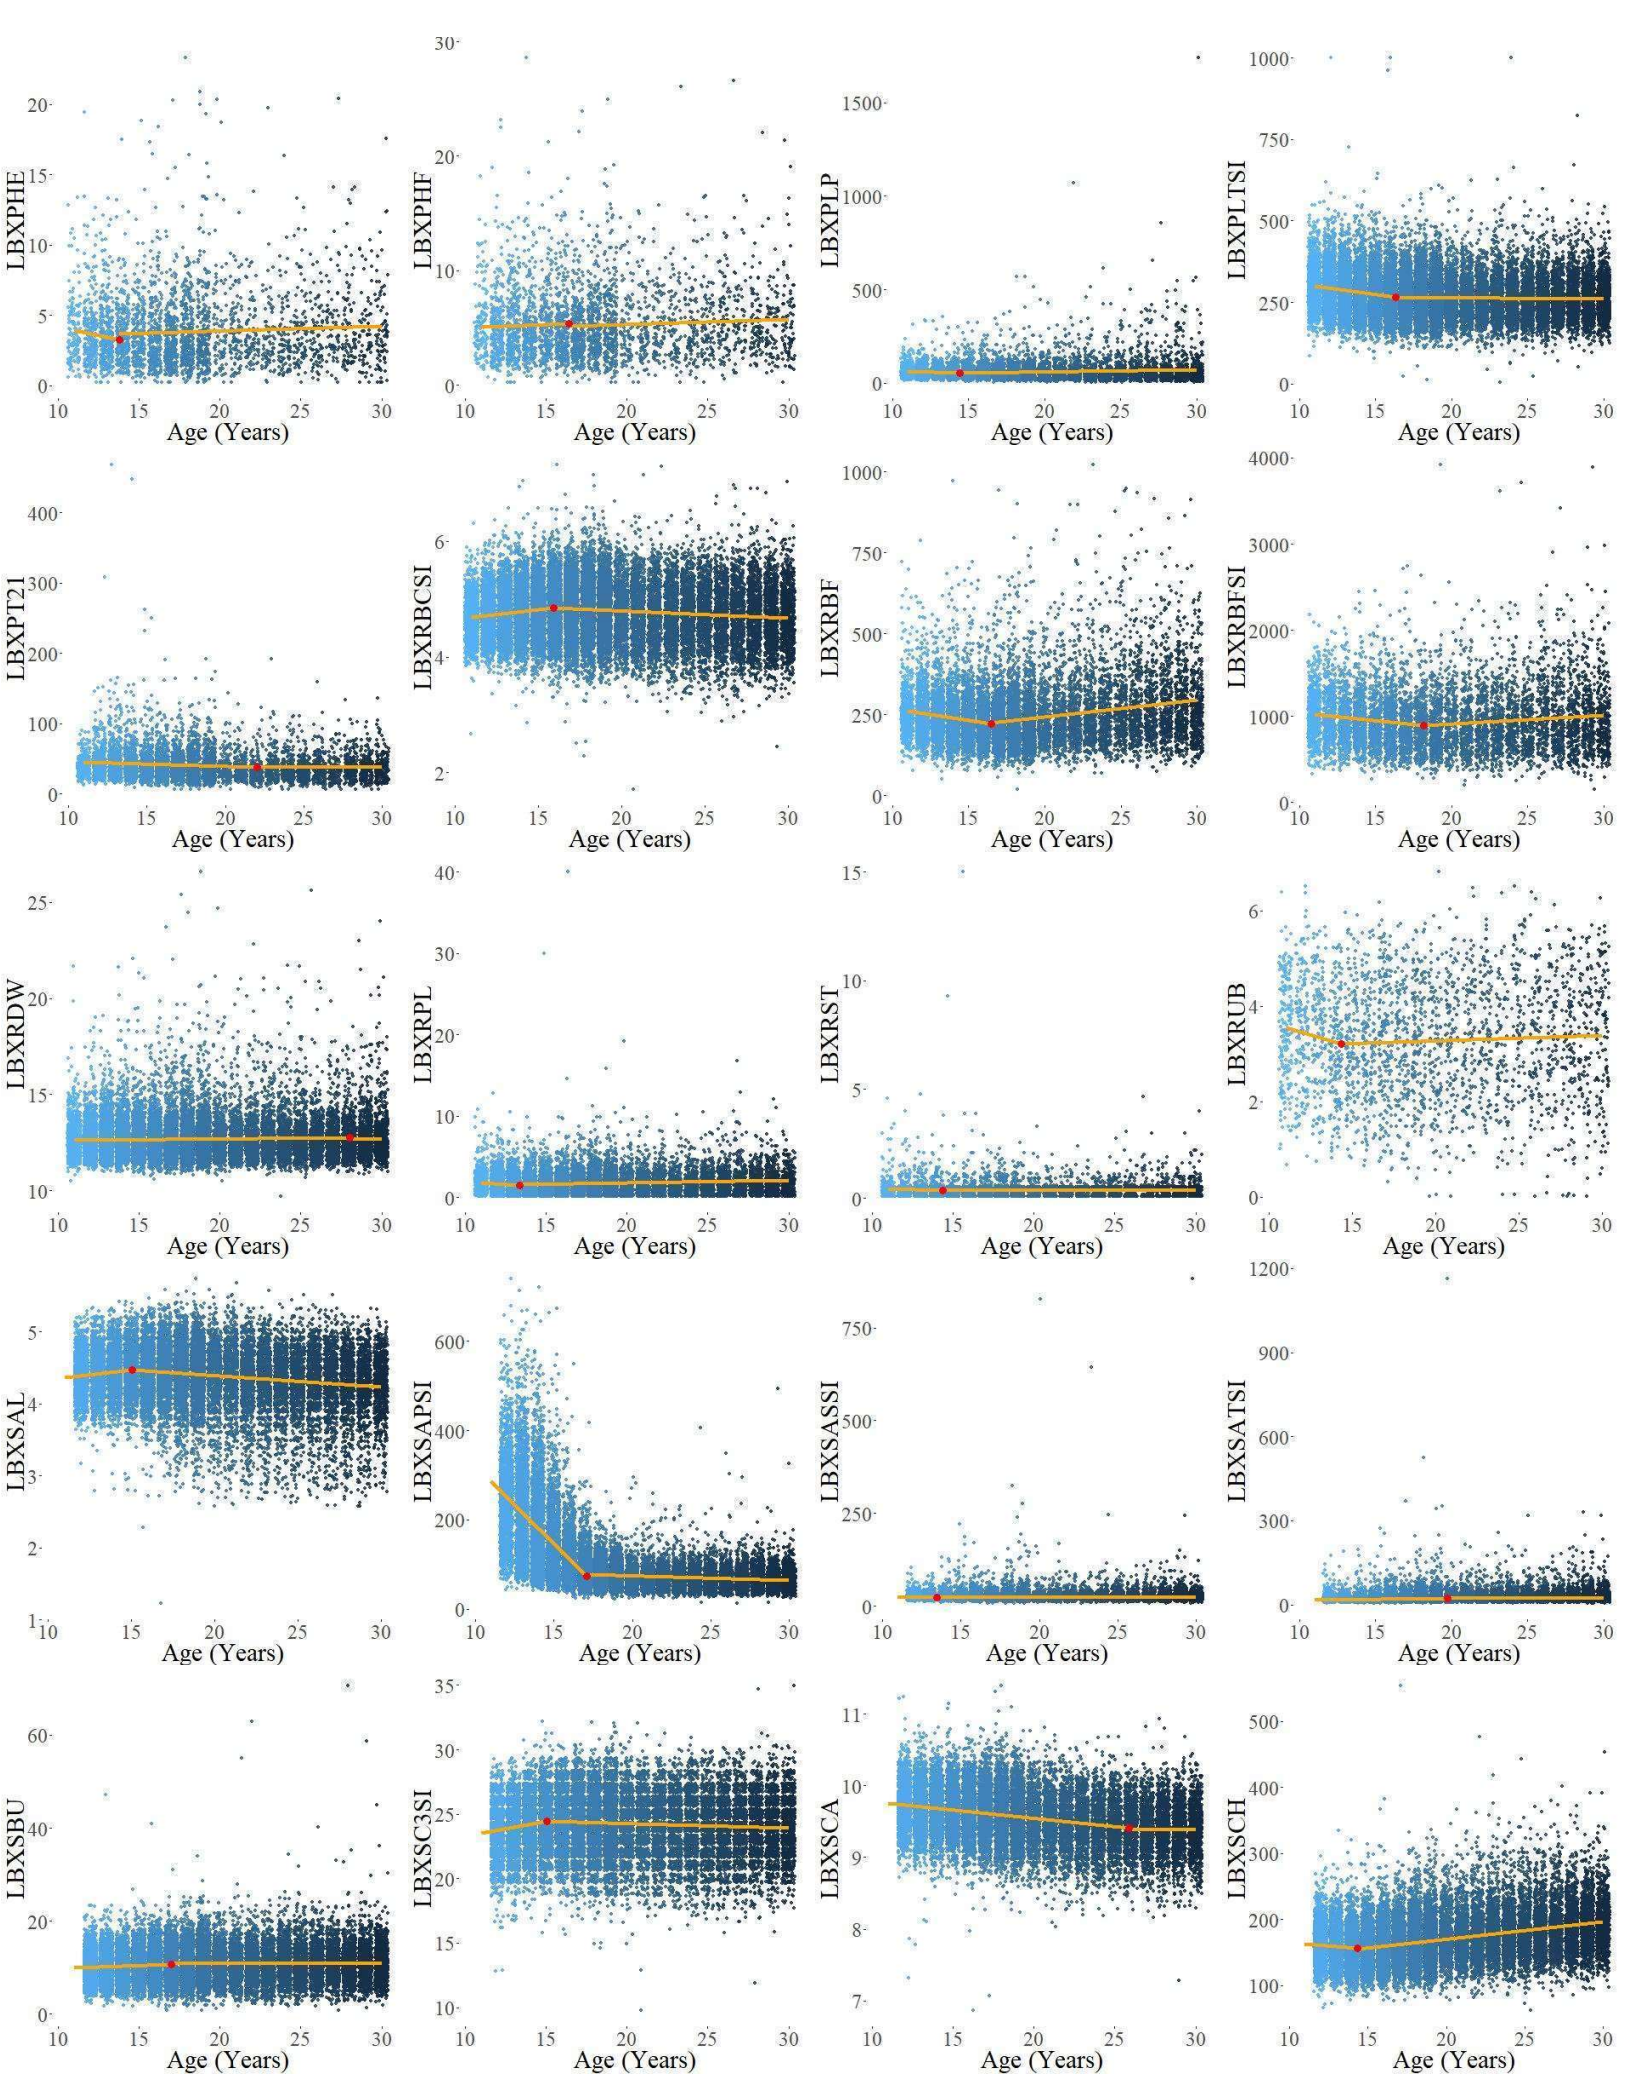



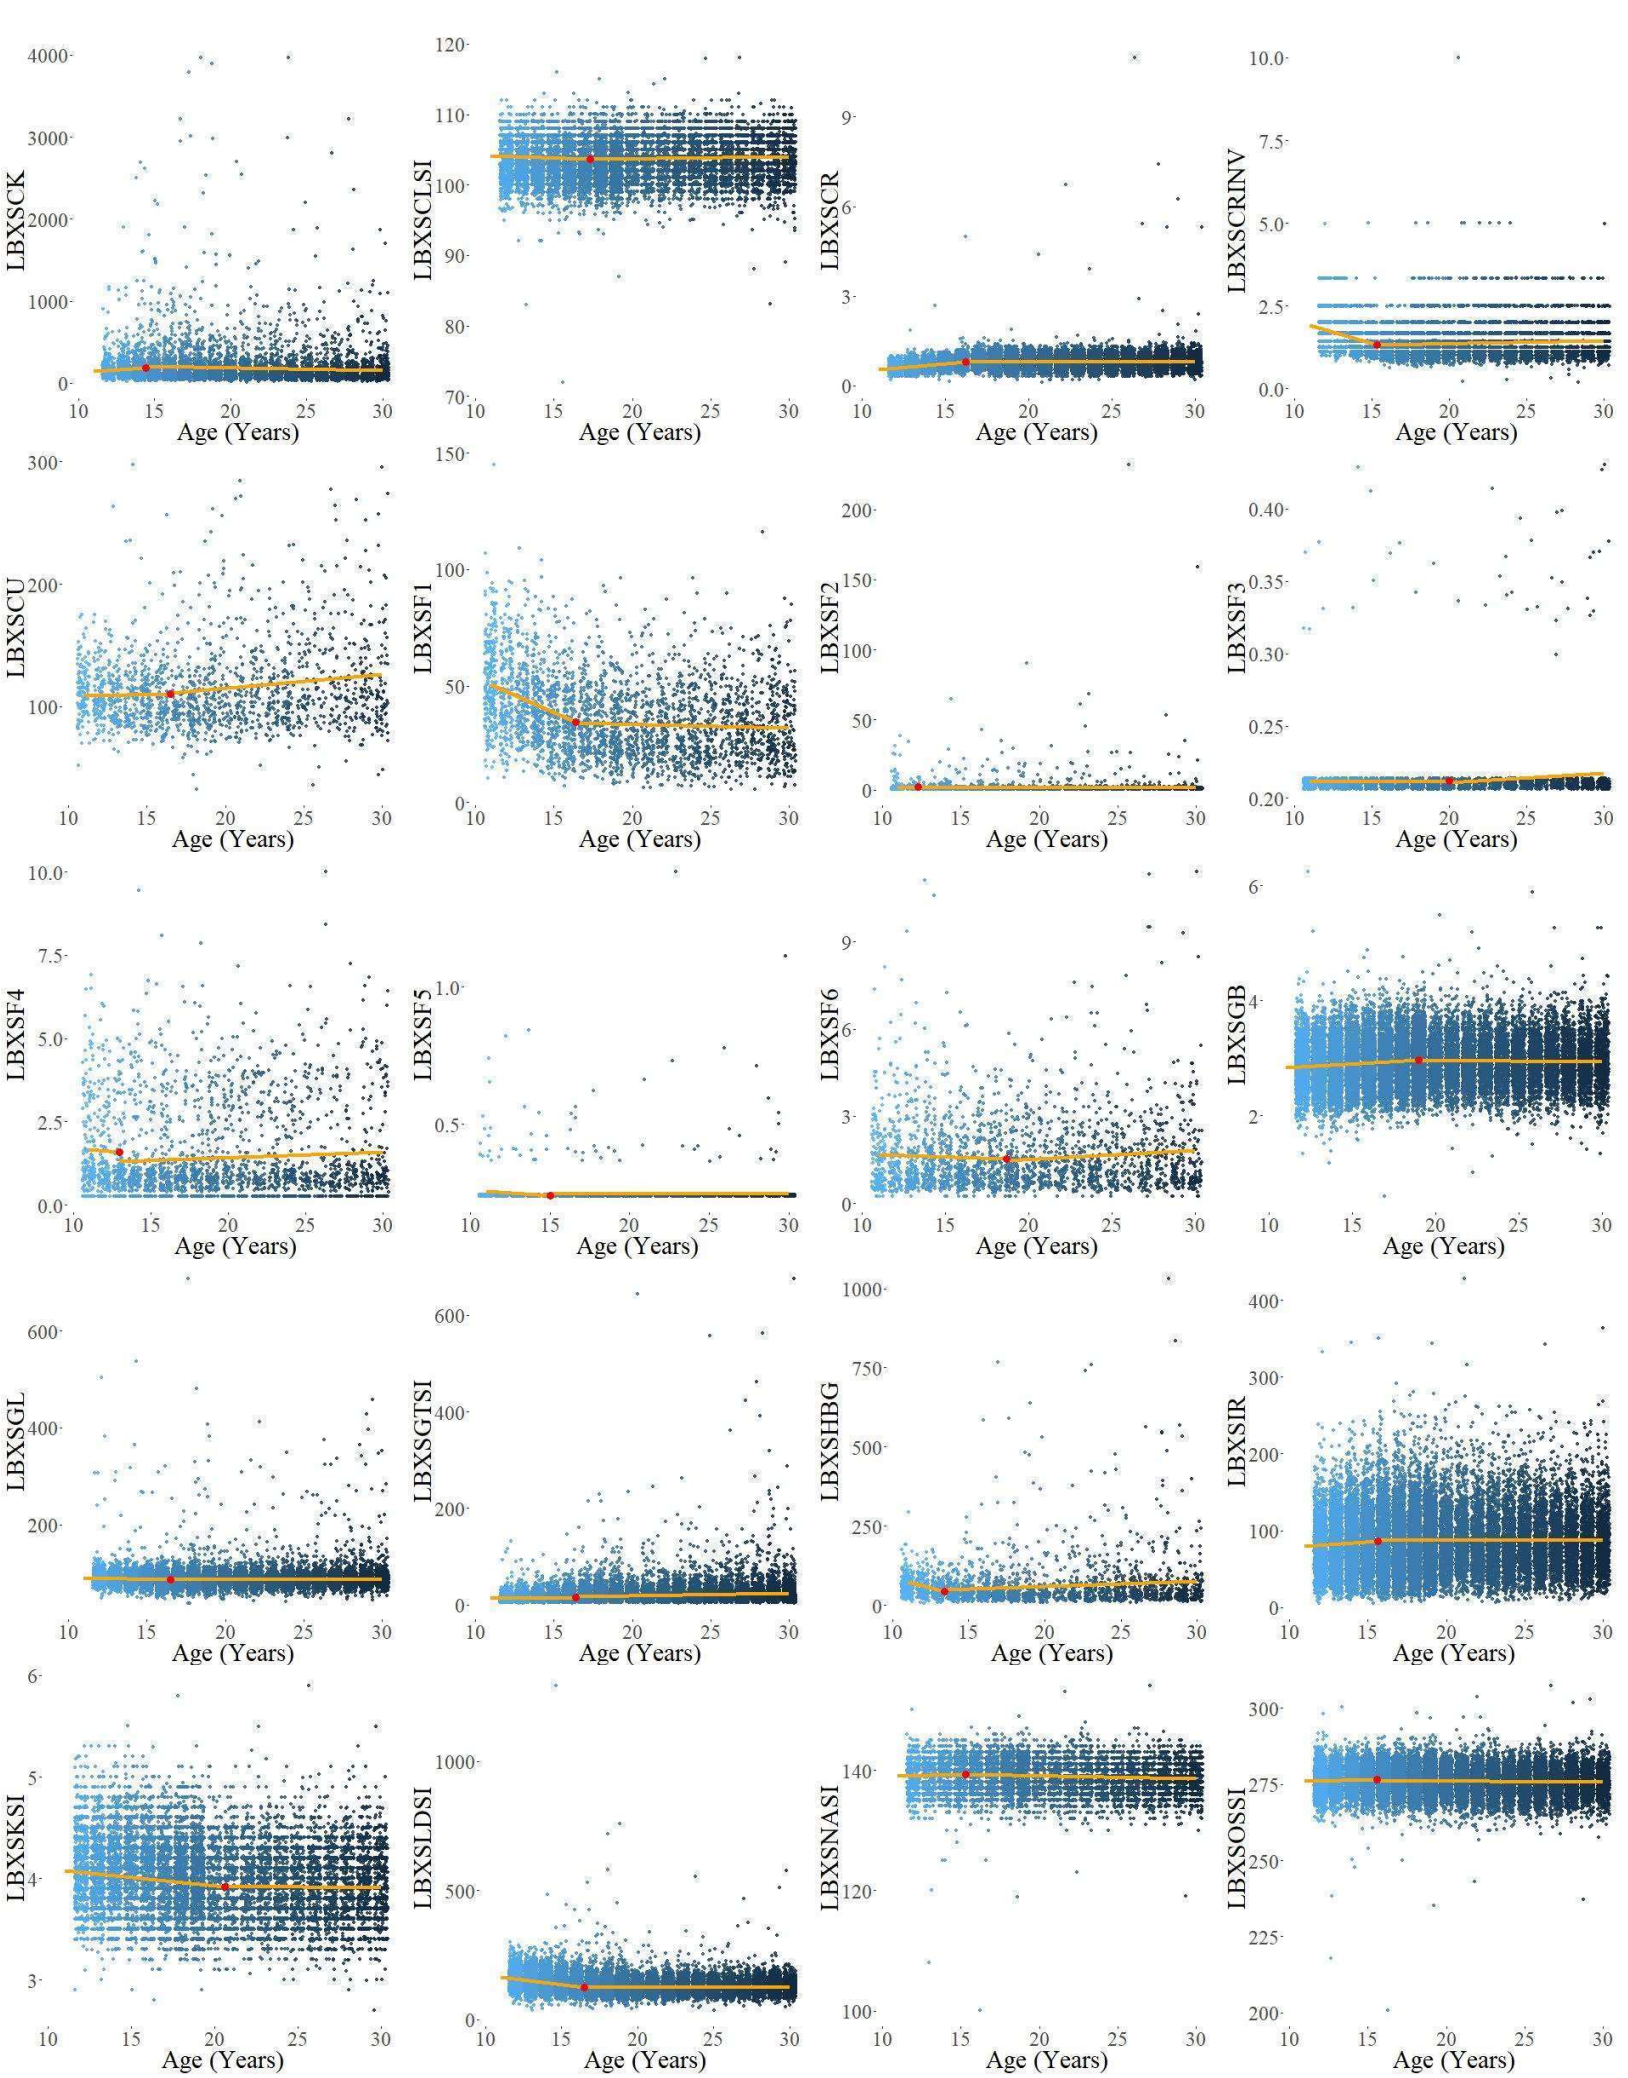



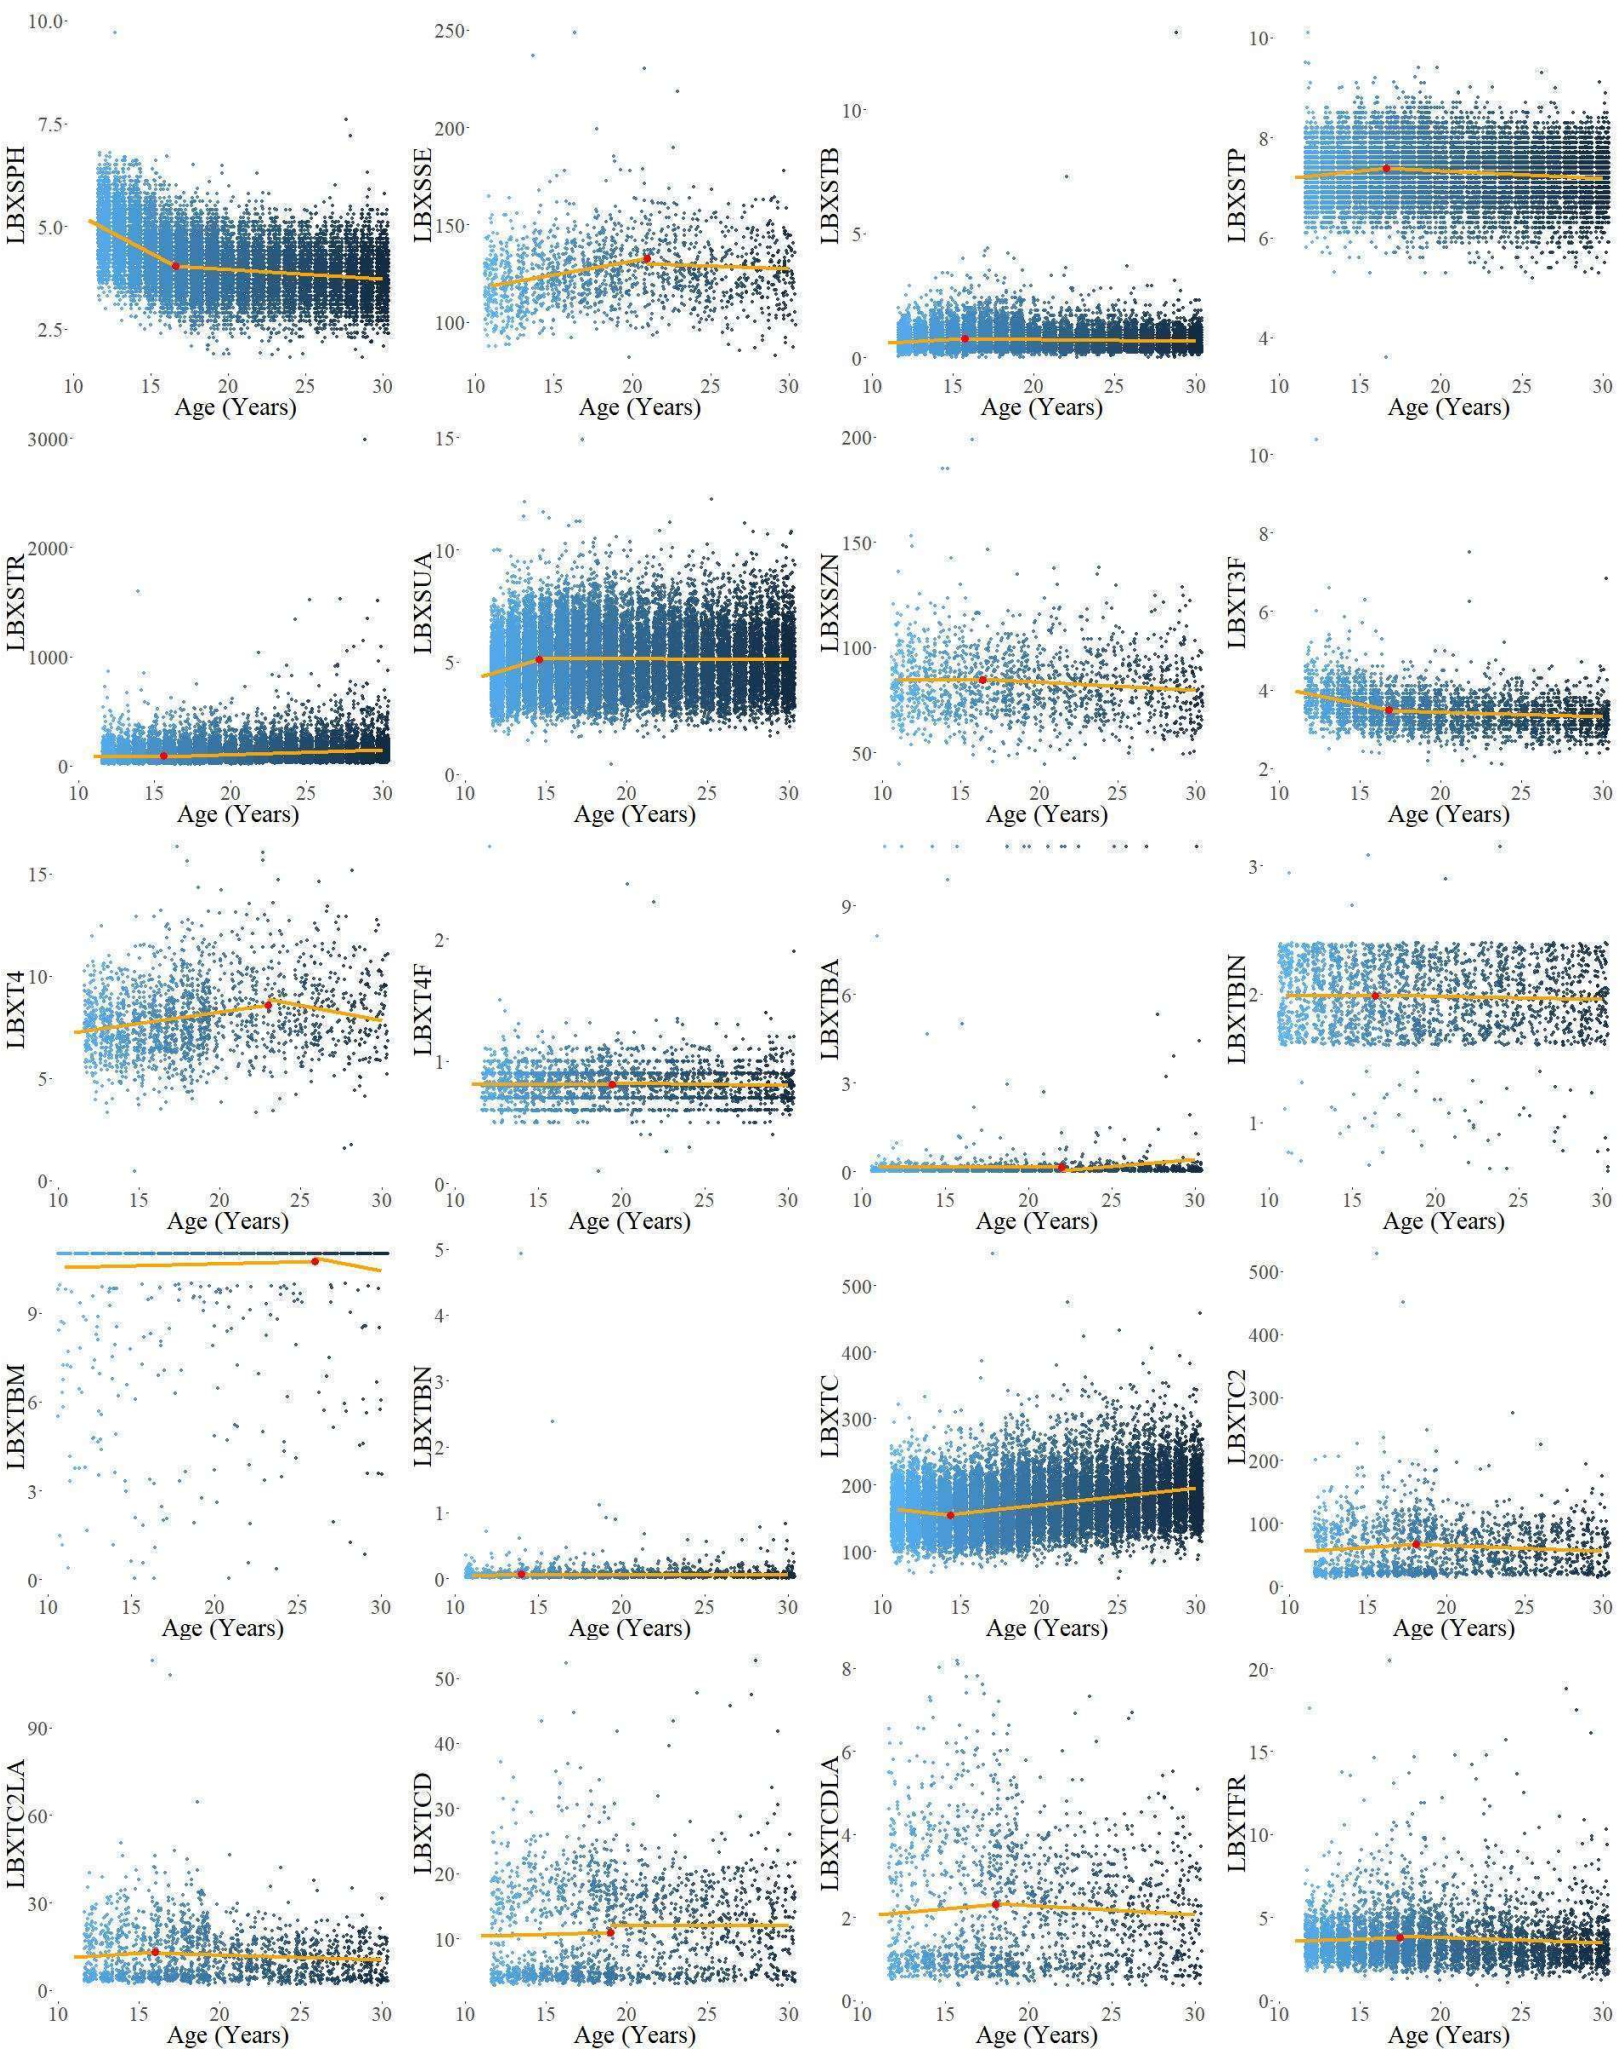



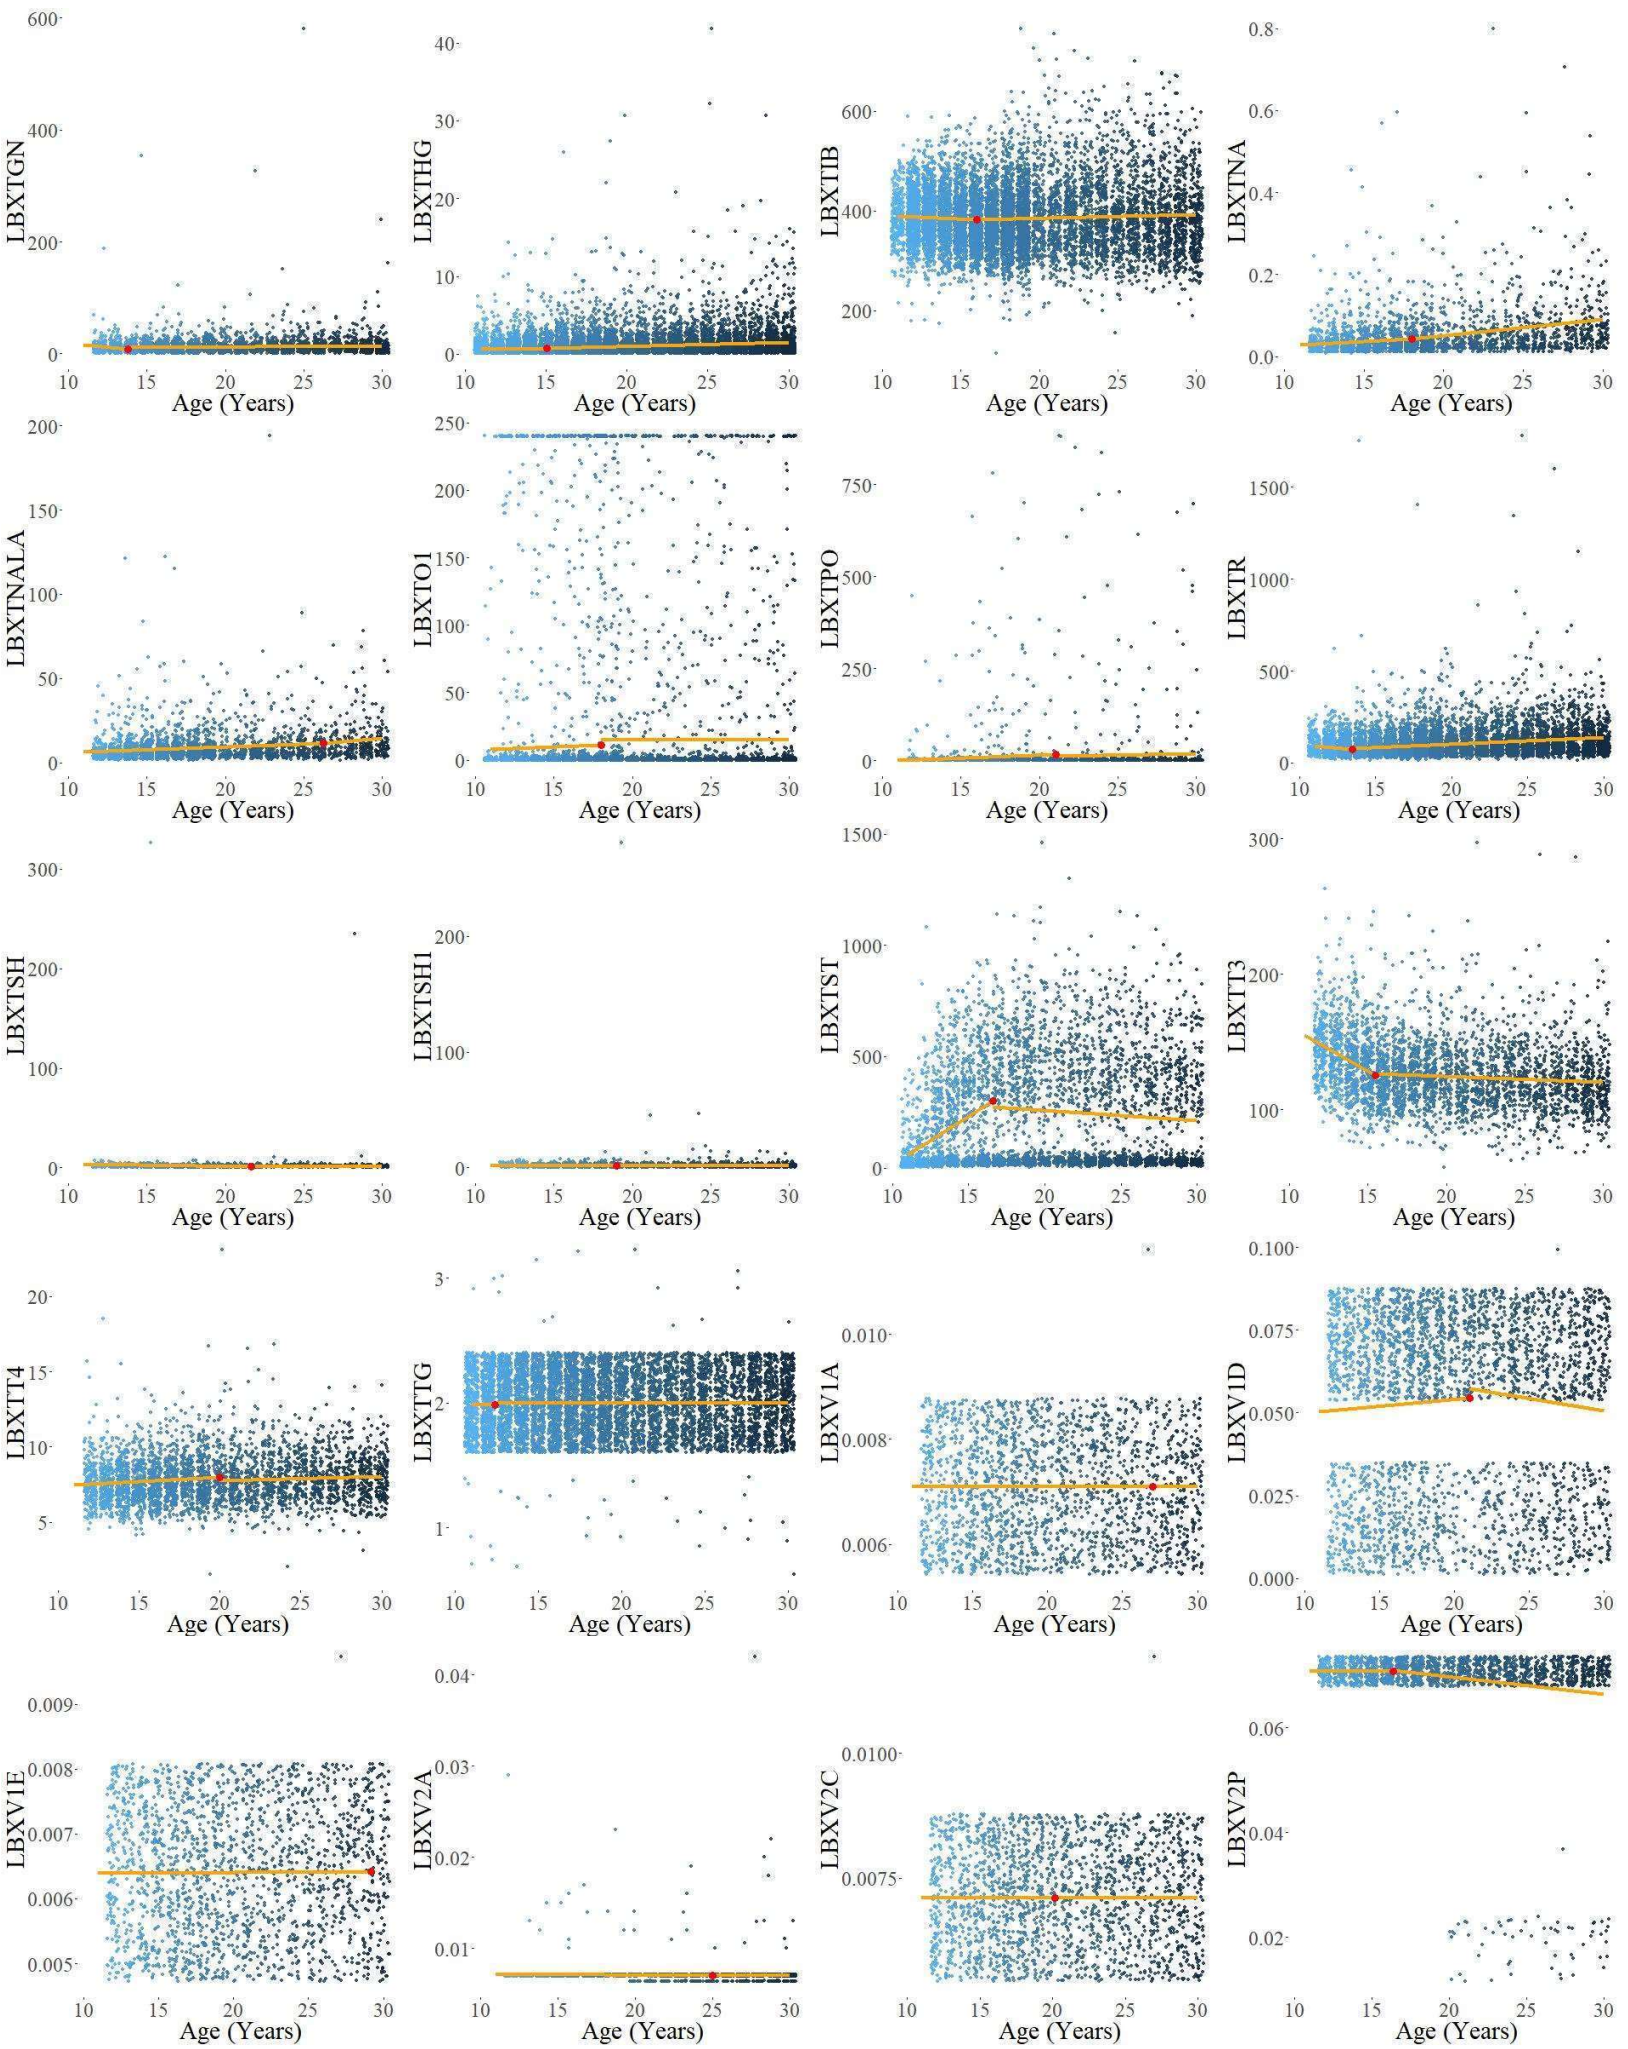



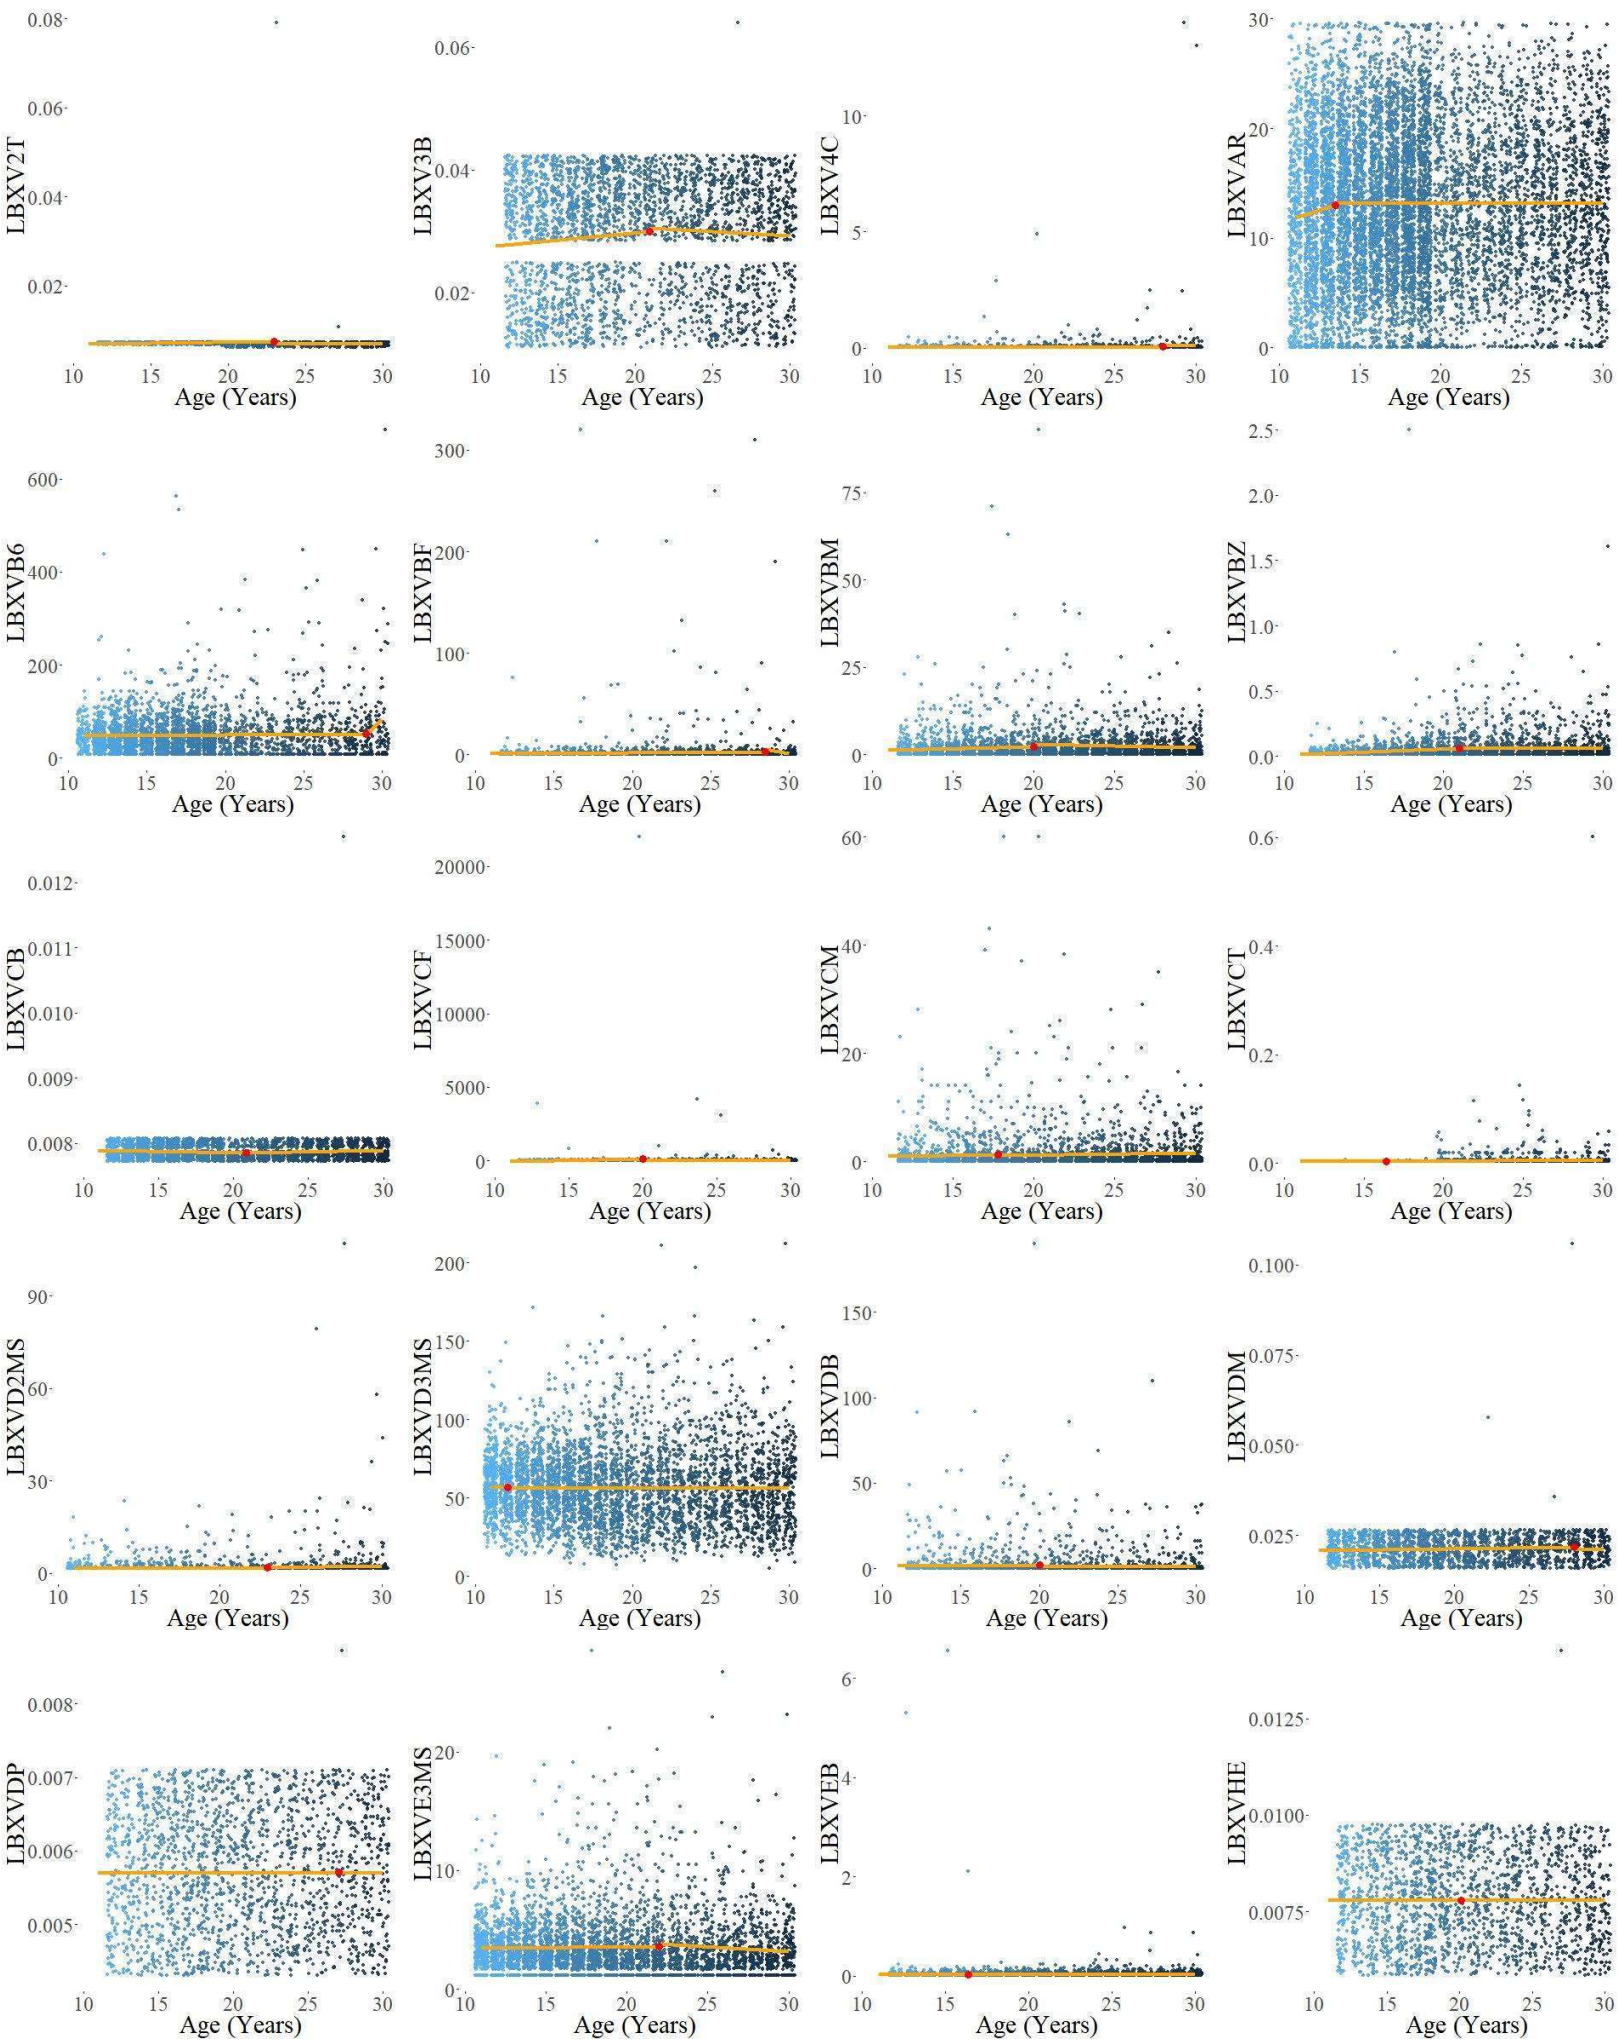

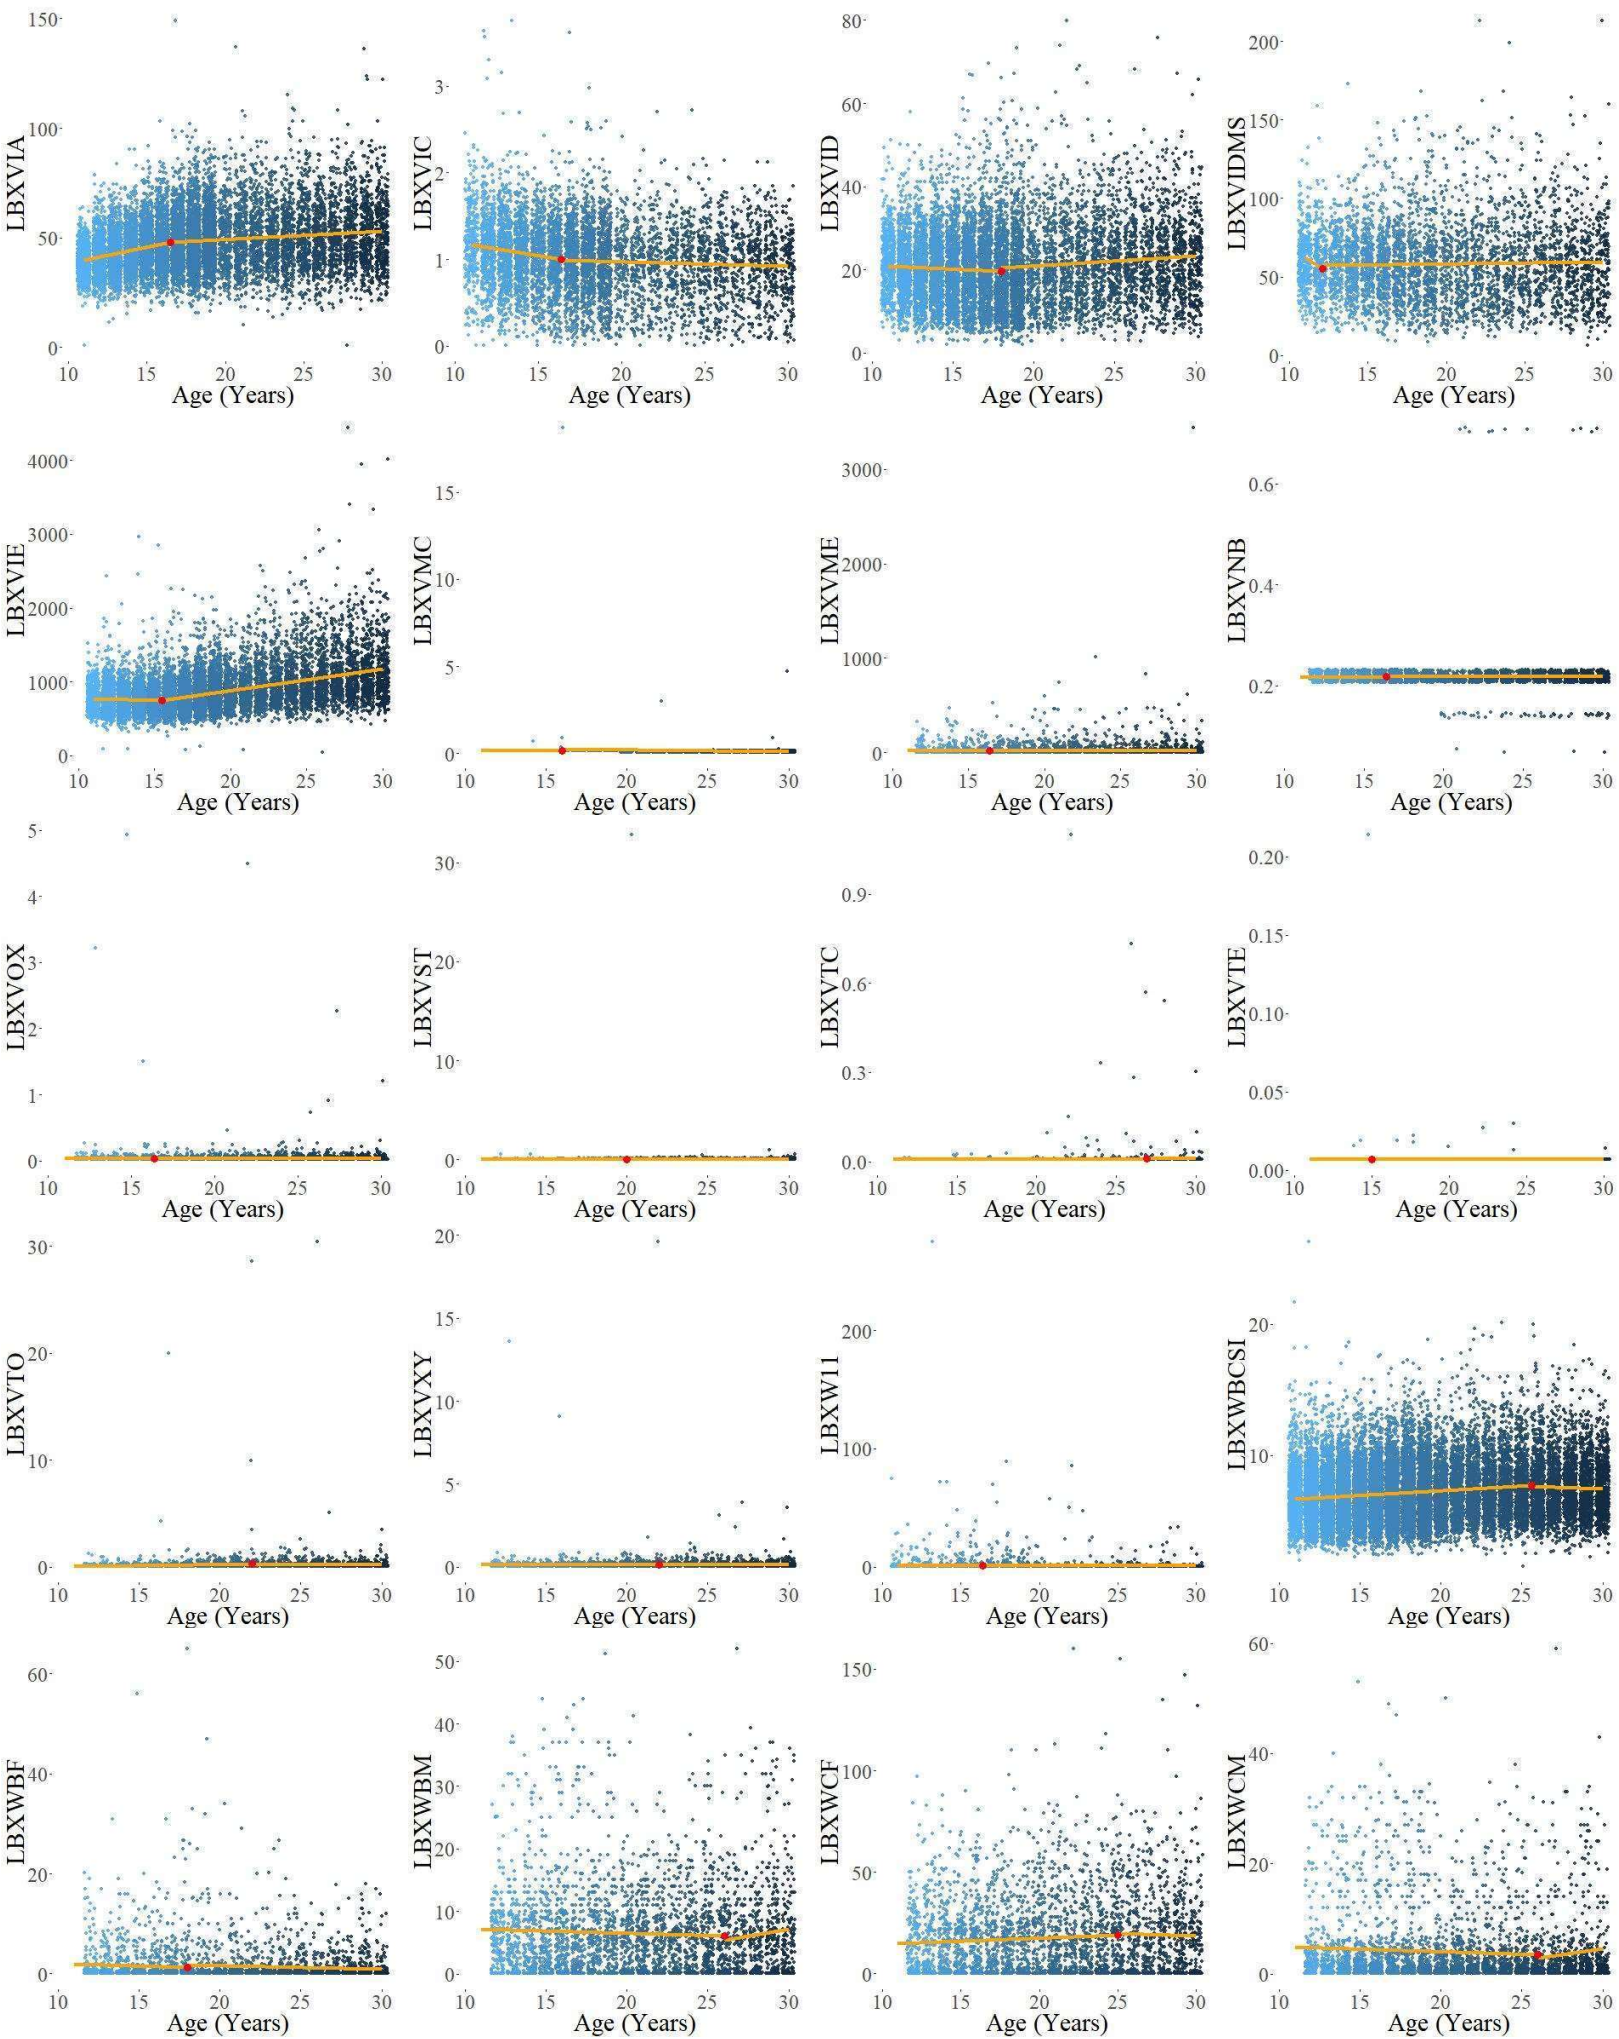



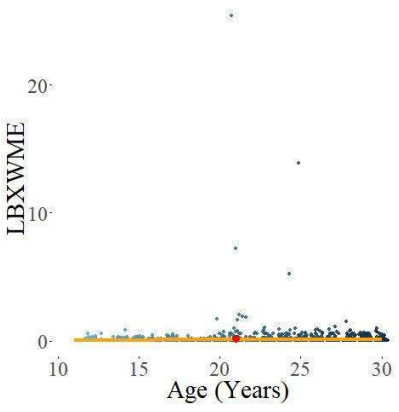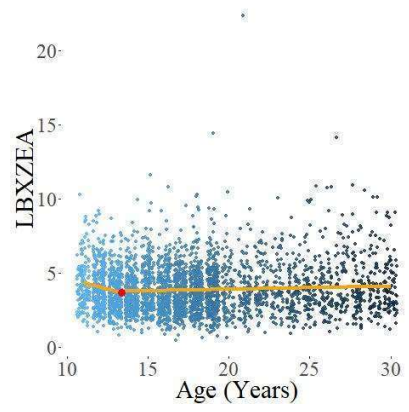

**Supplementary Figure 2.** Analyte levels by age, colored by gender for 301 analytes.



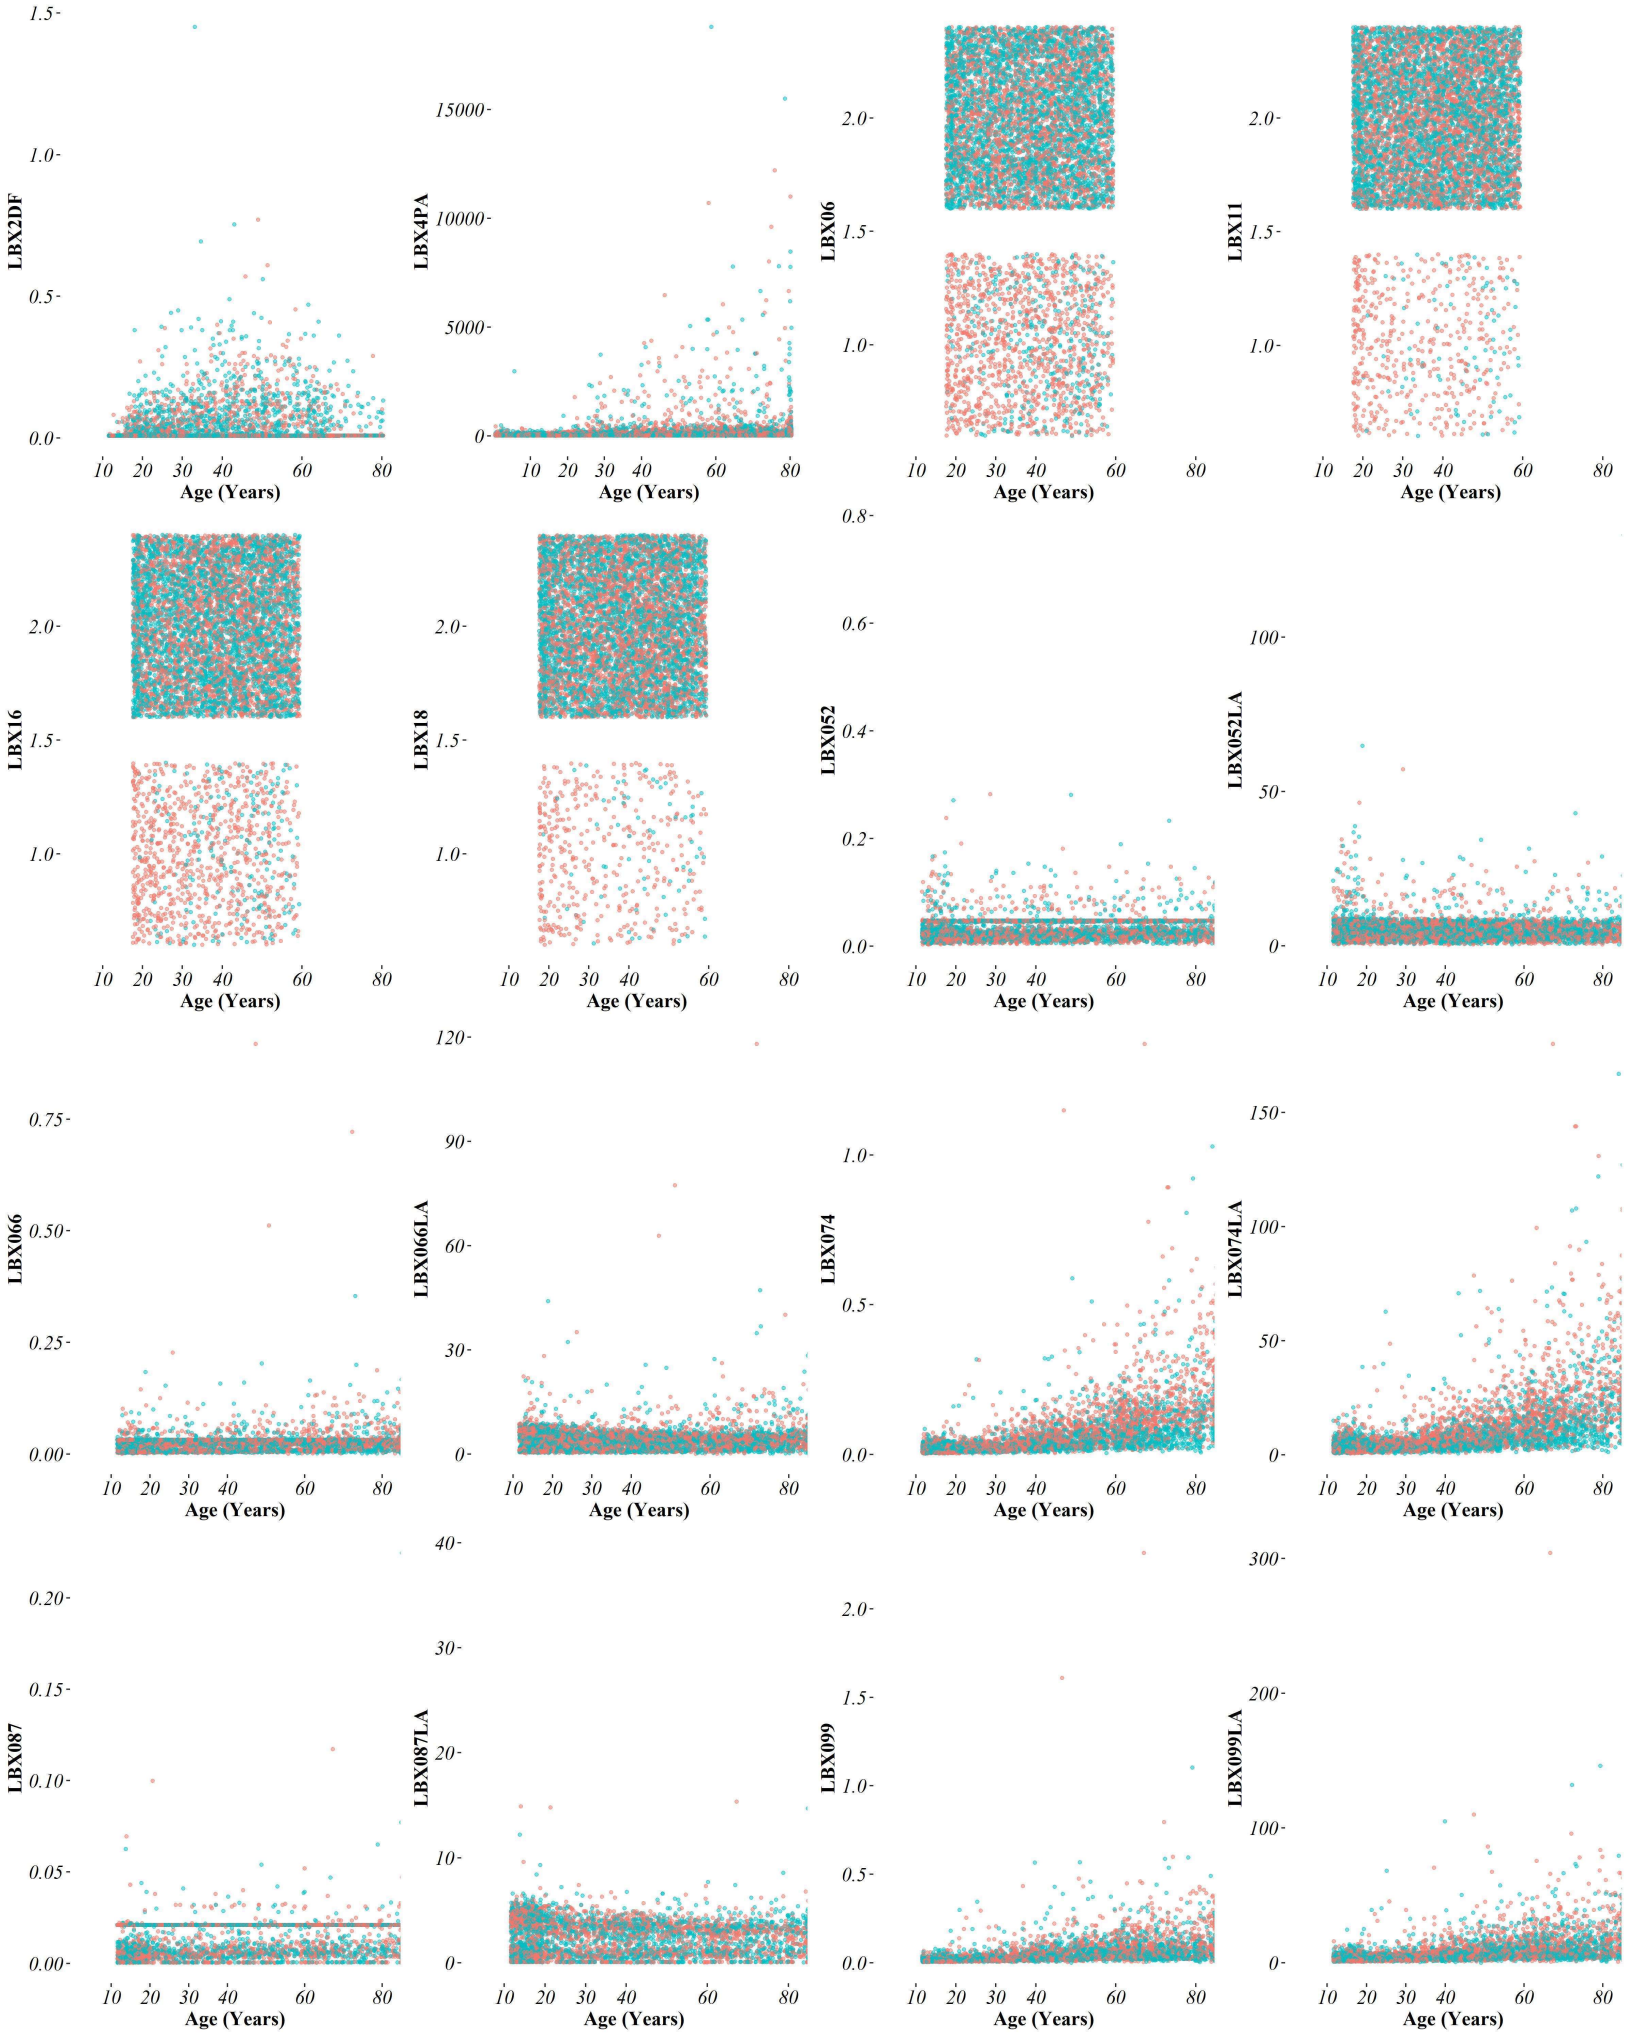

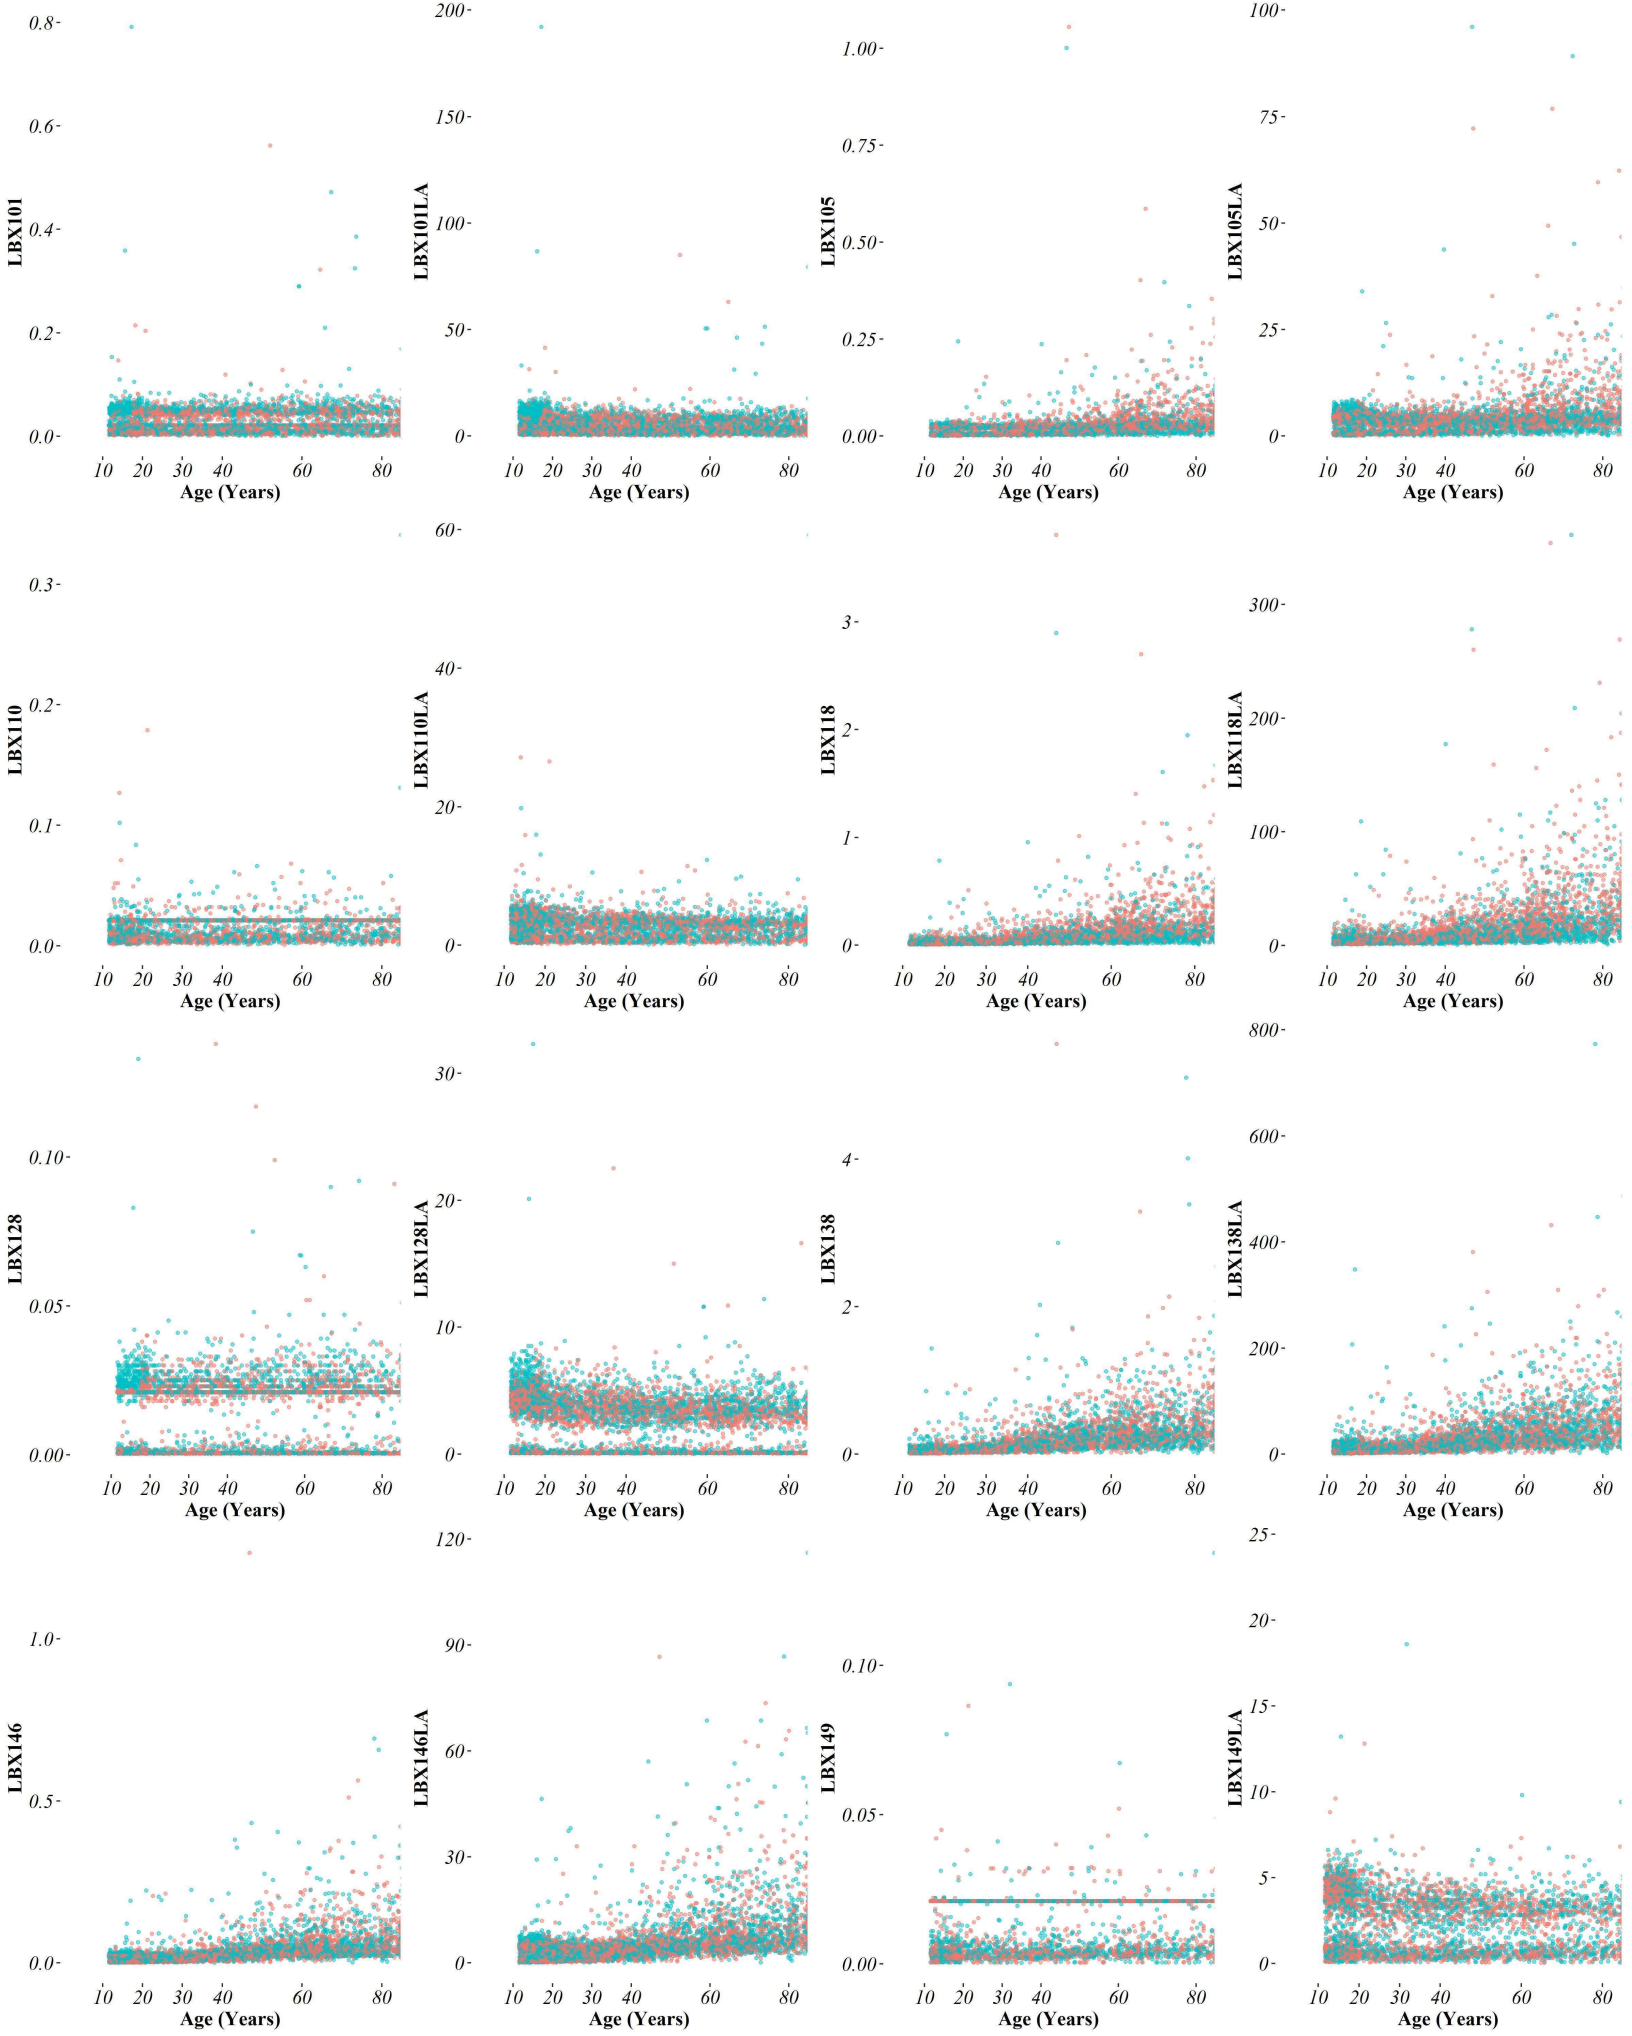



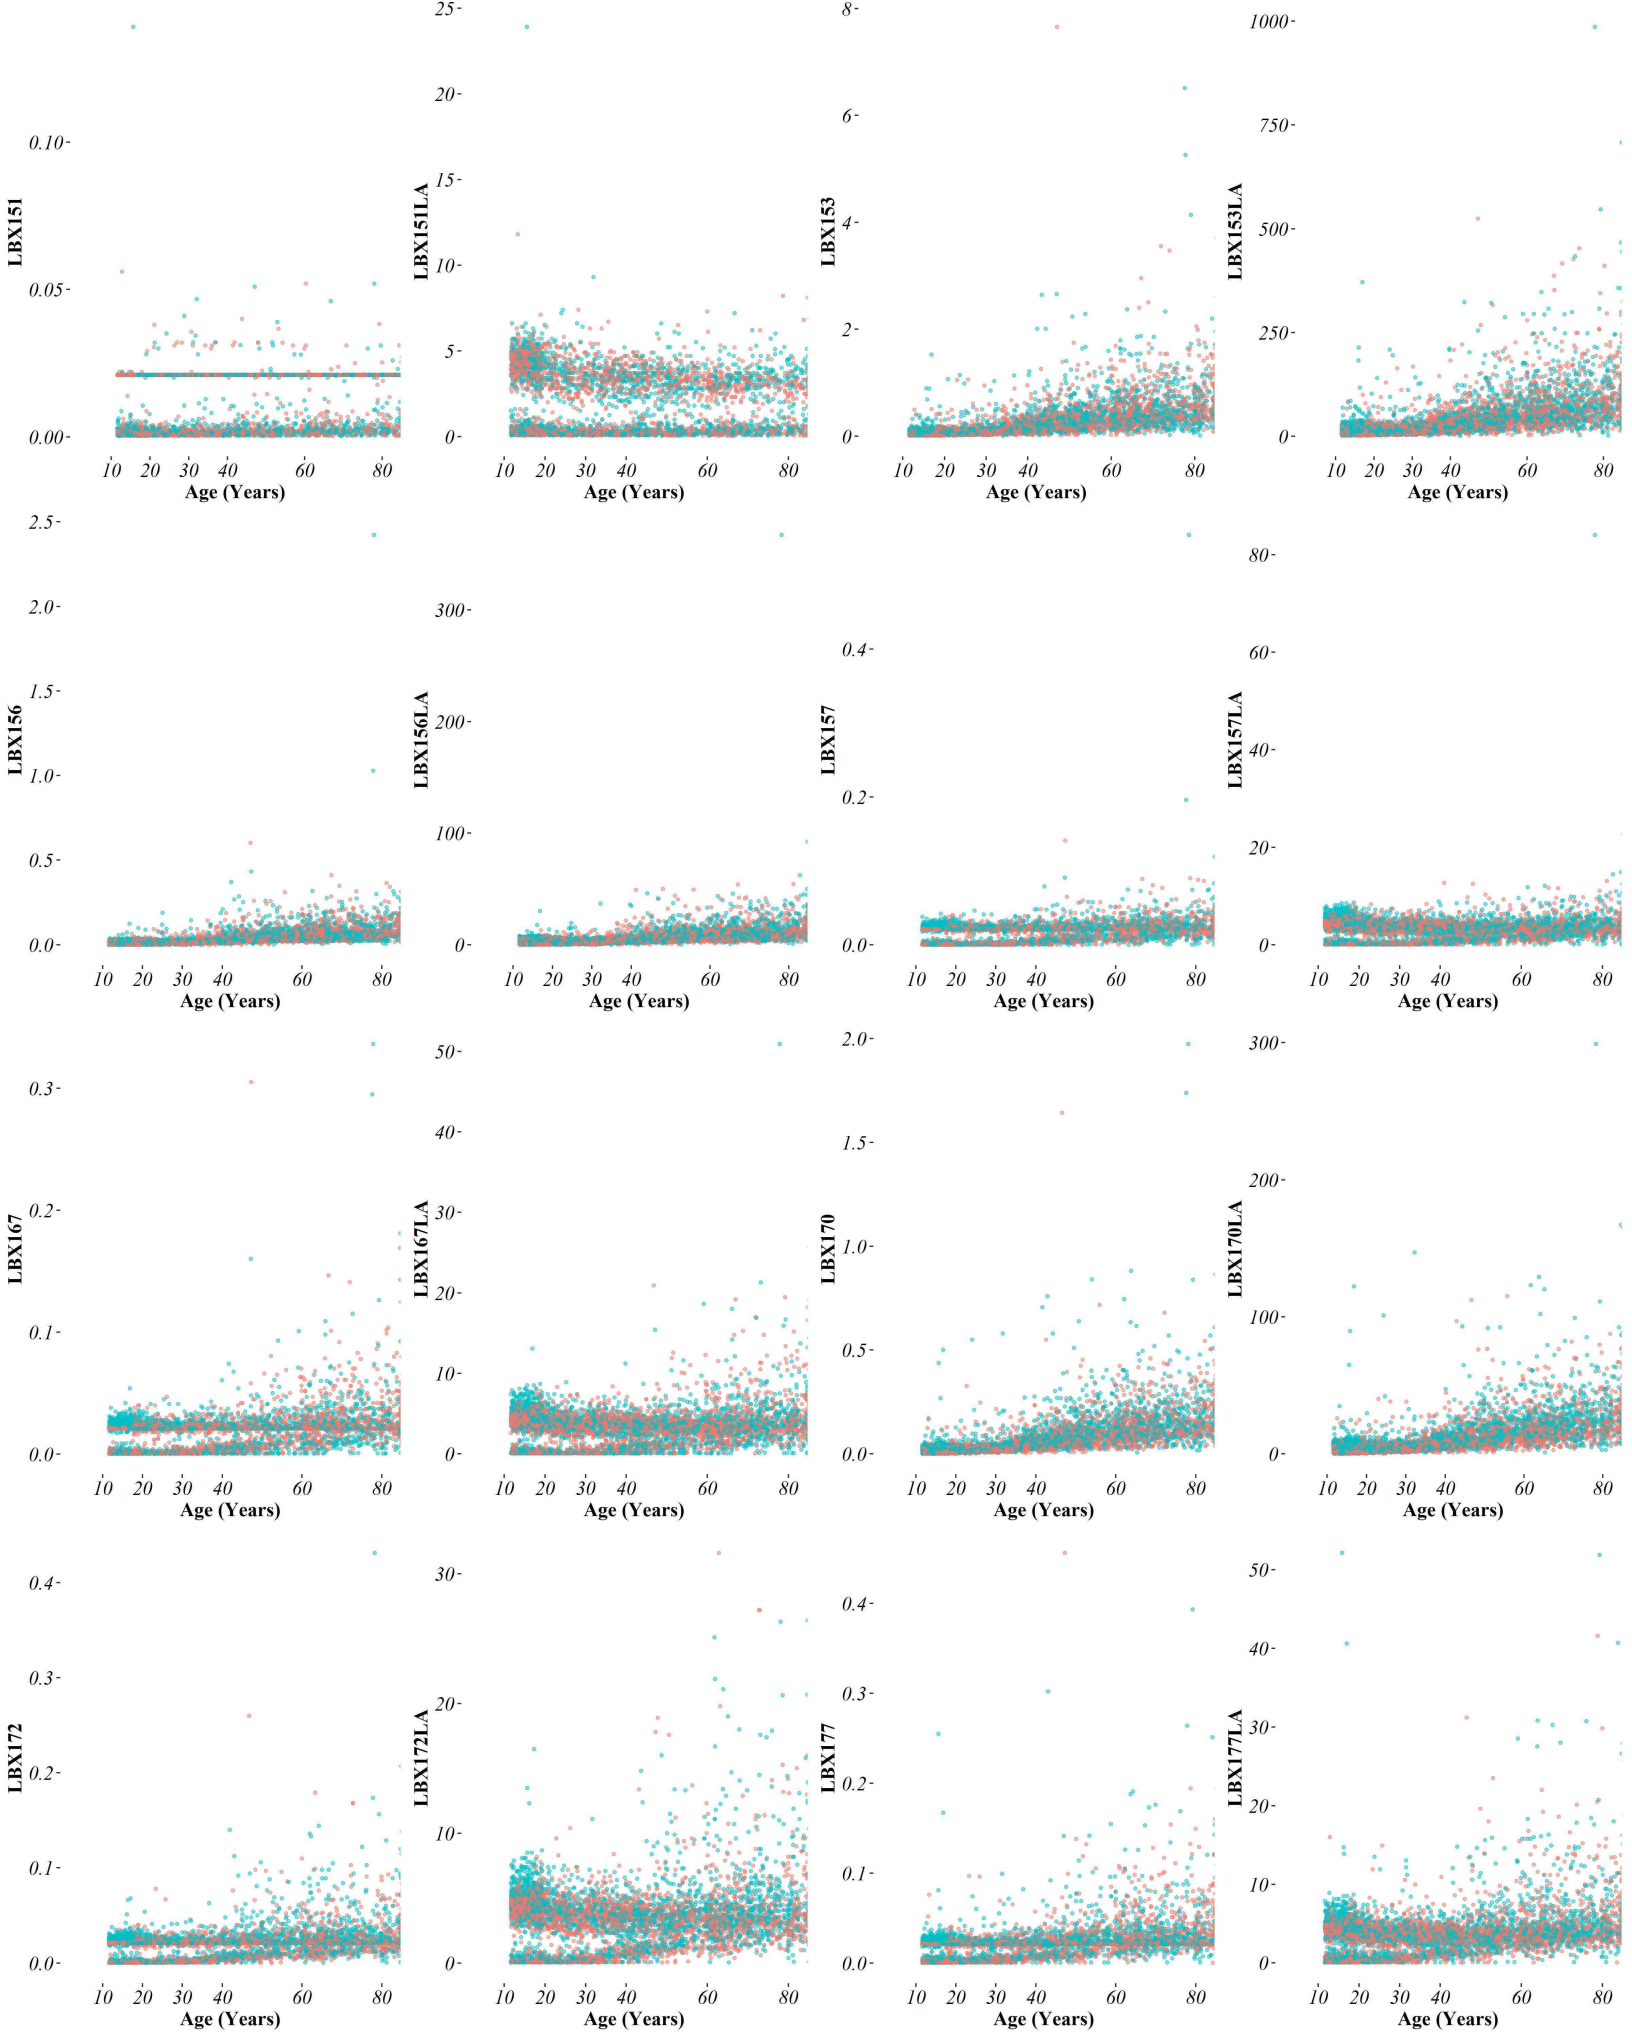

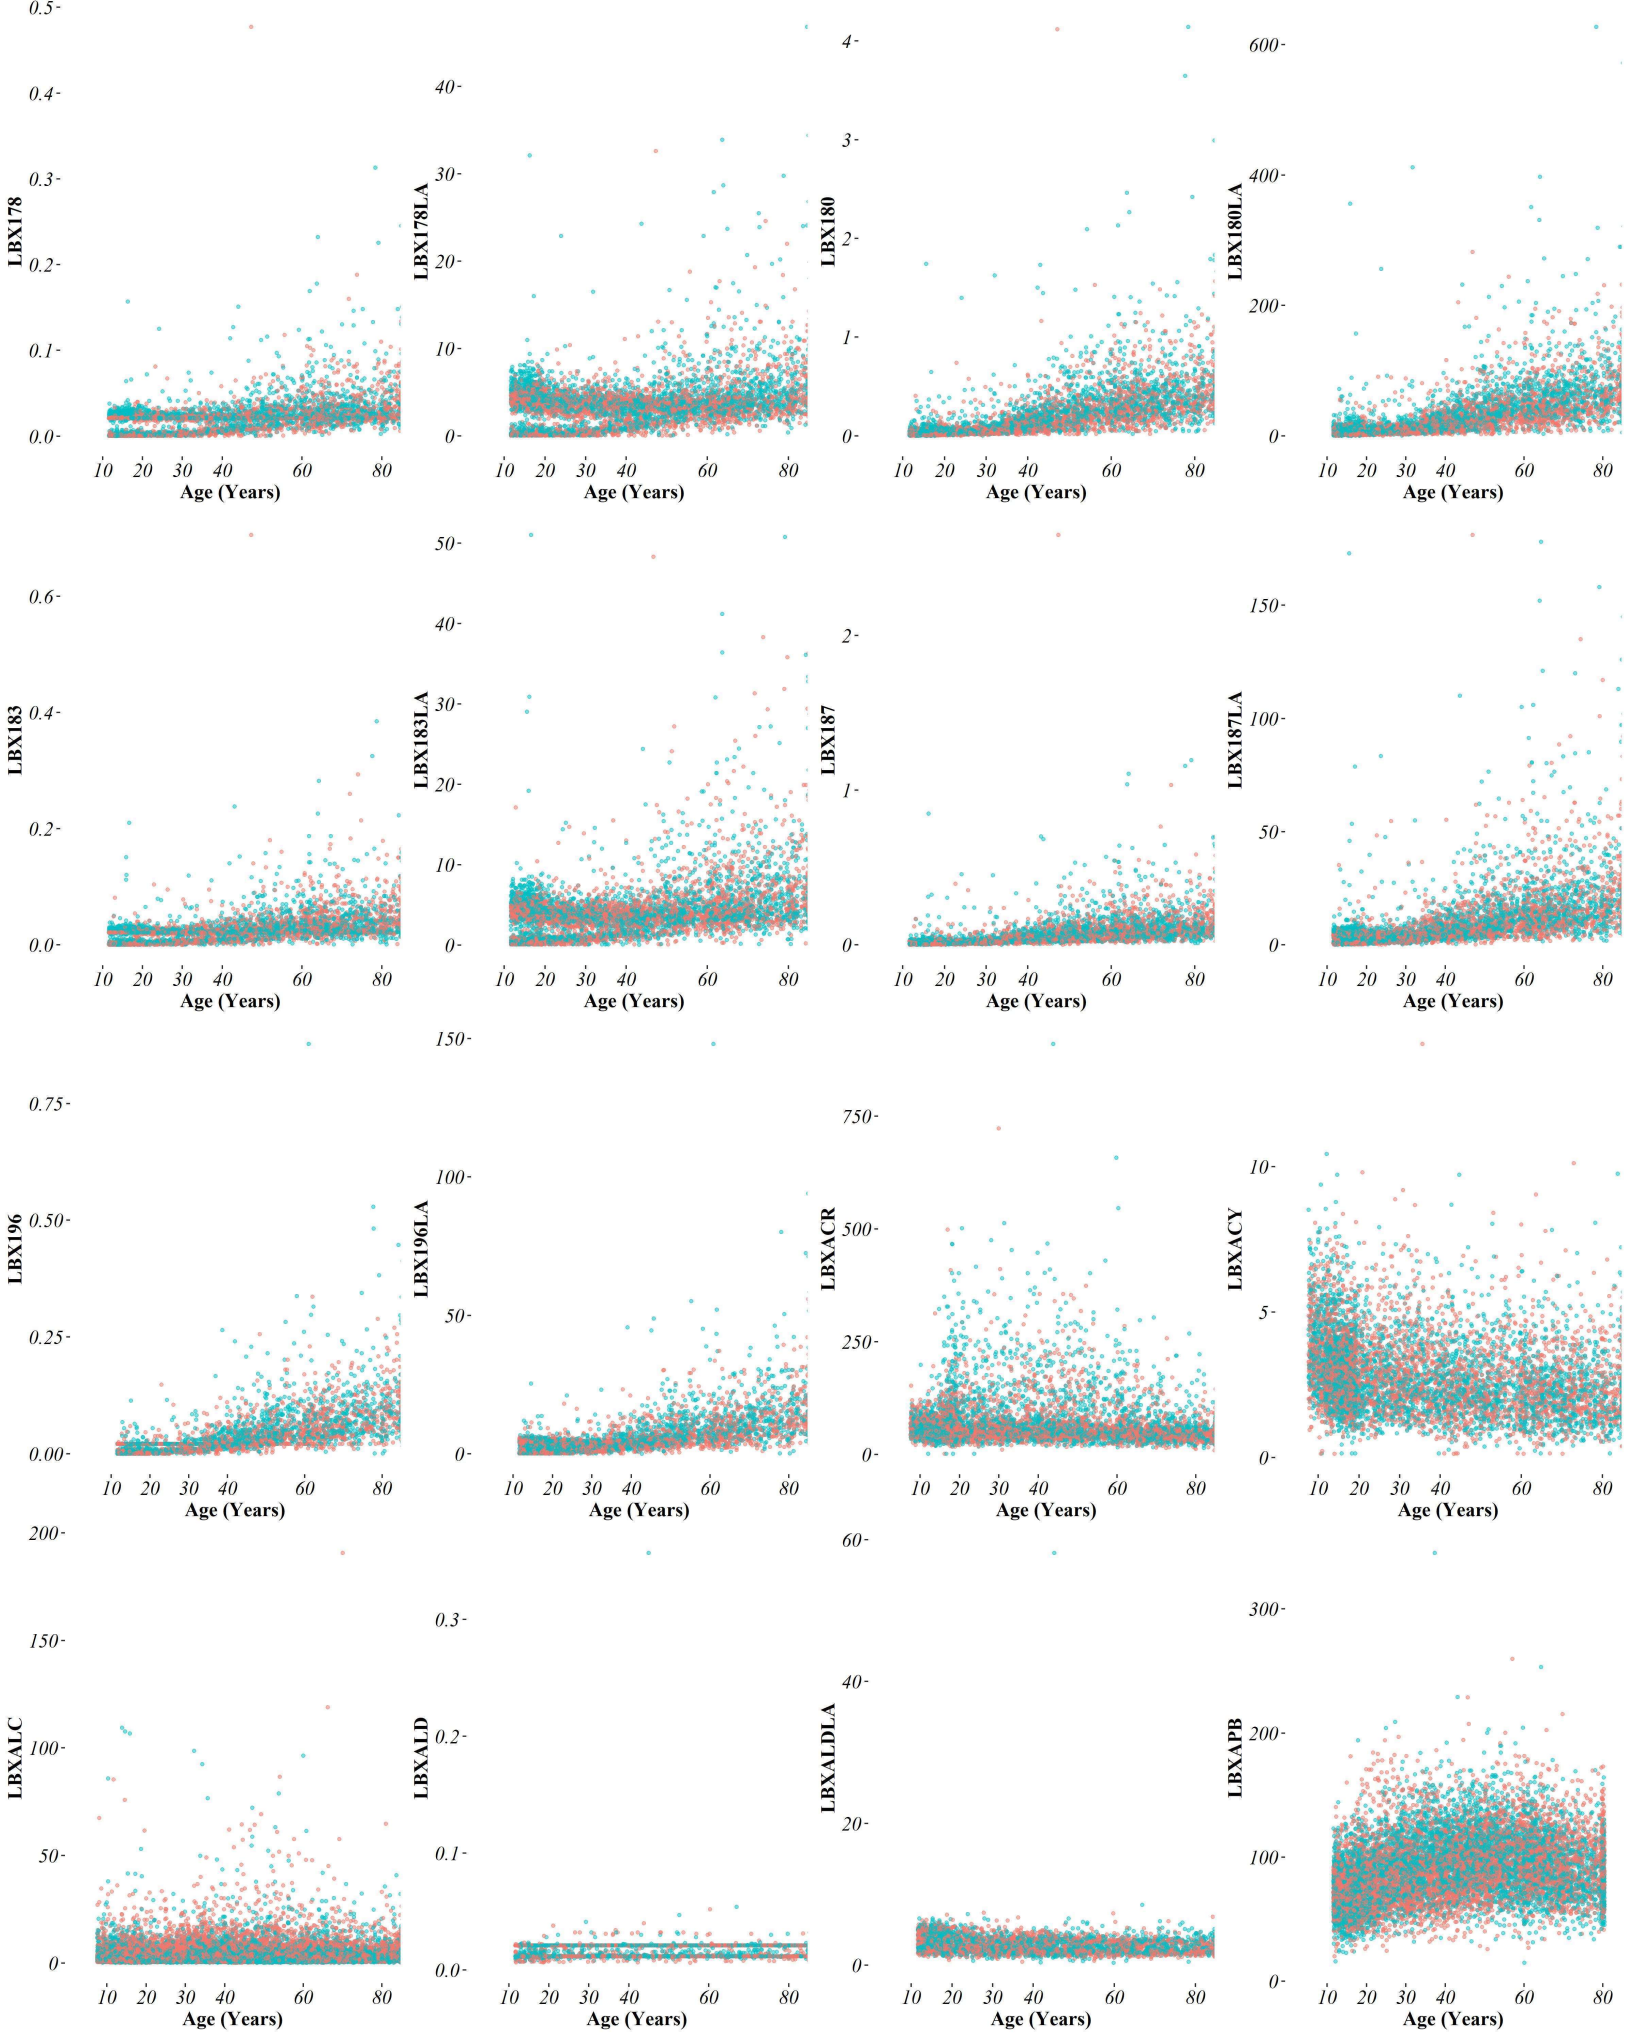



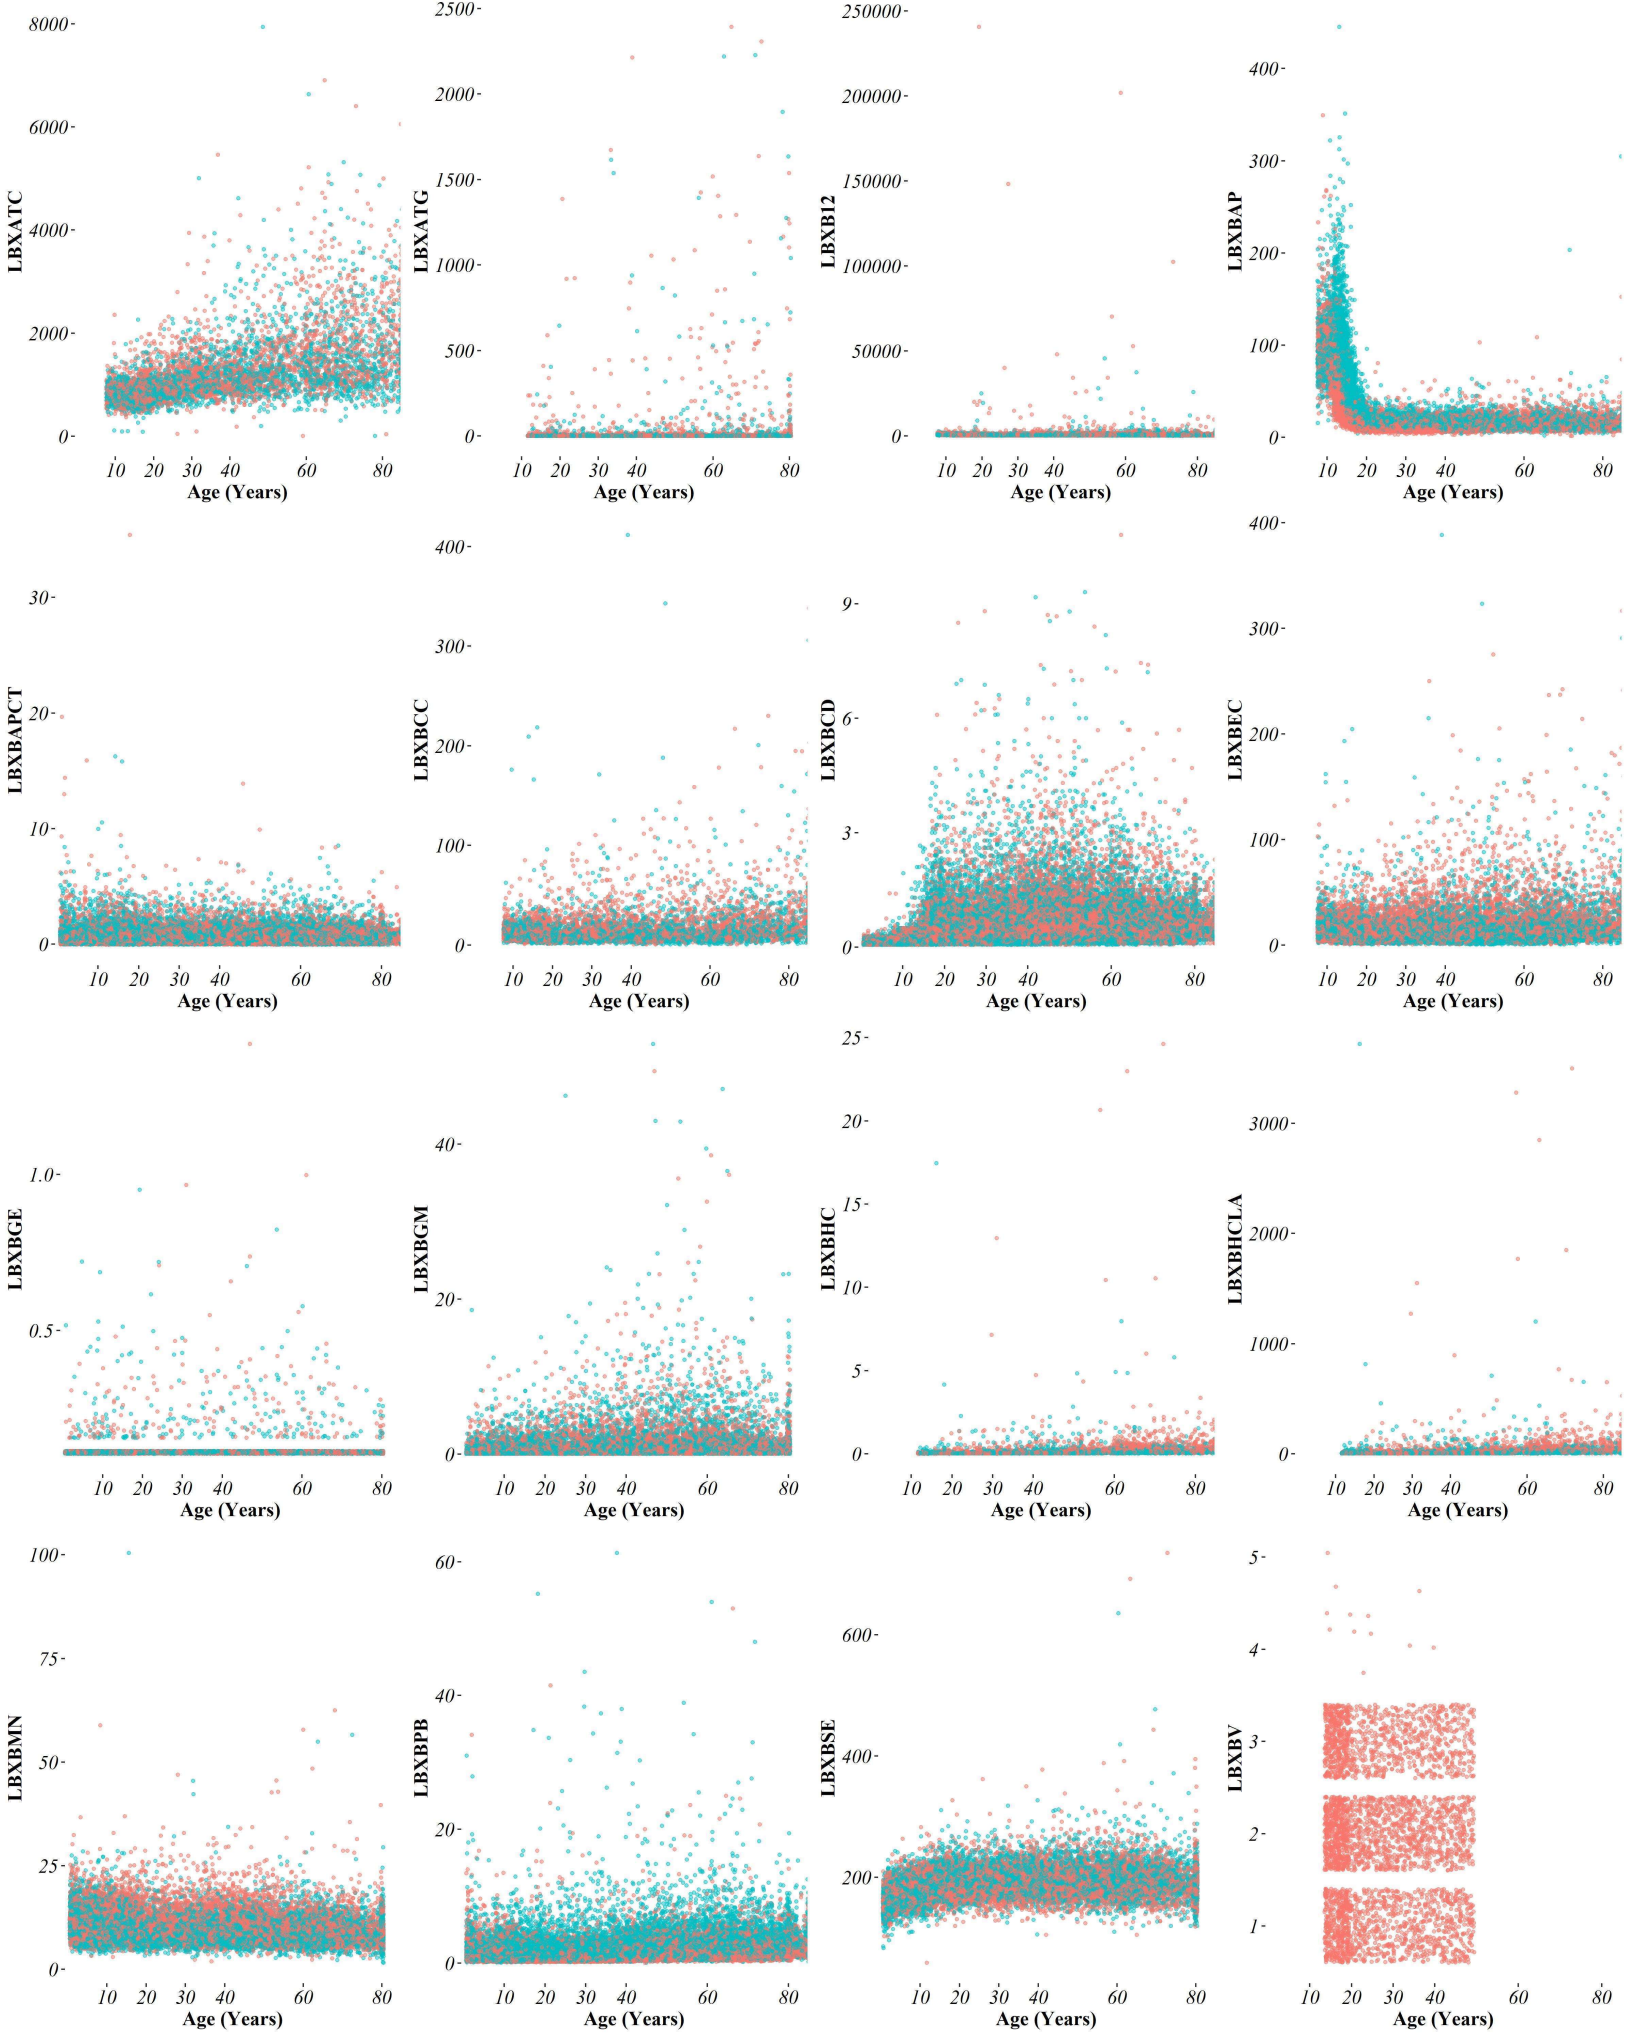

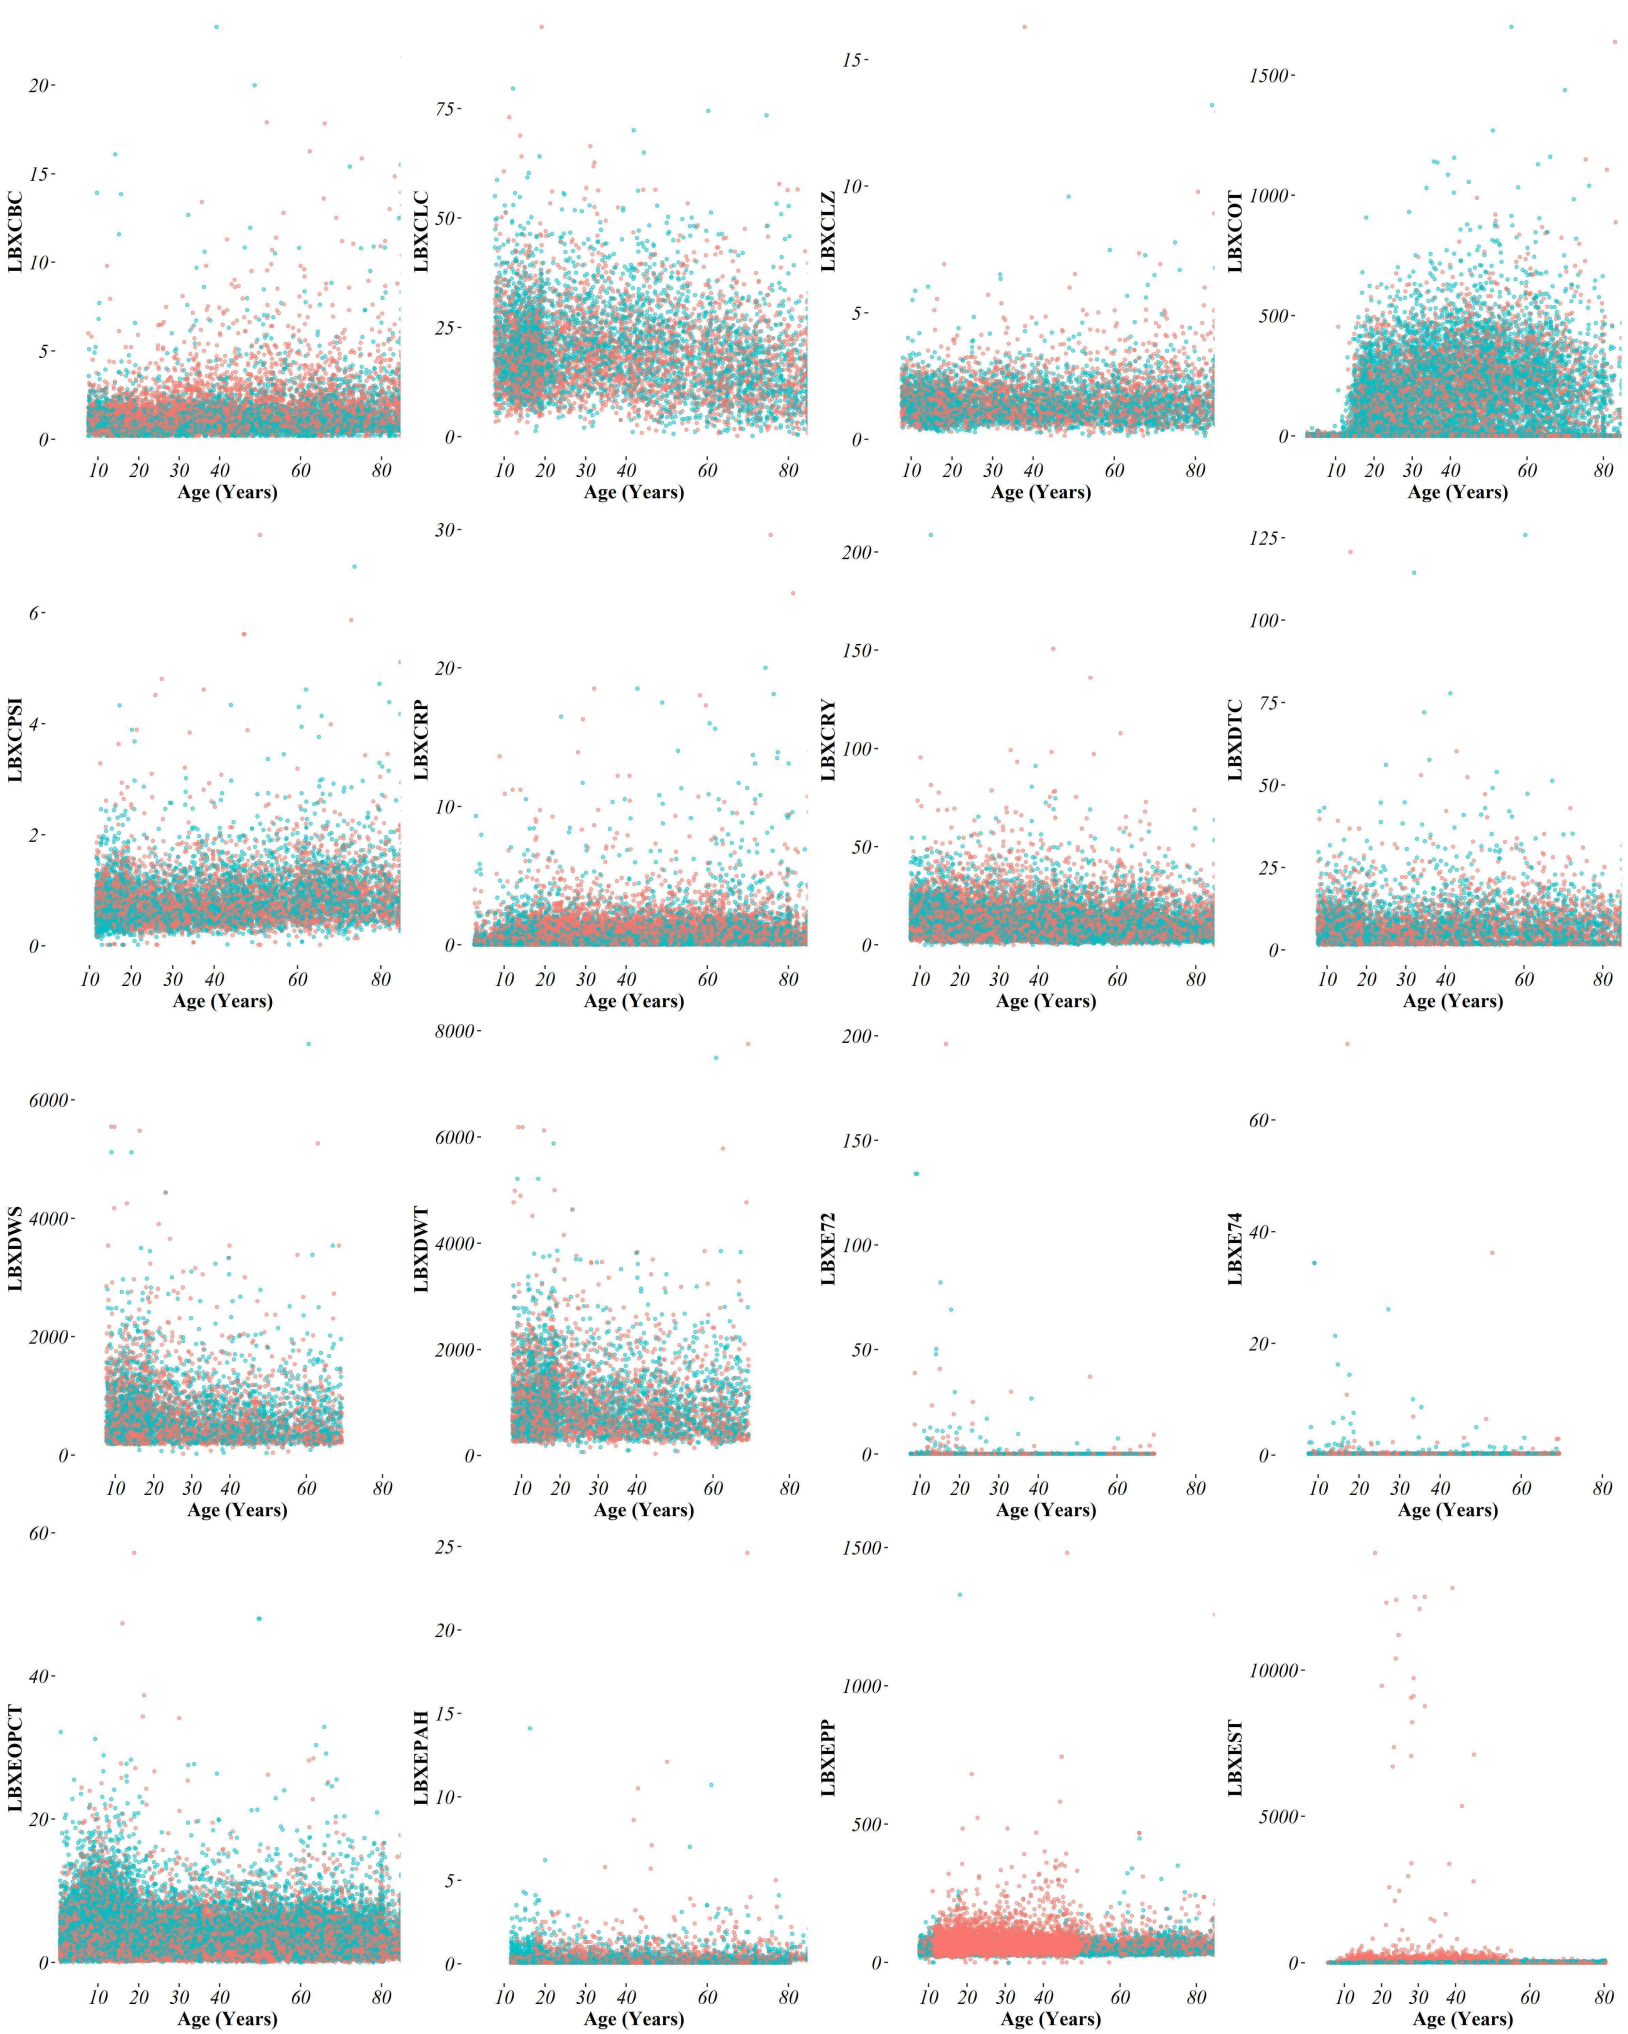



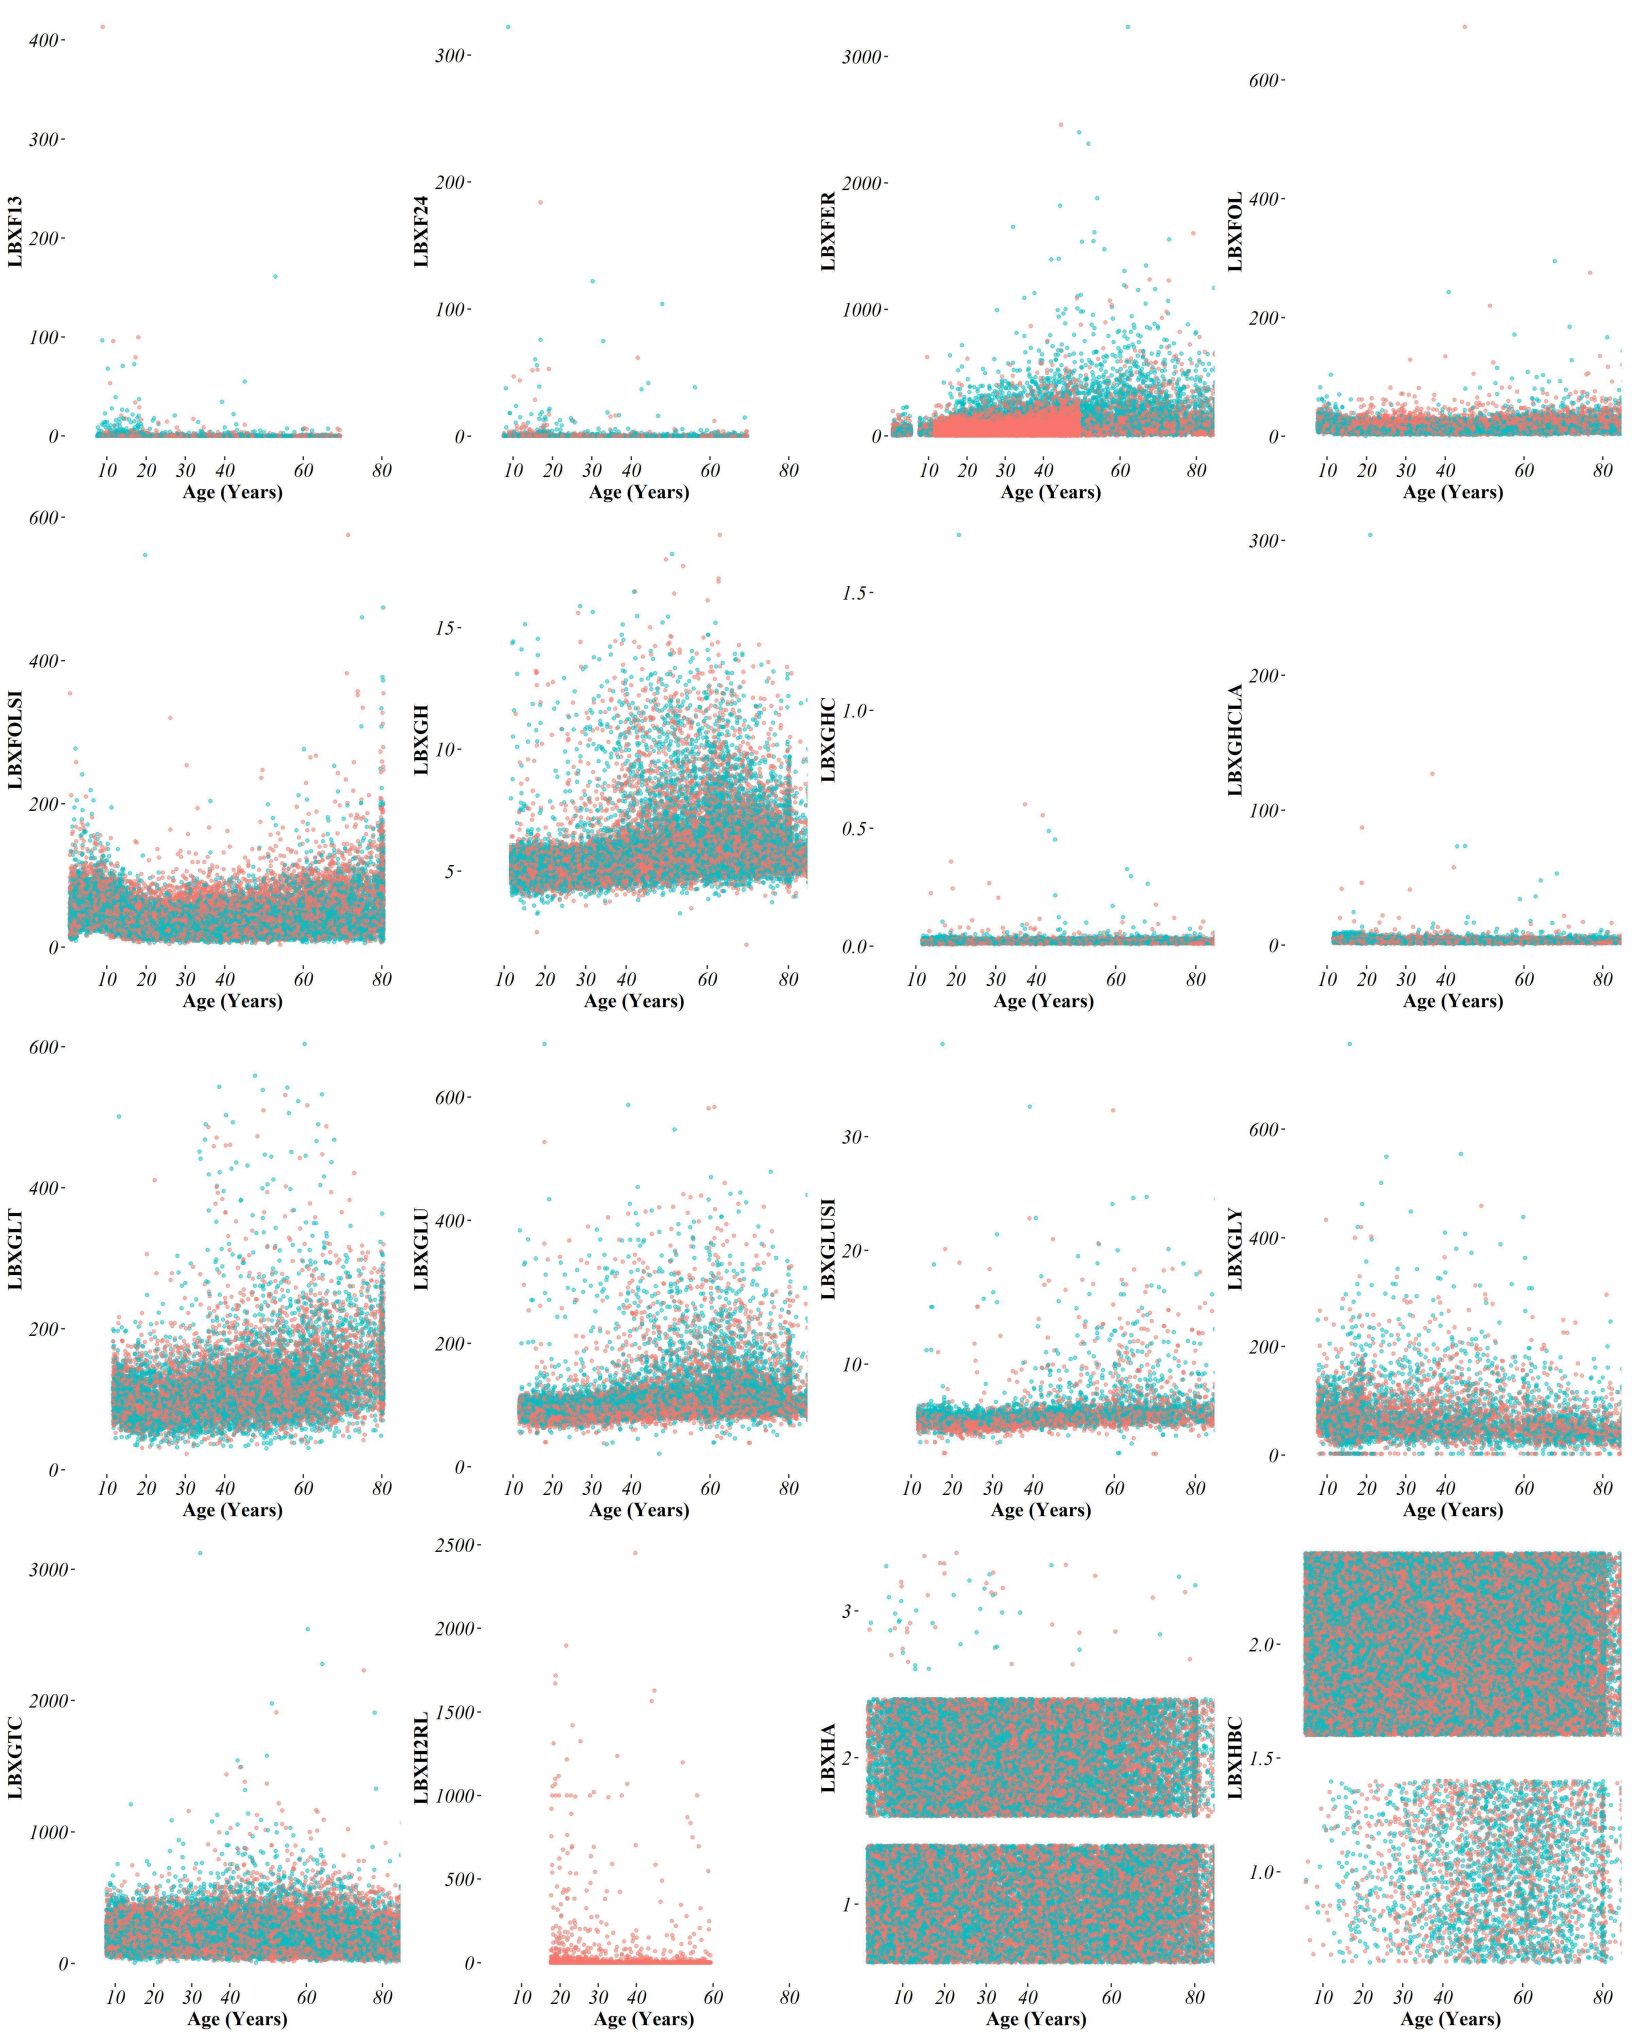

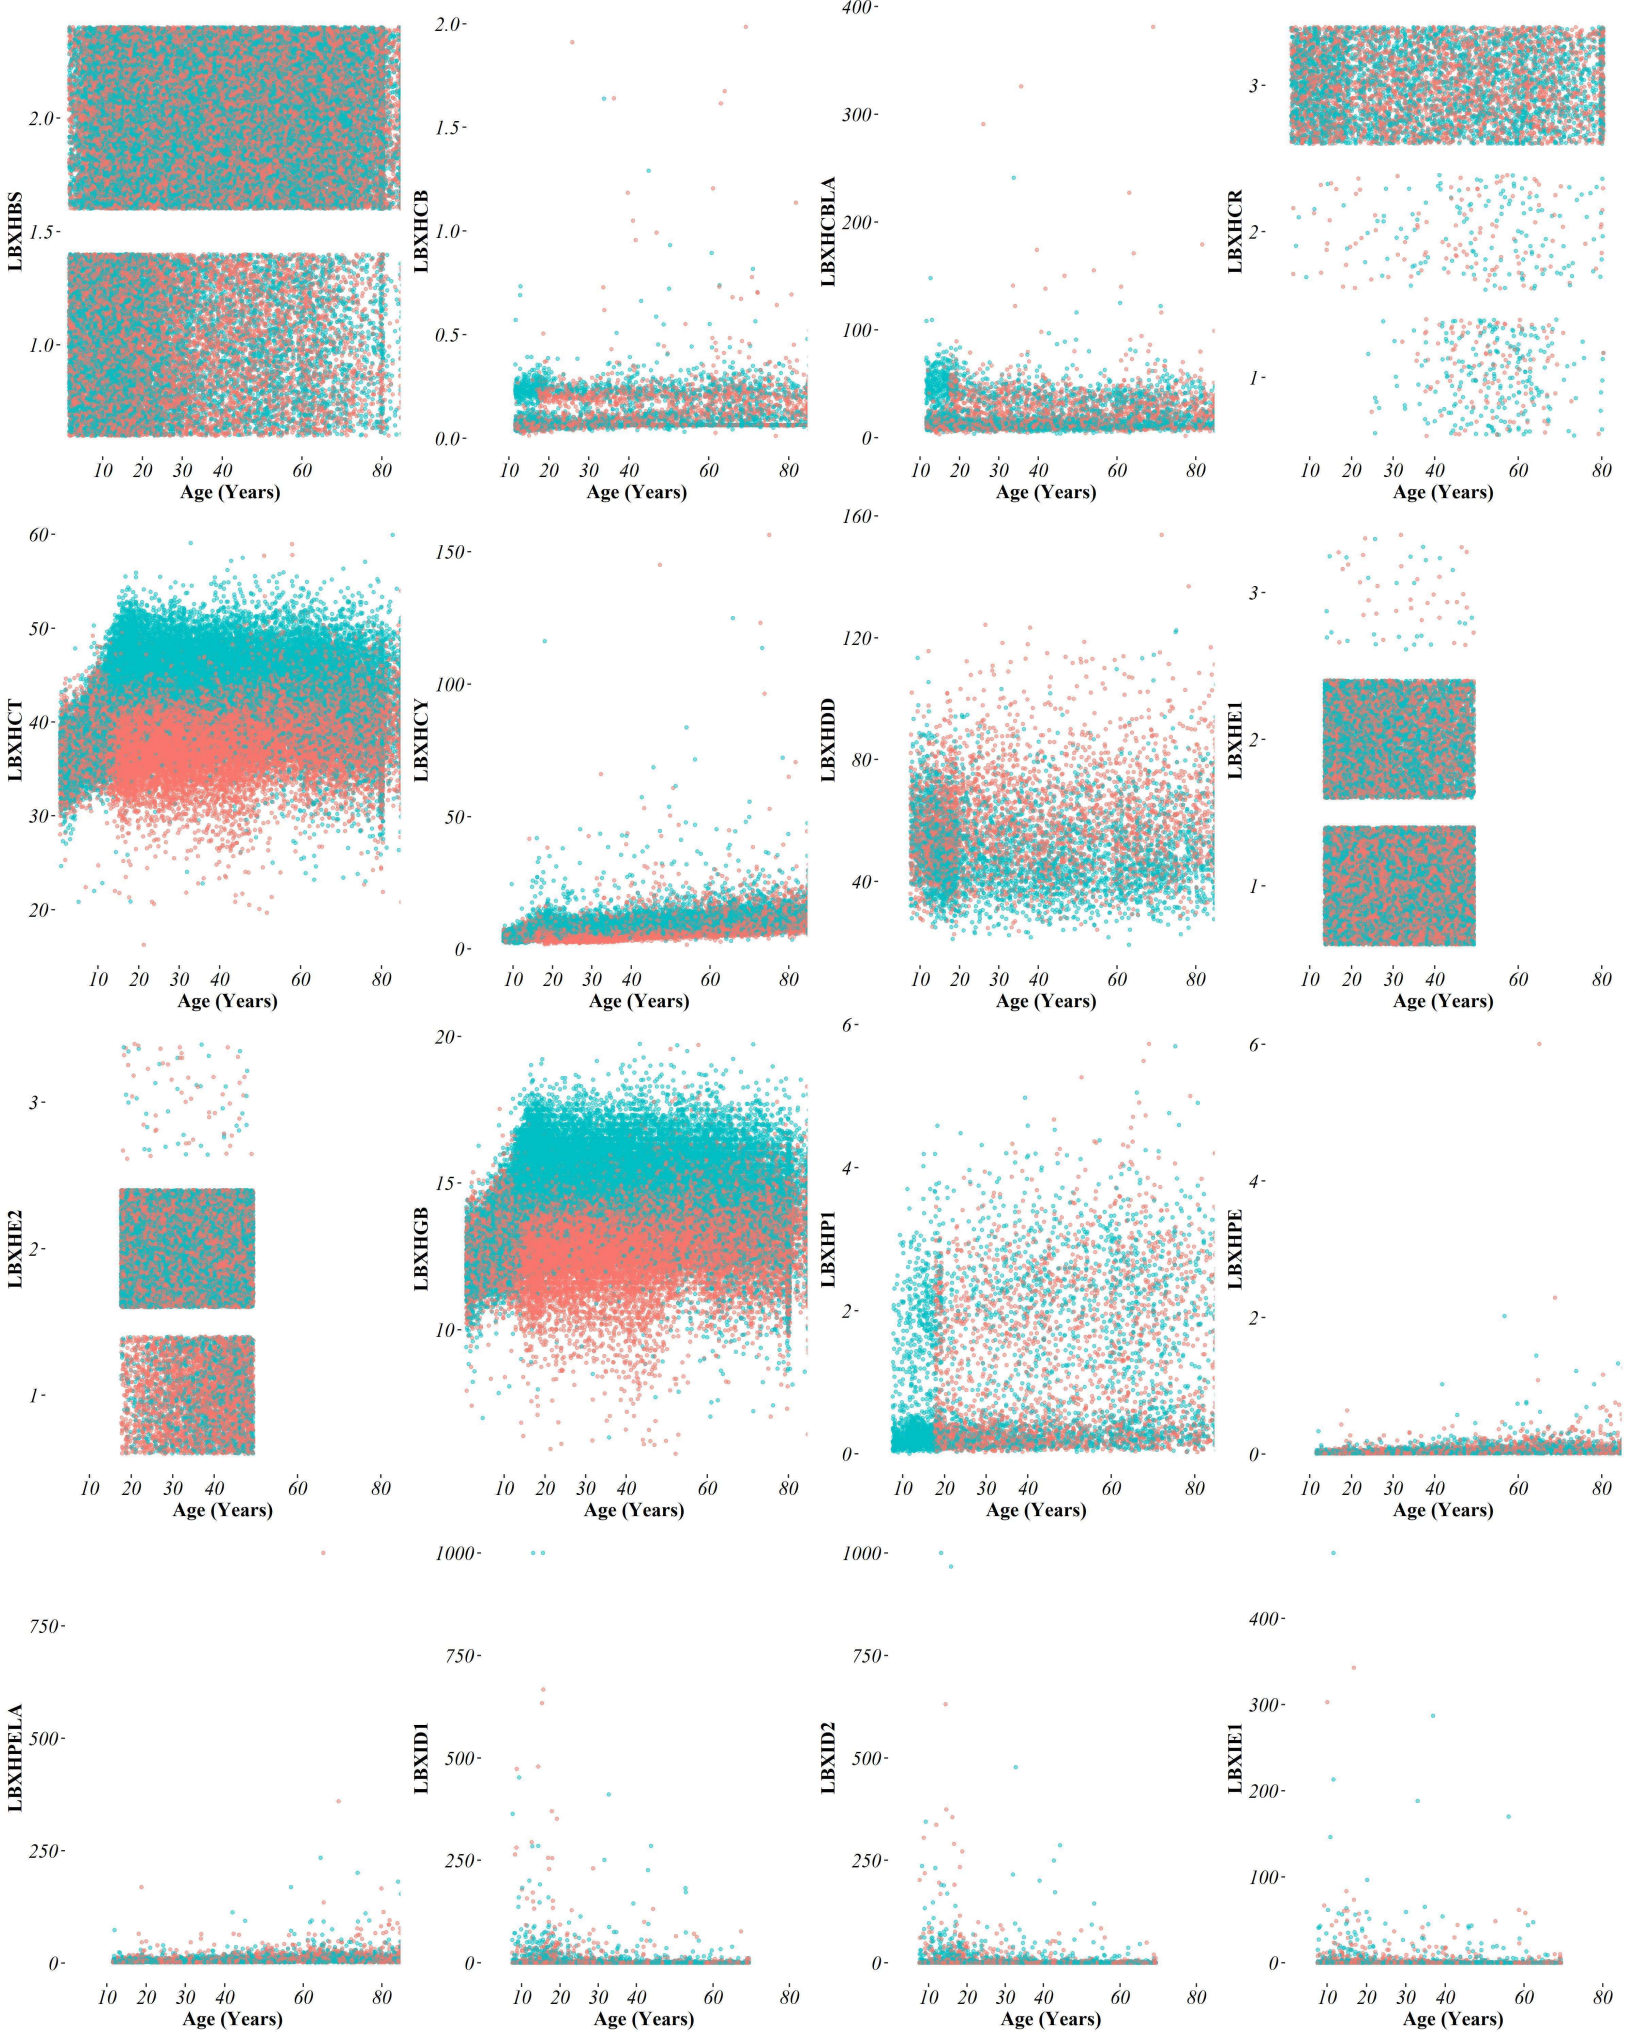



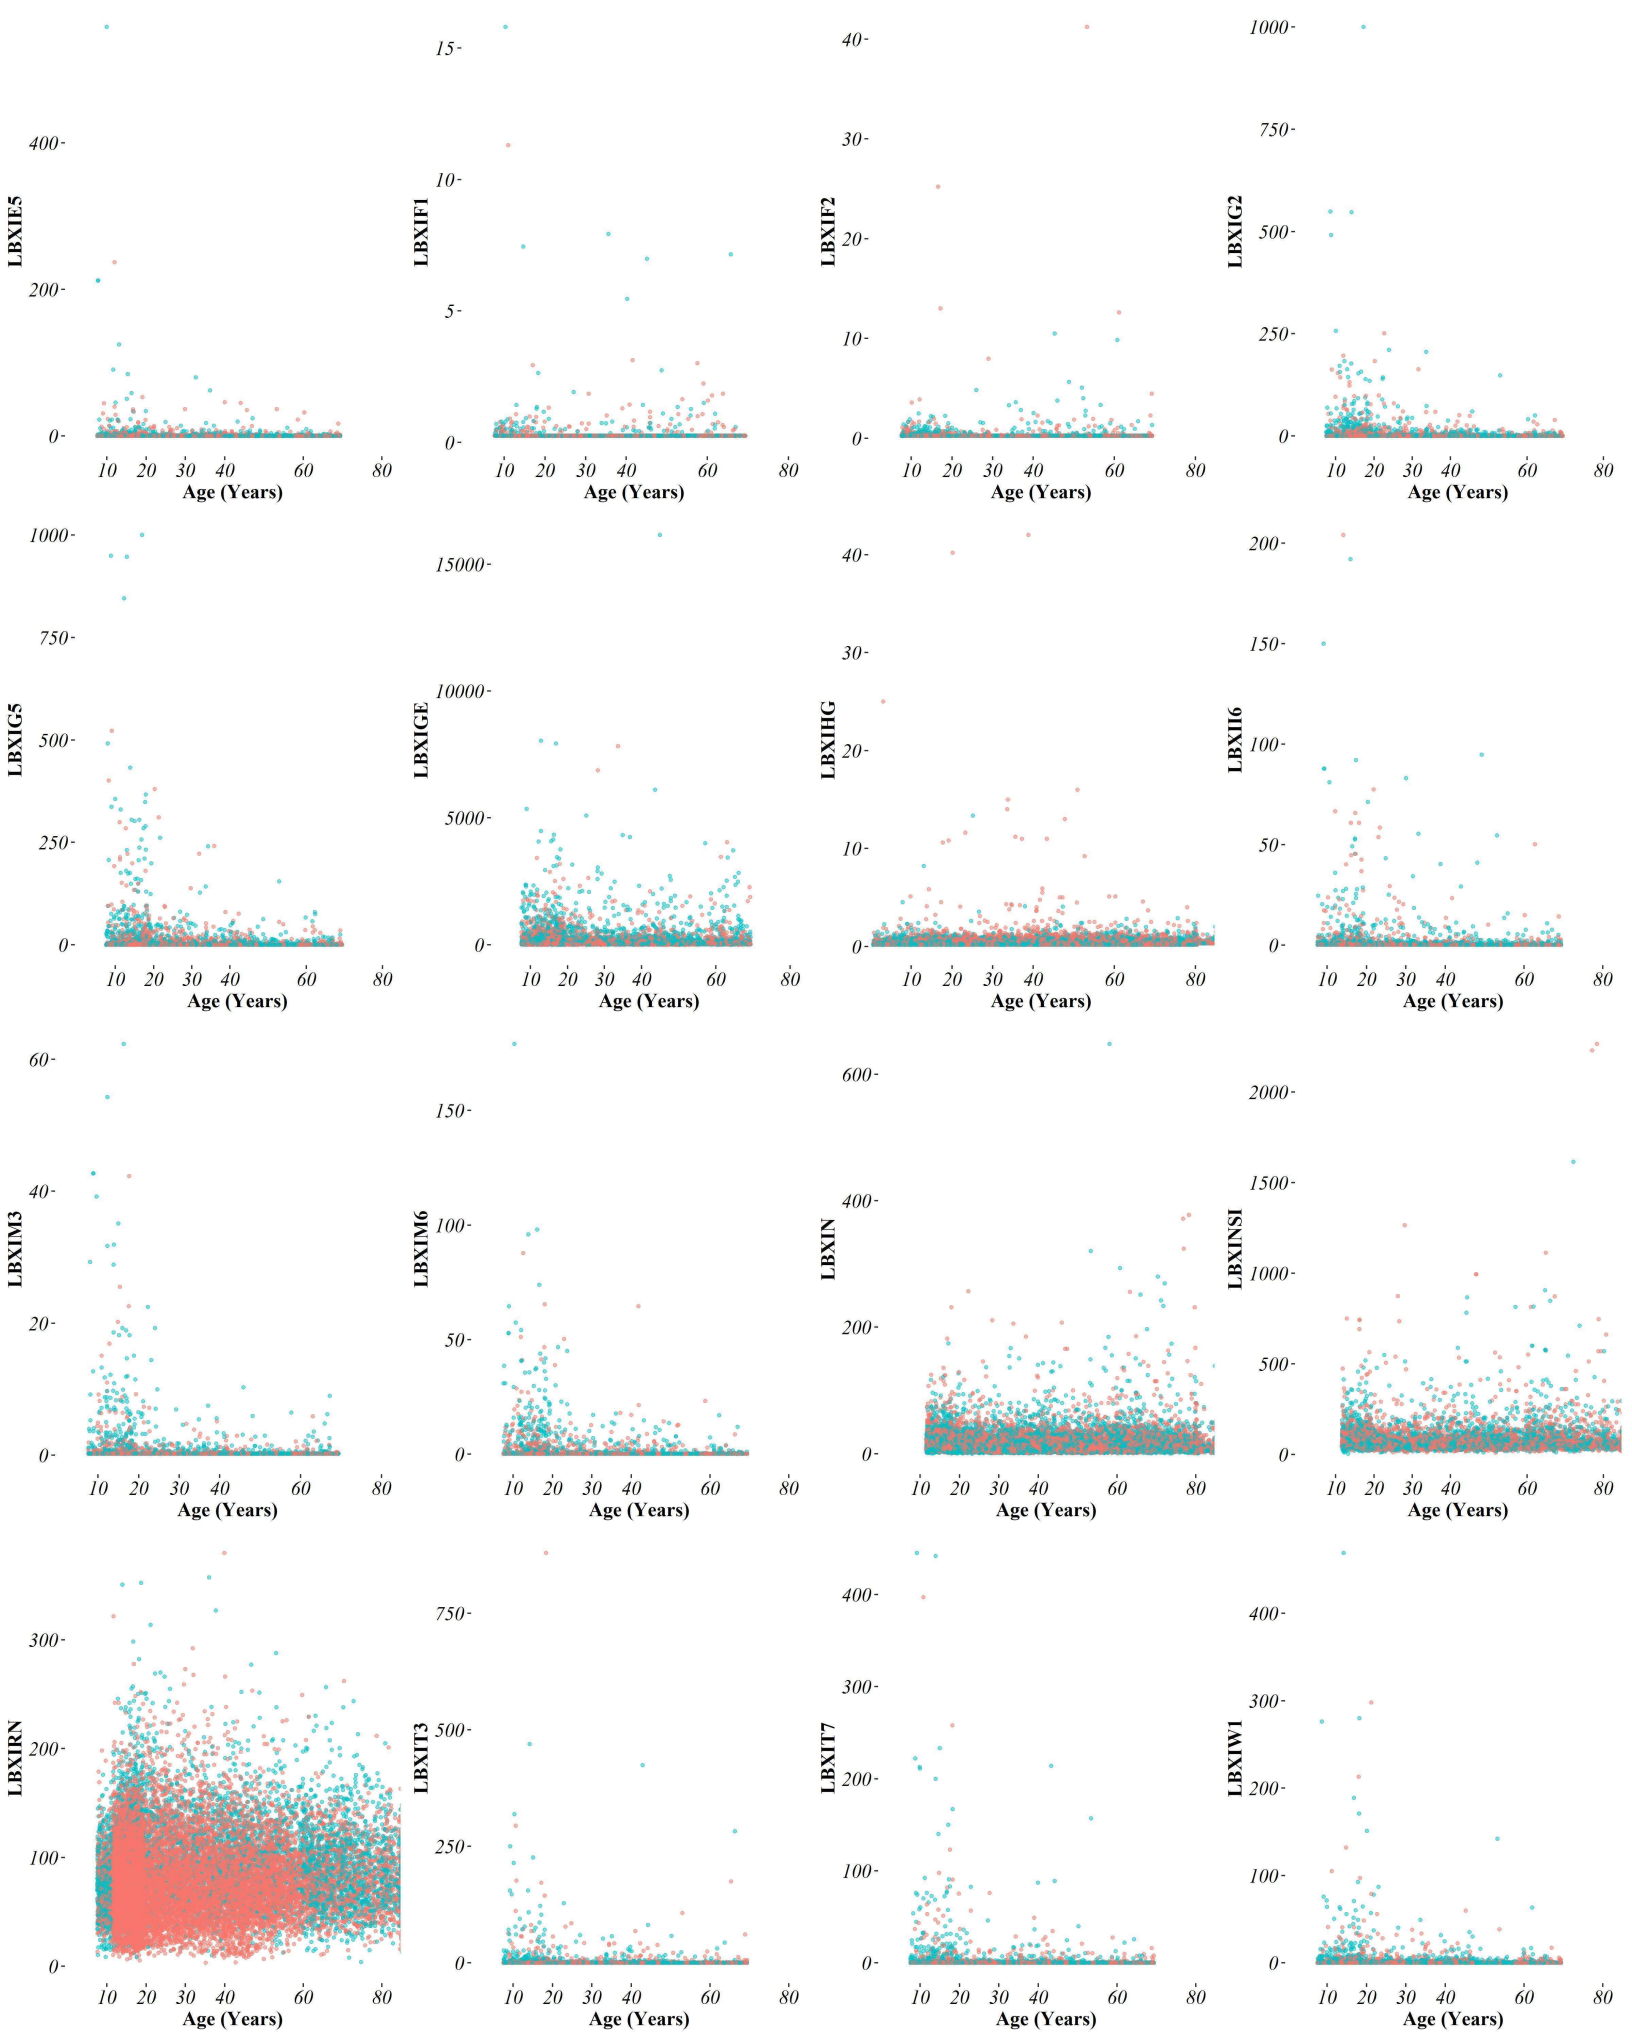

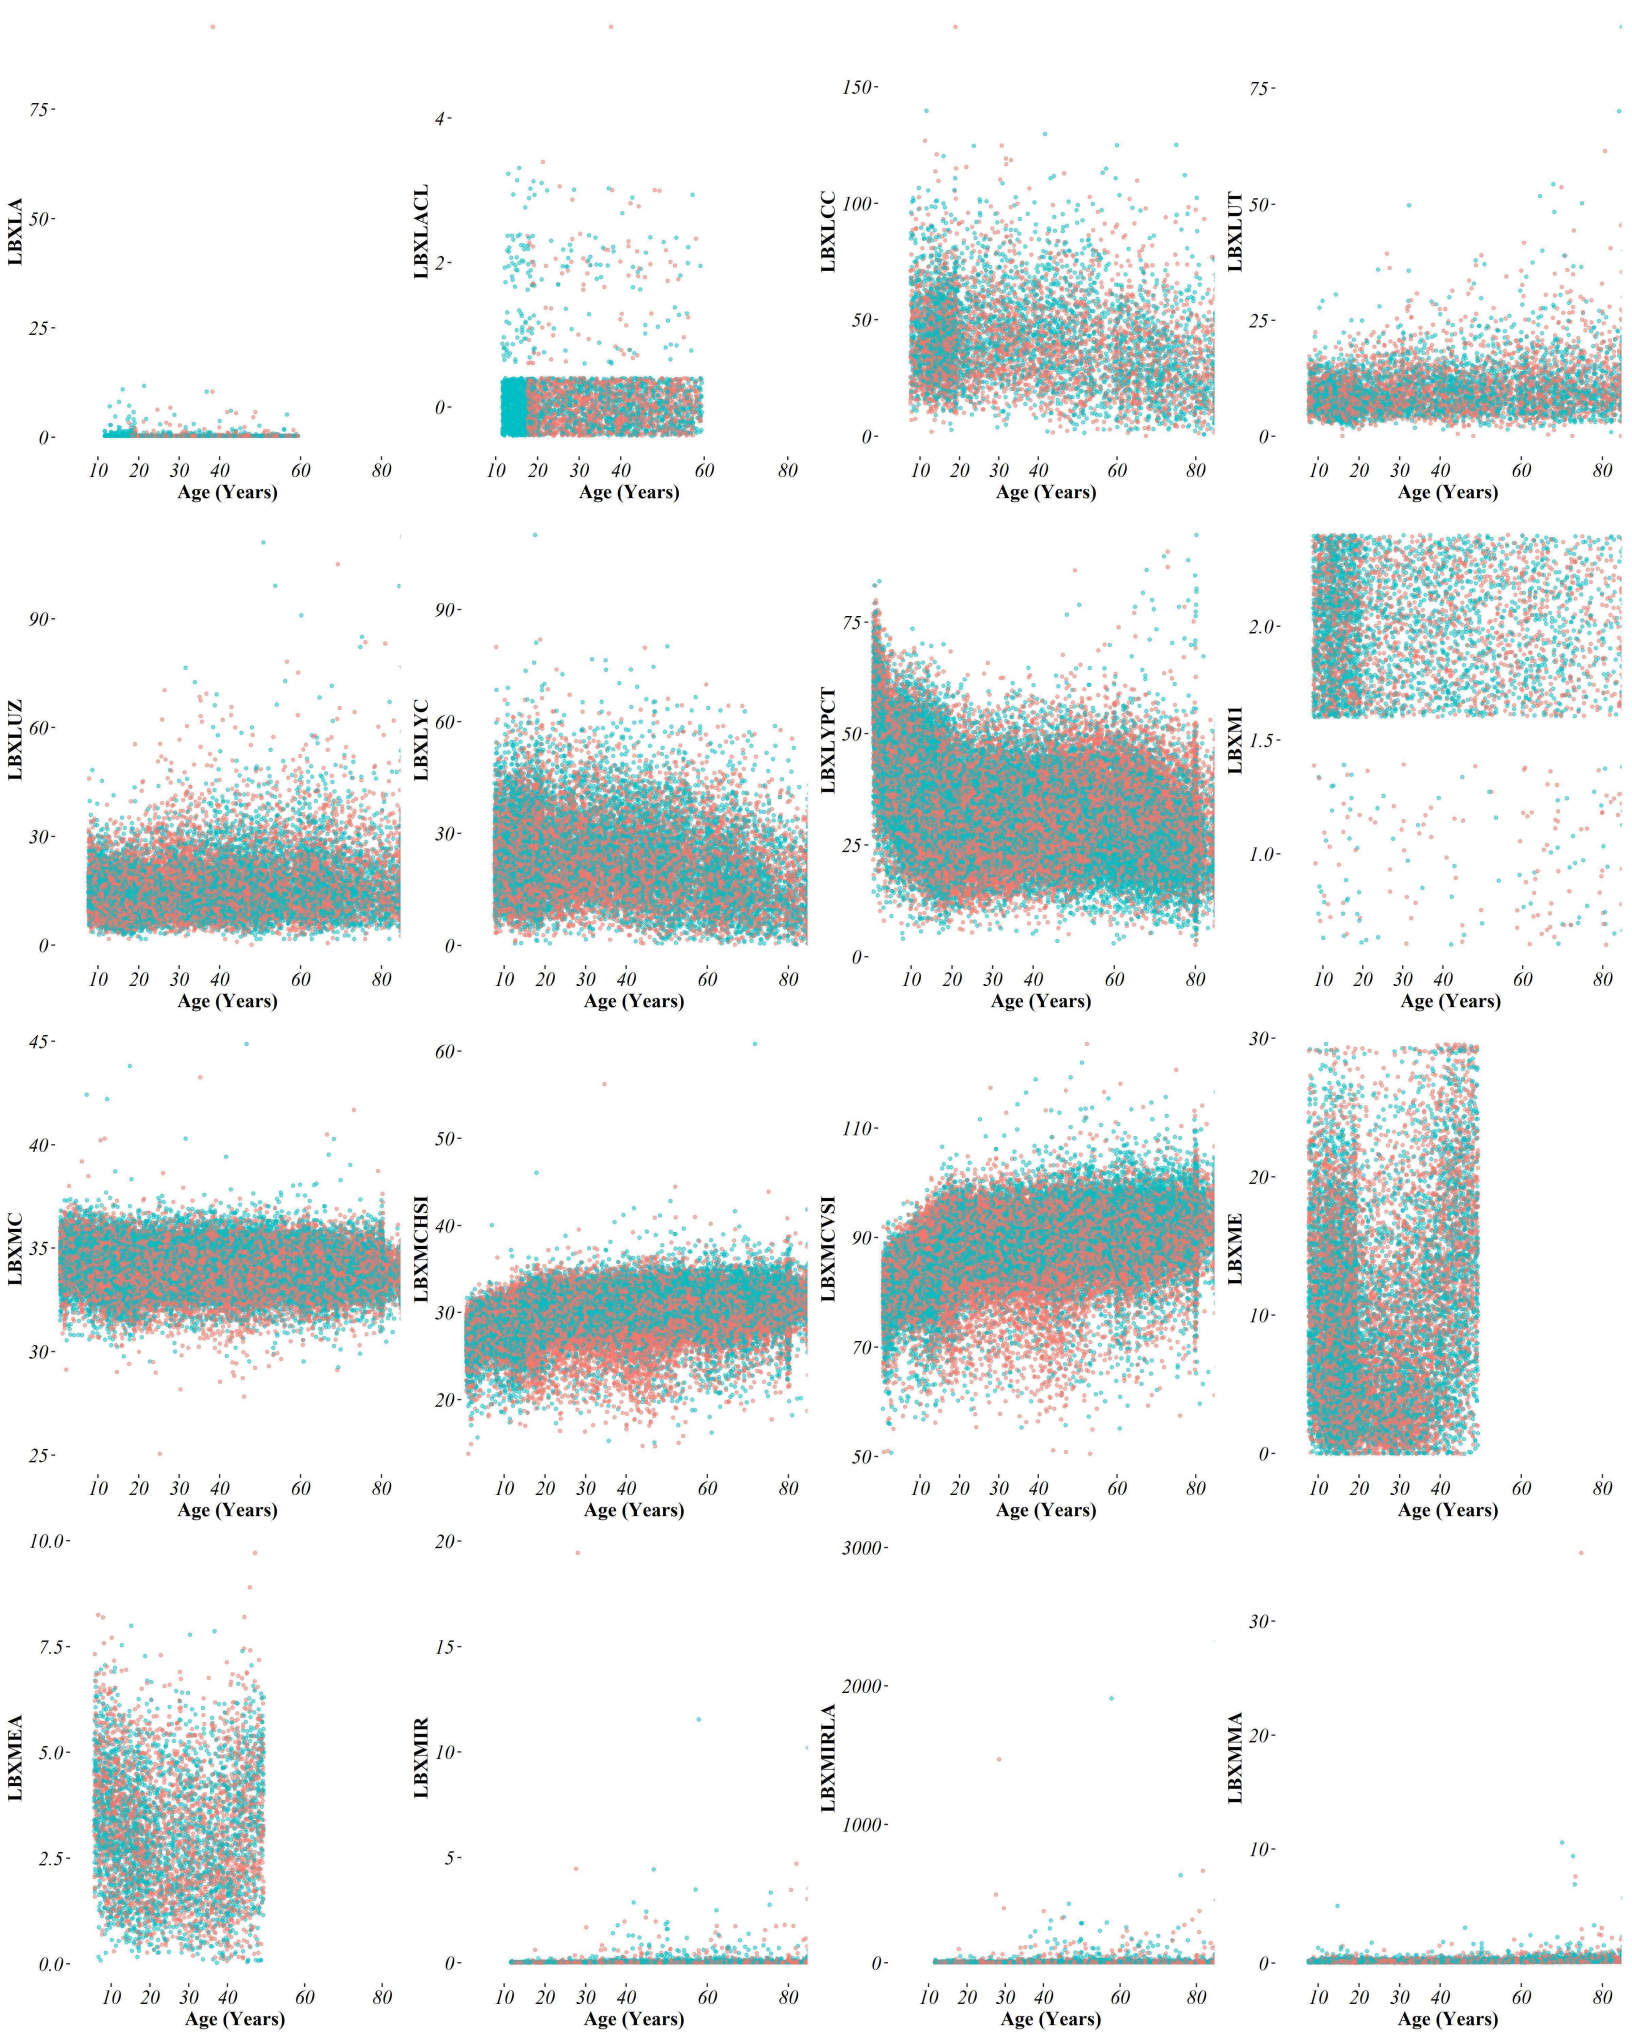



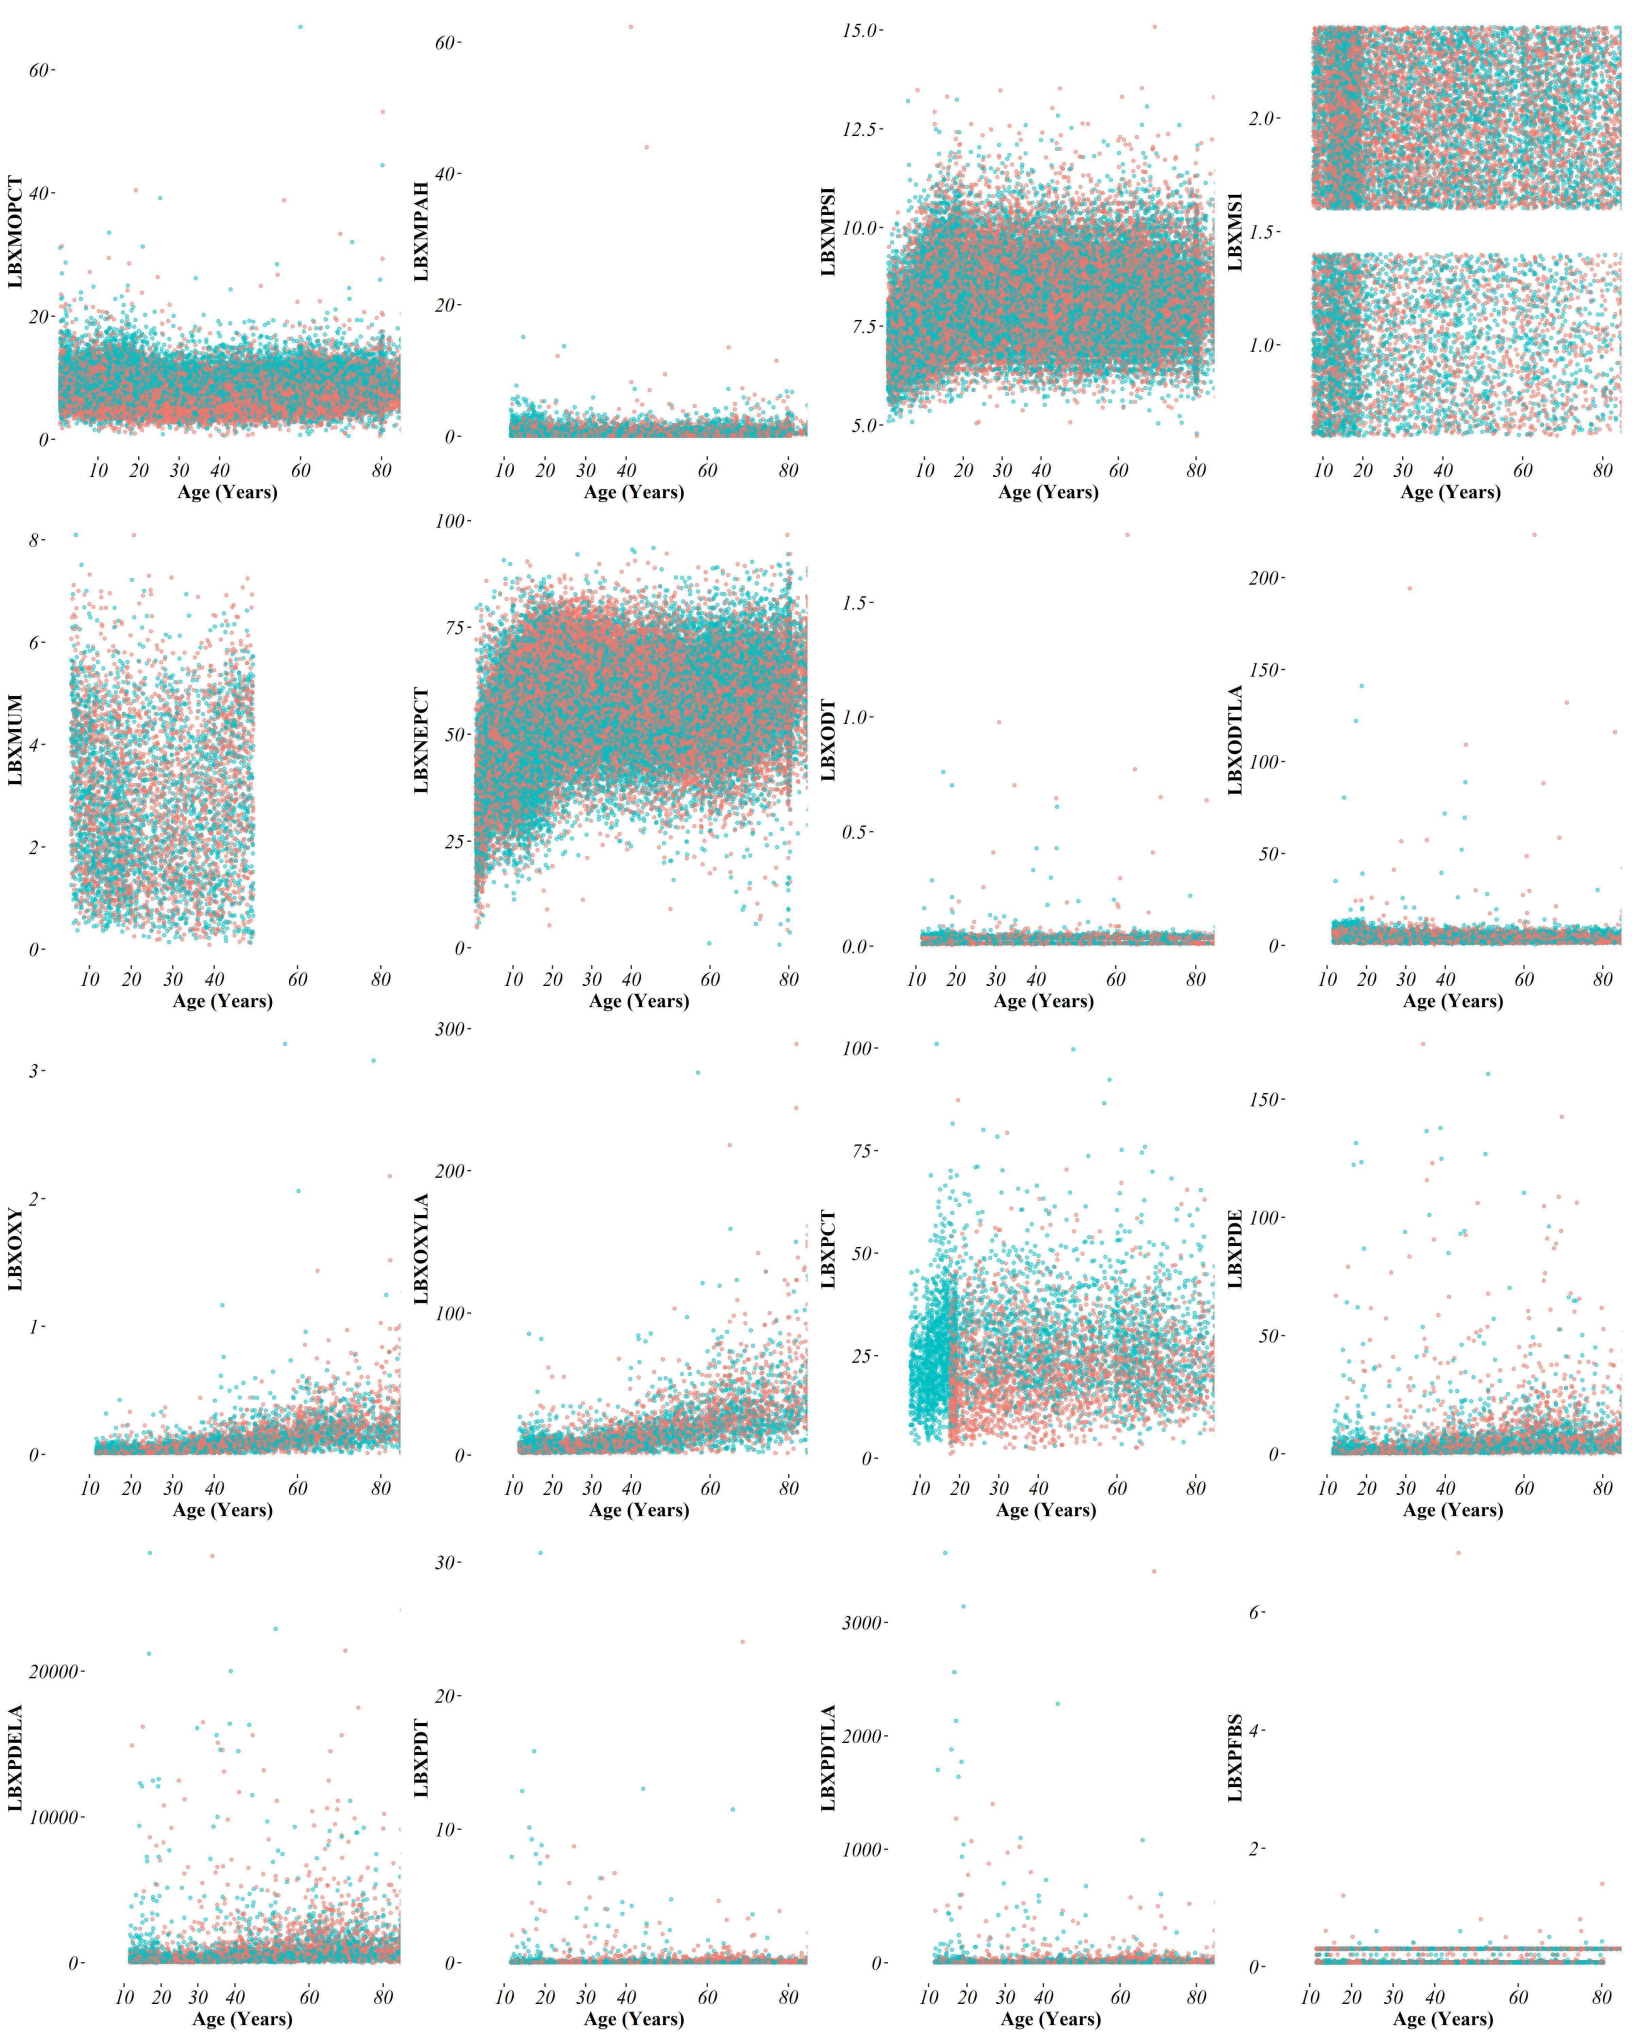

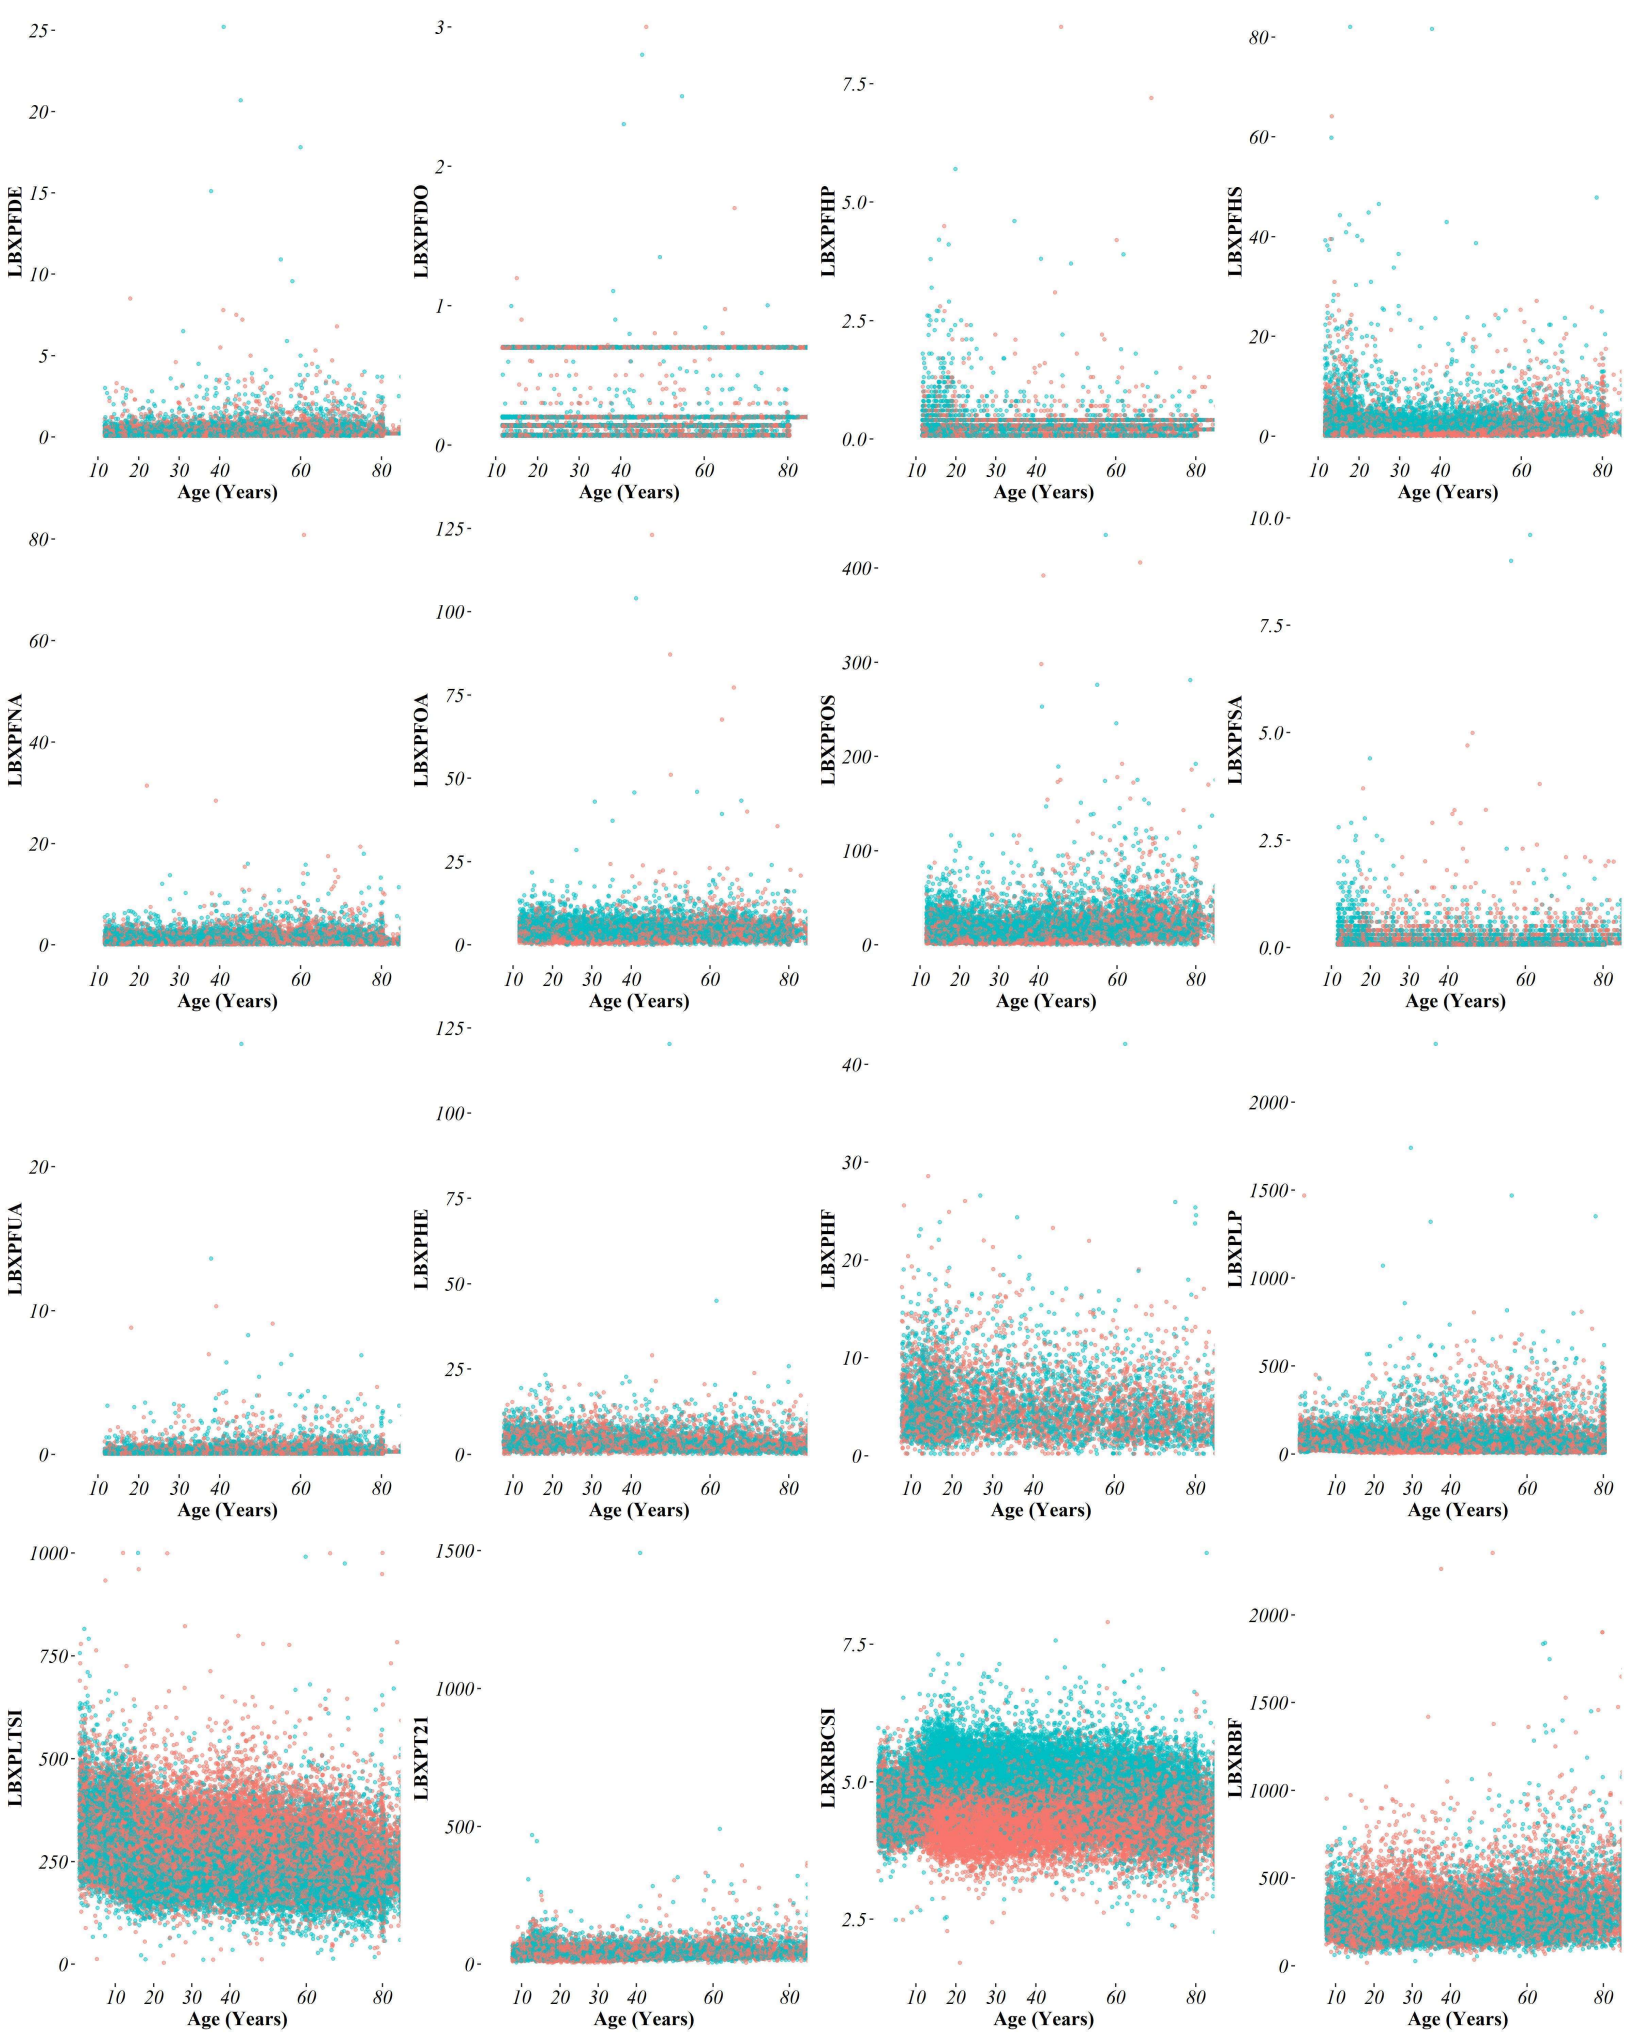



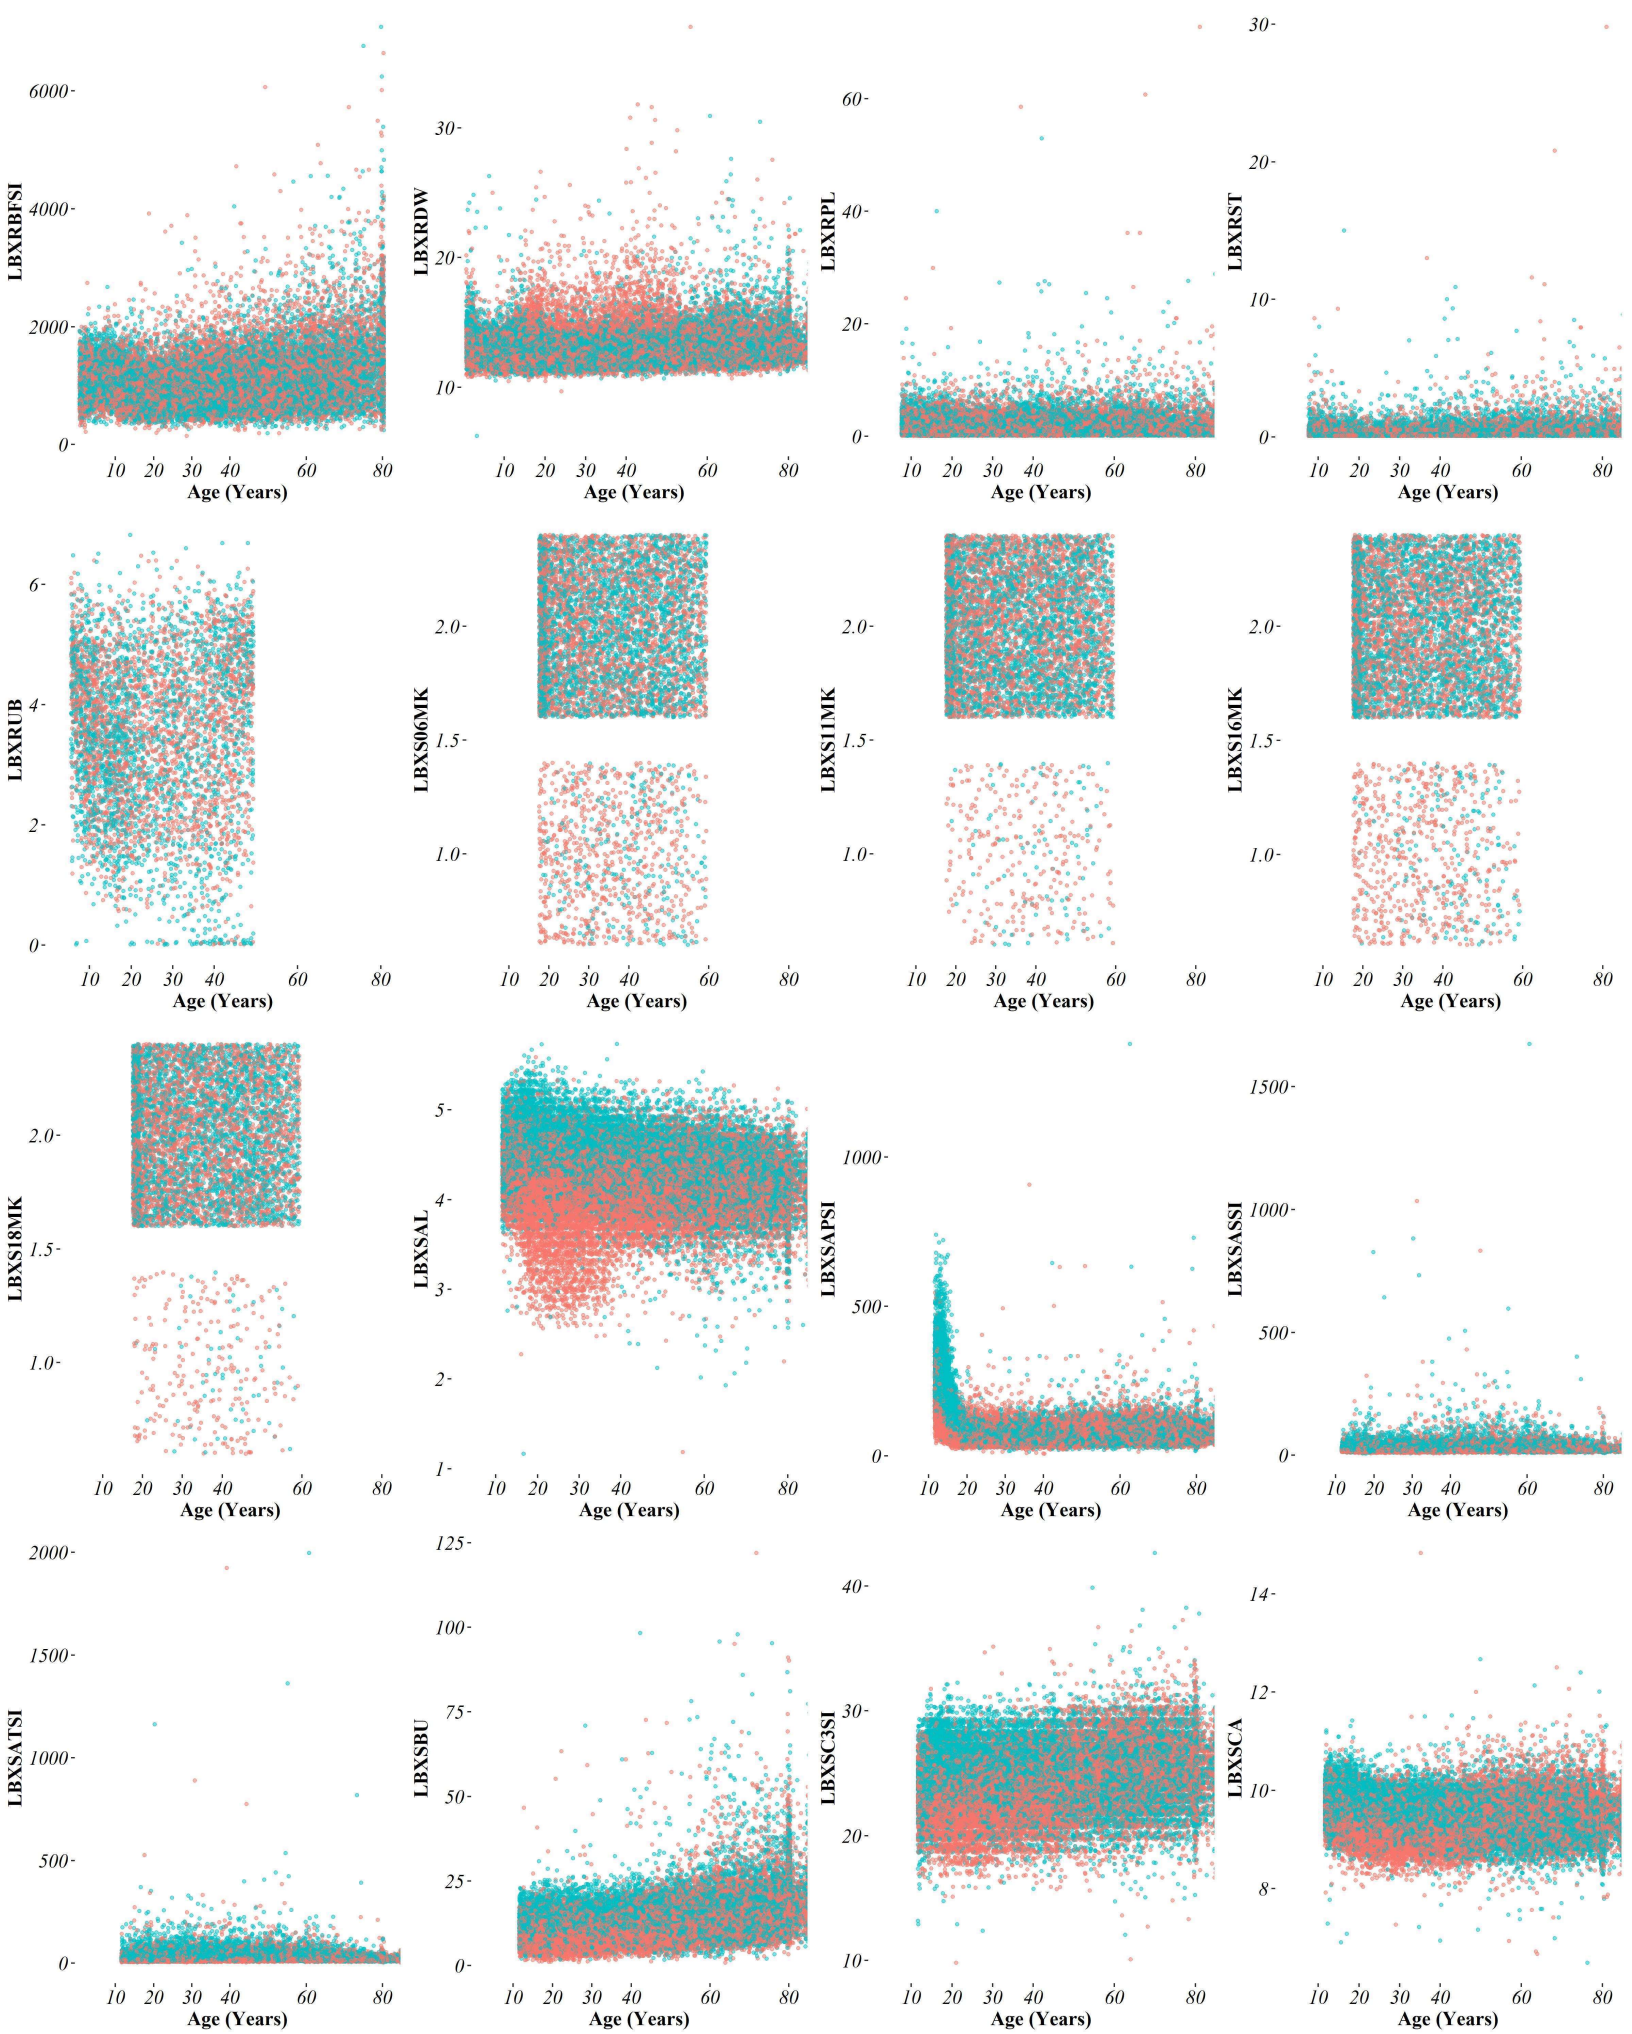

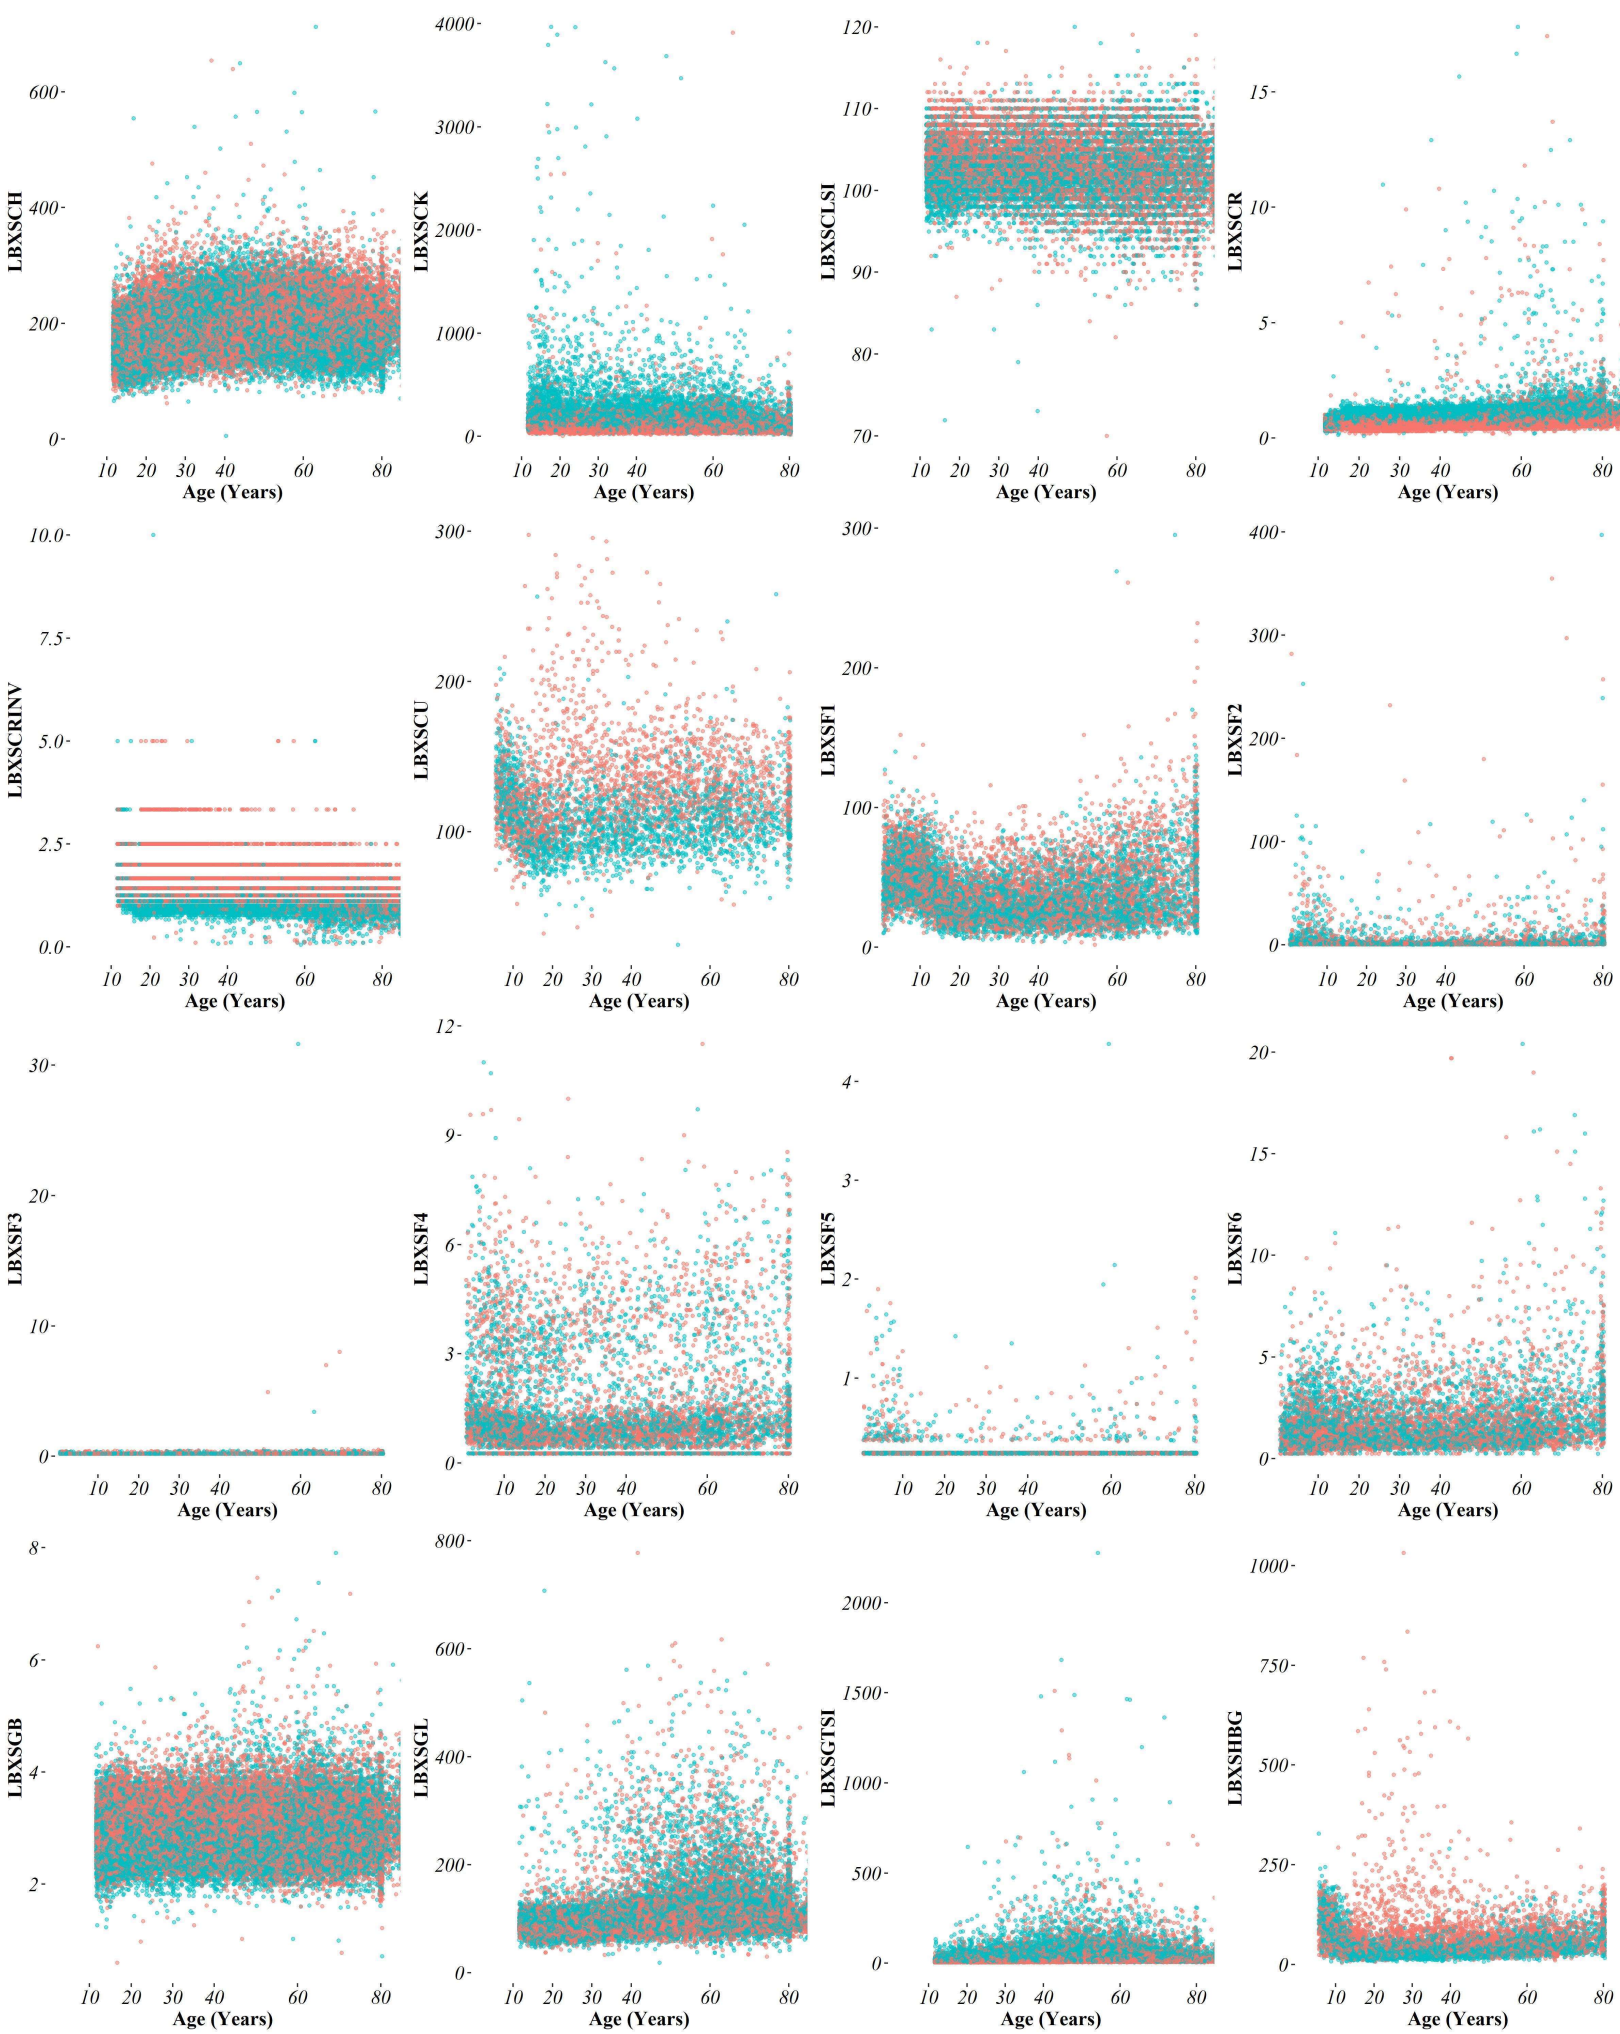



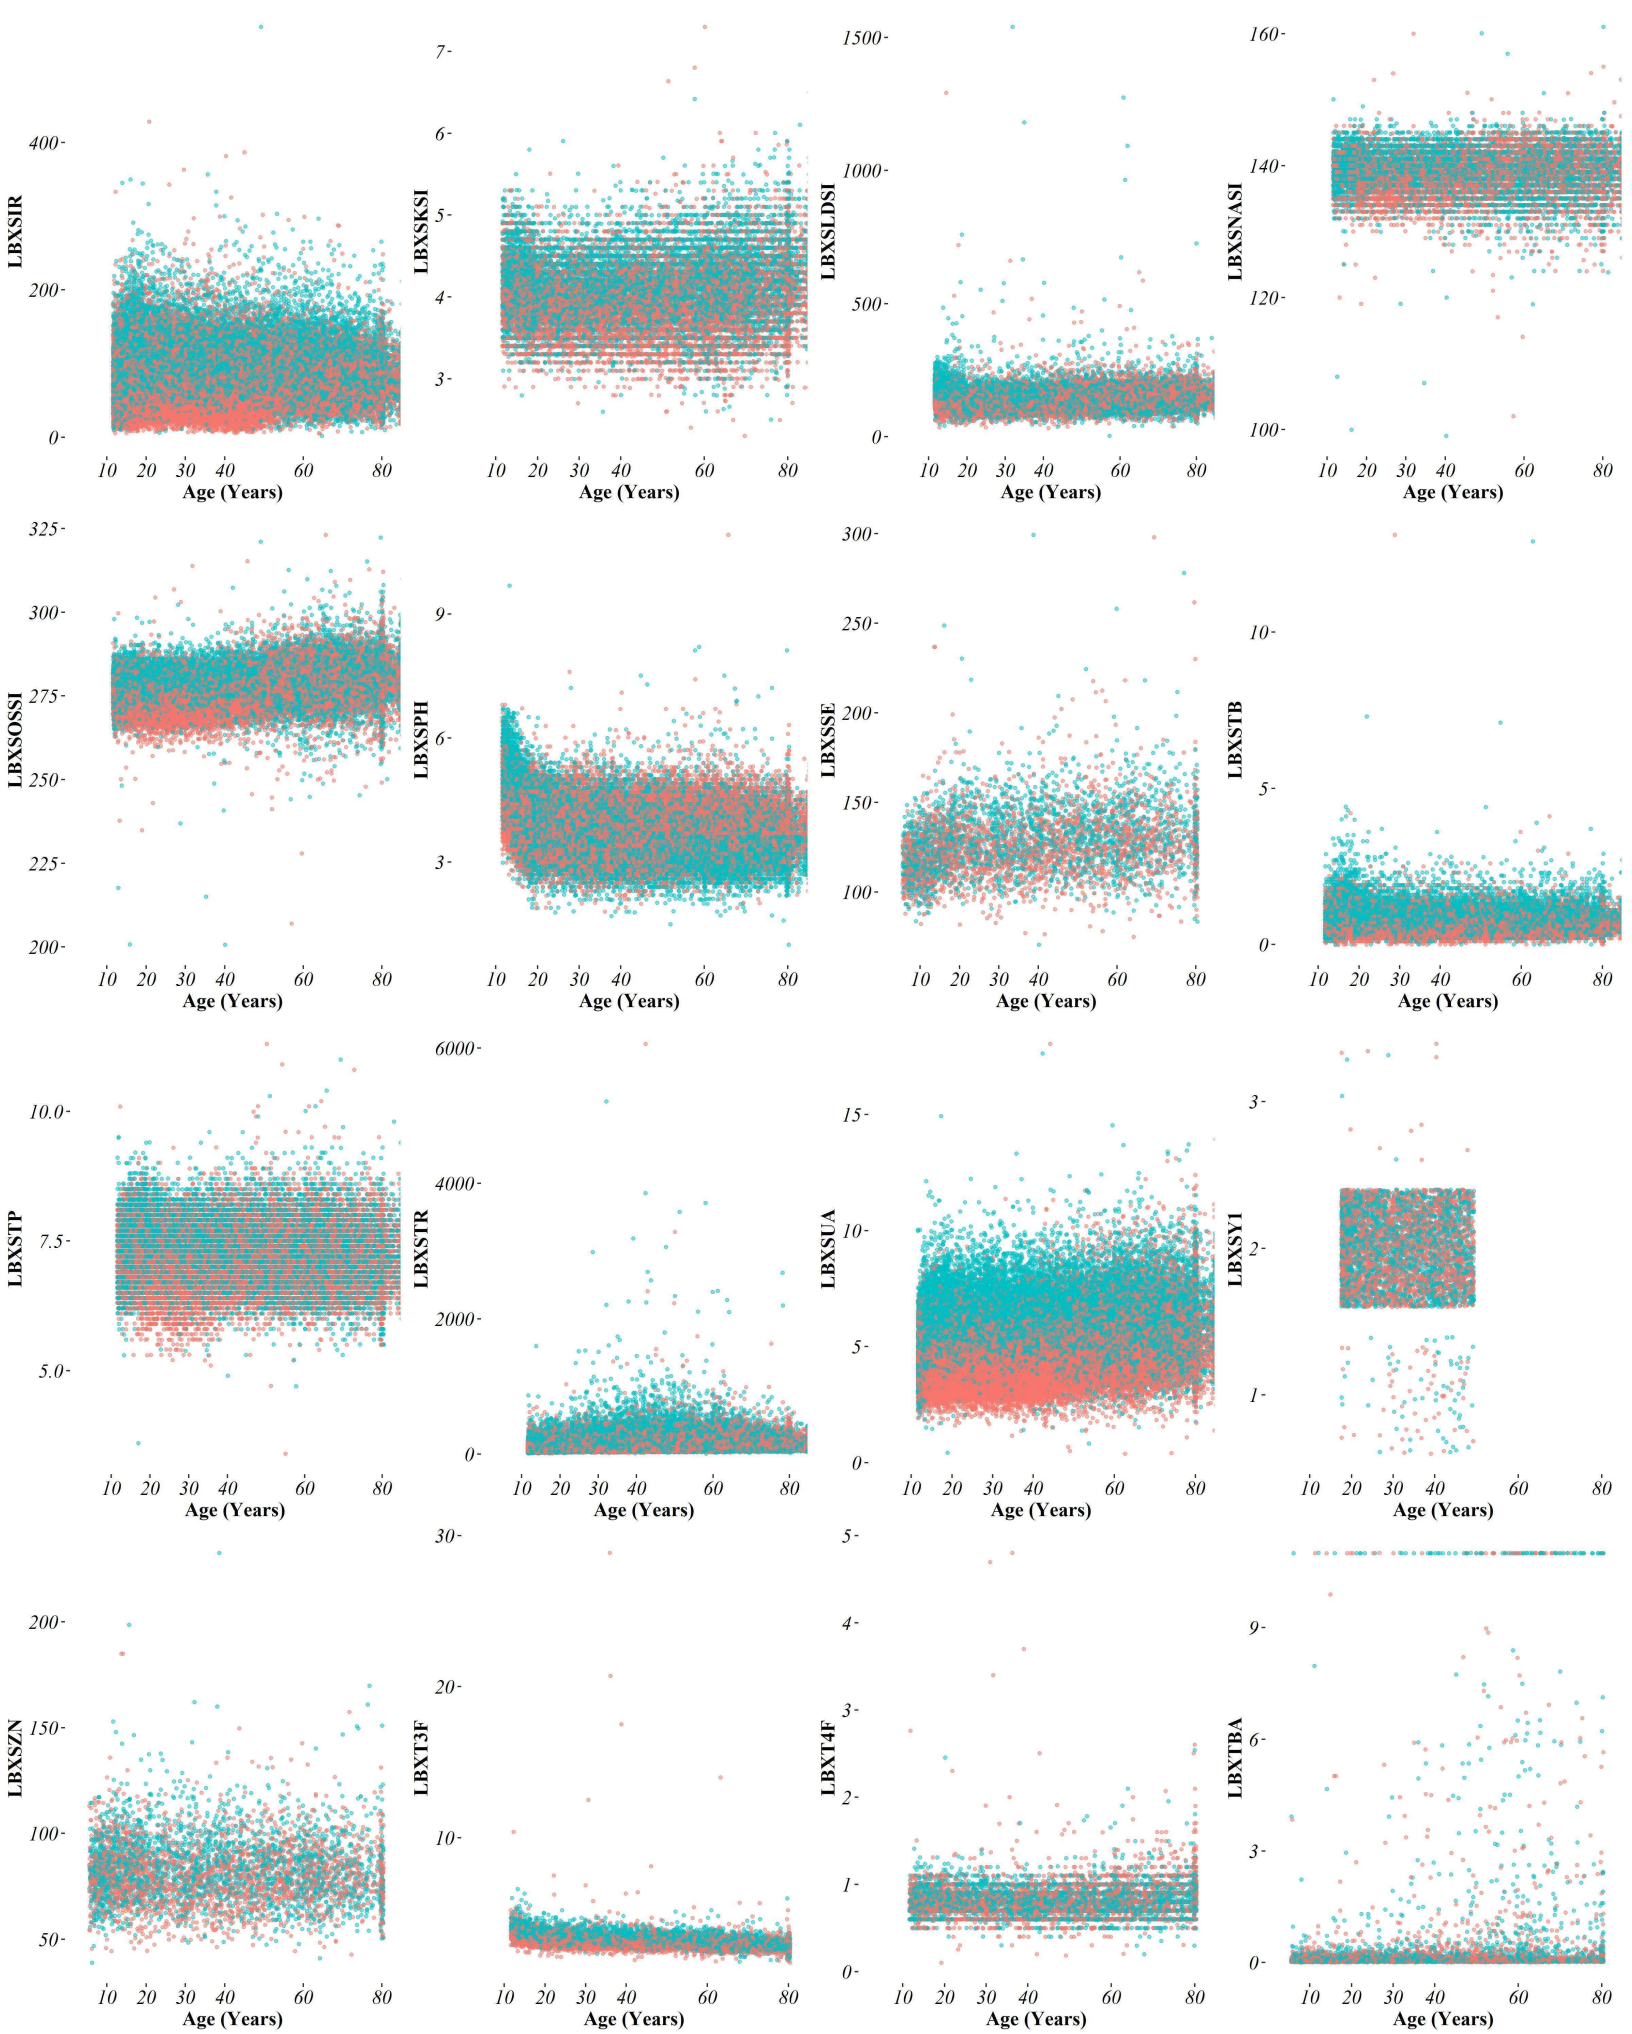

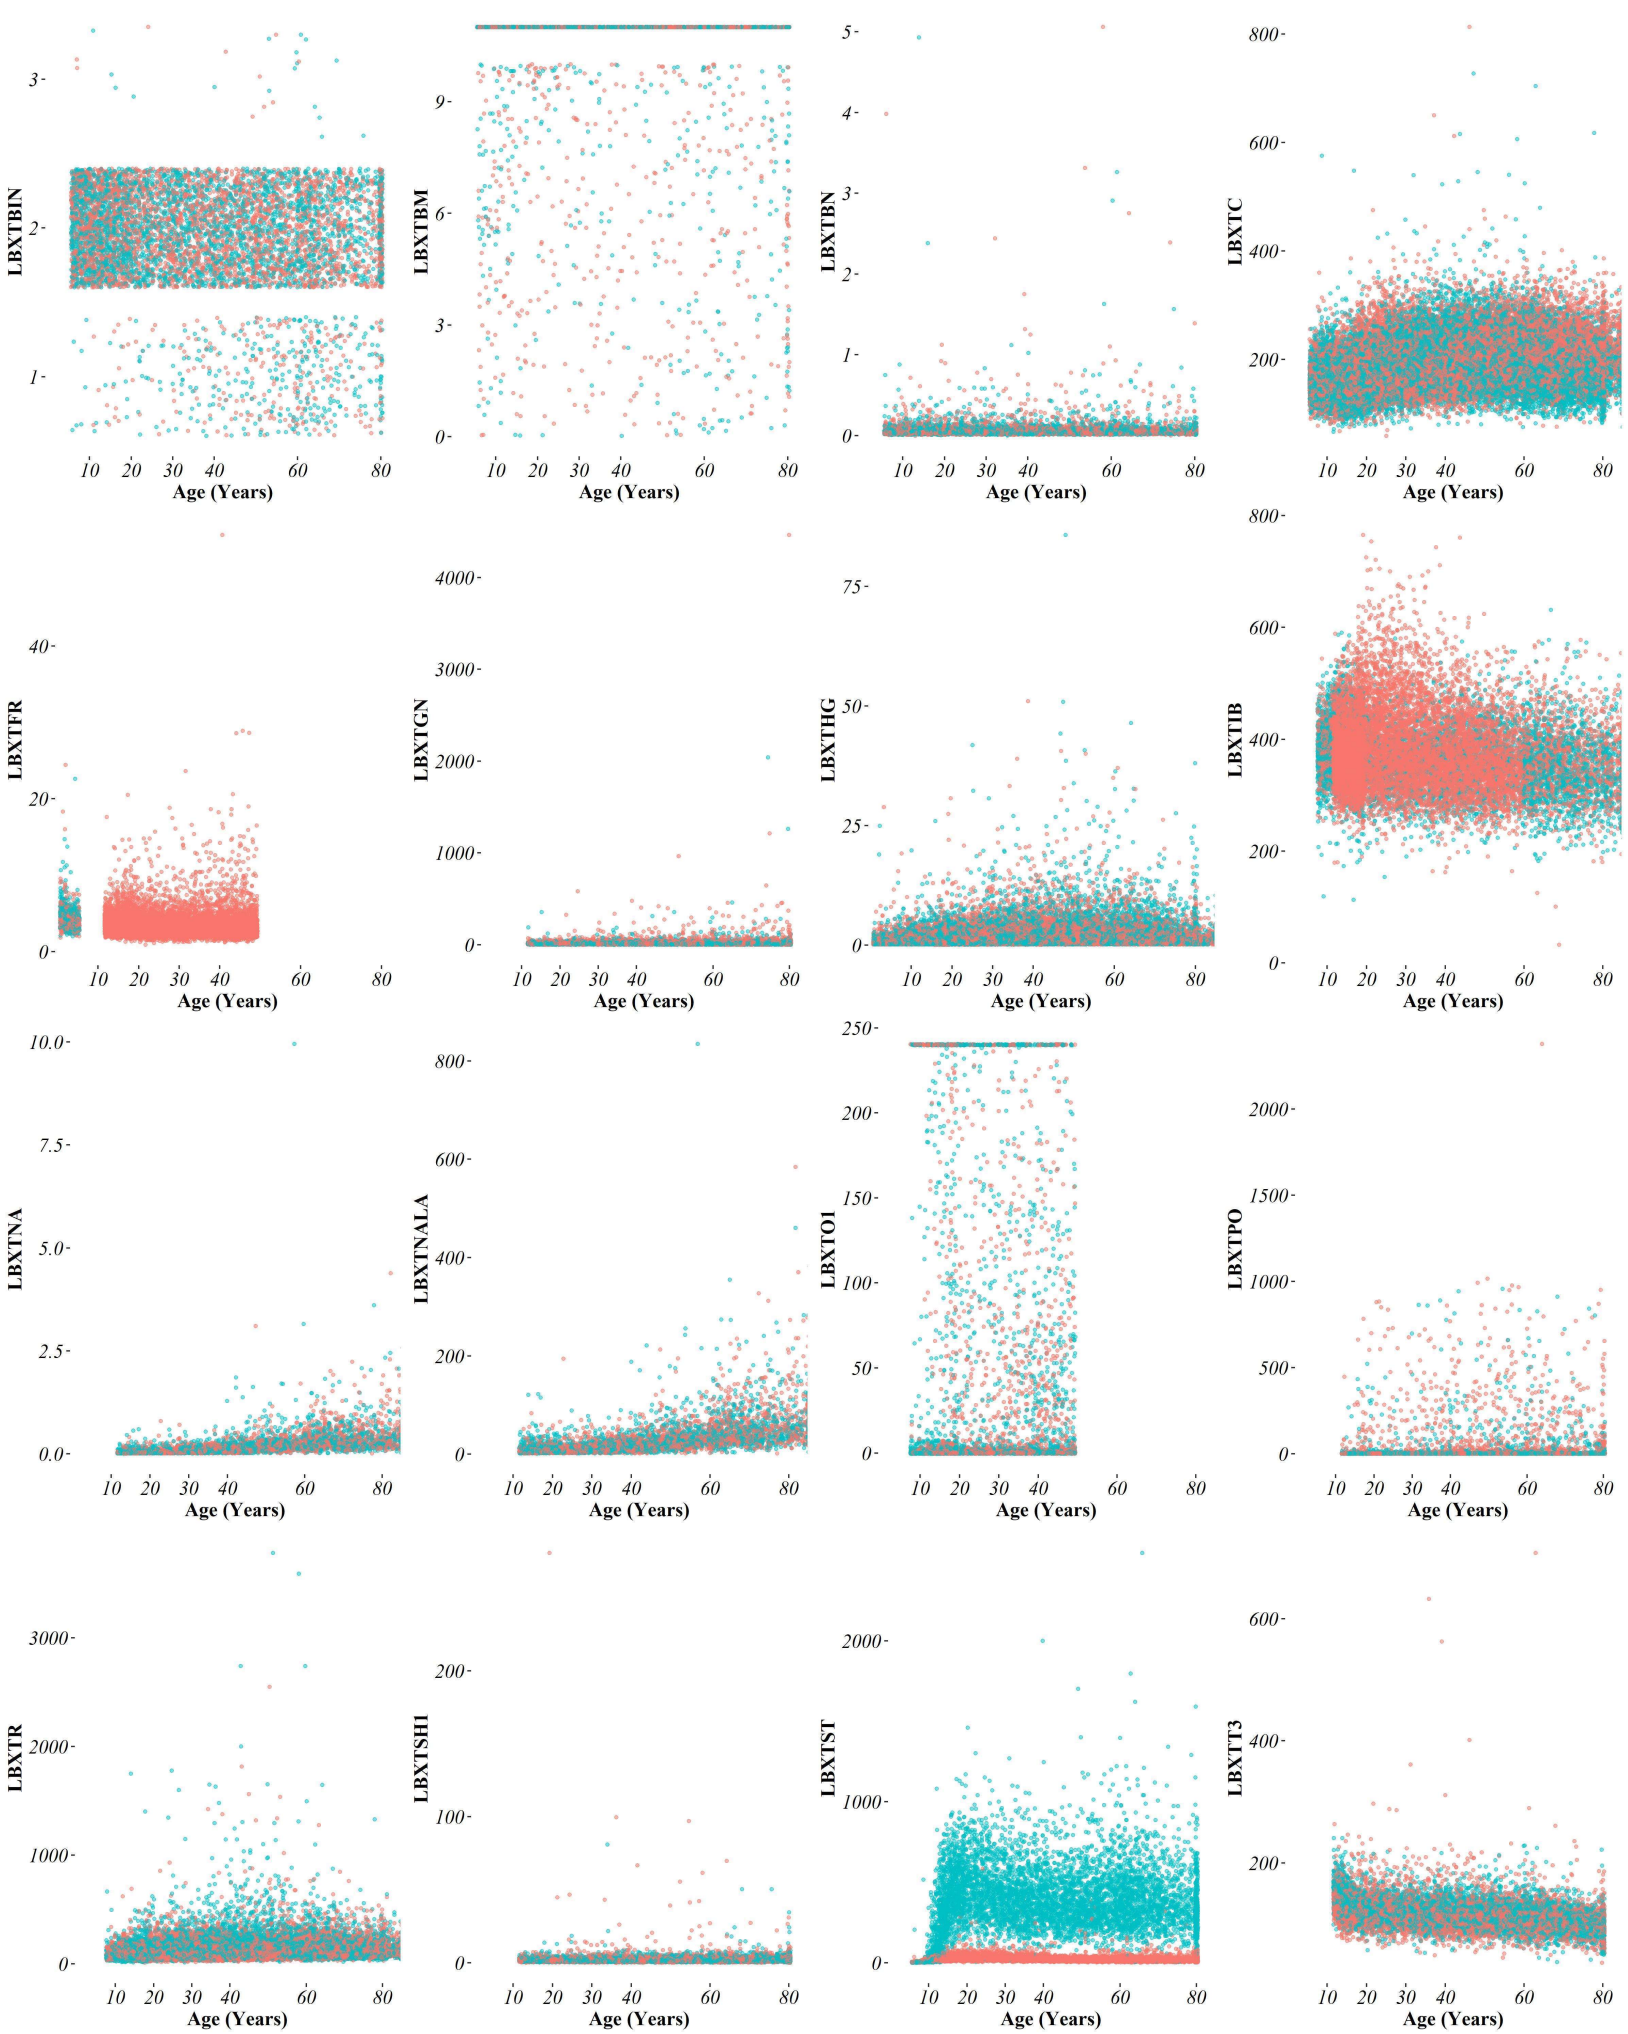



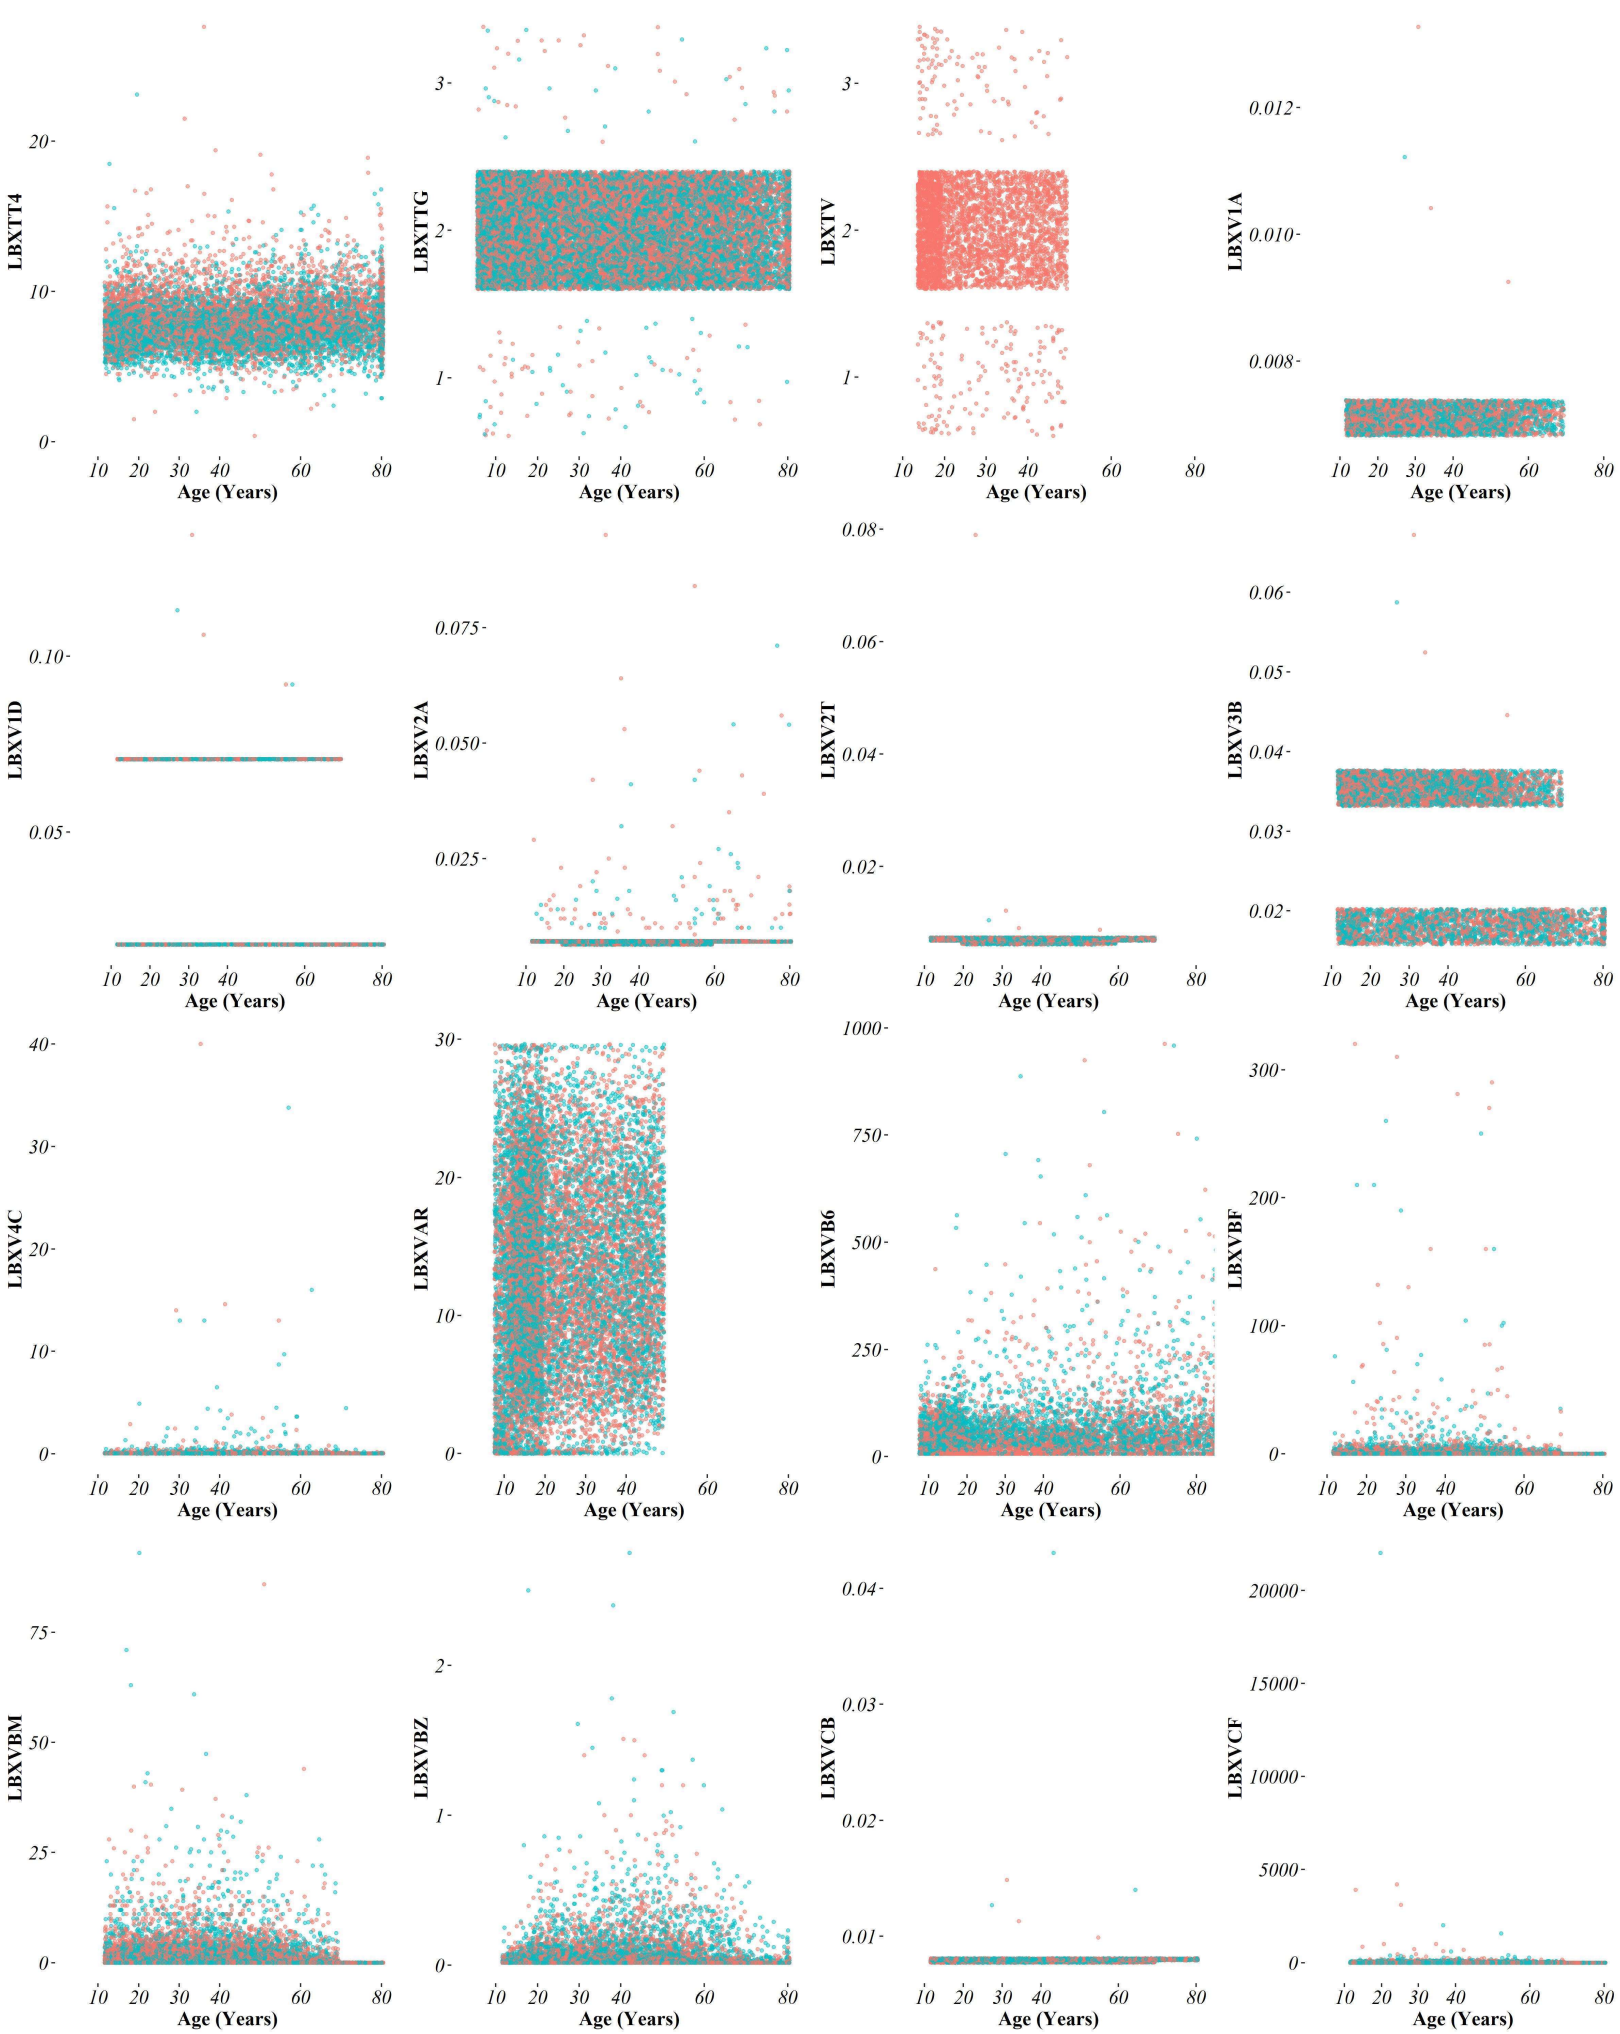

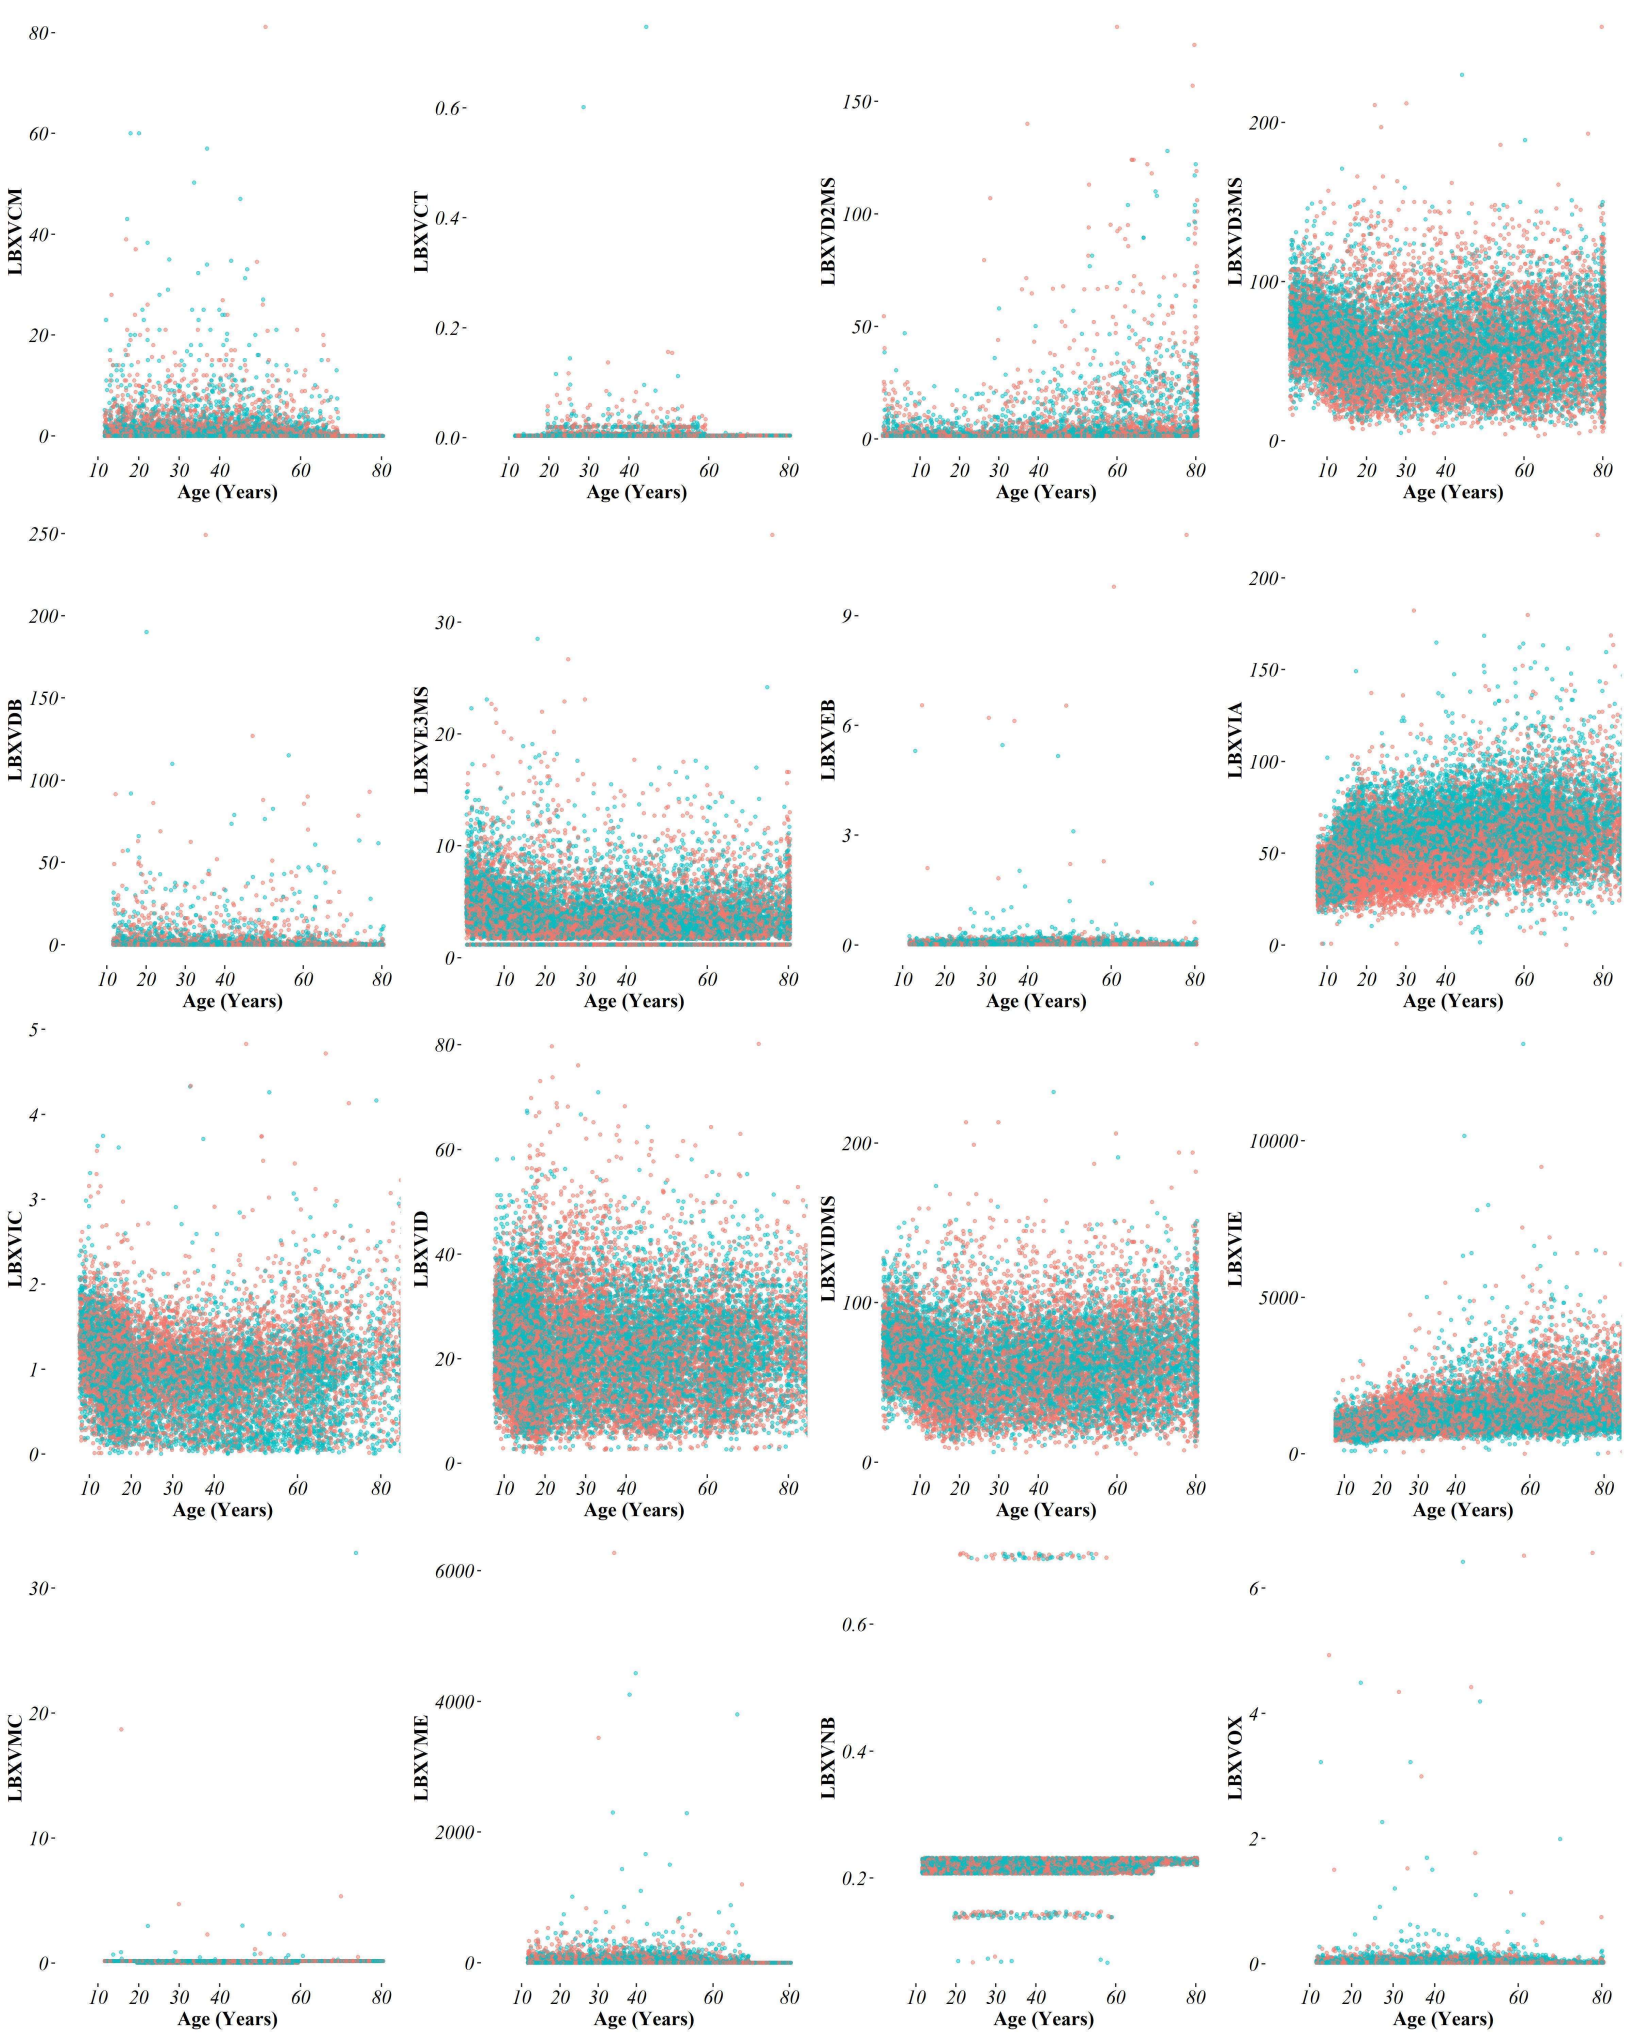



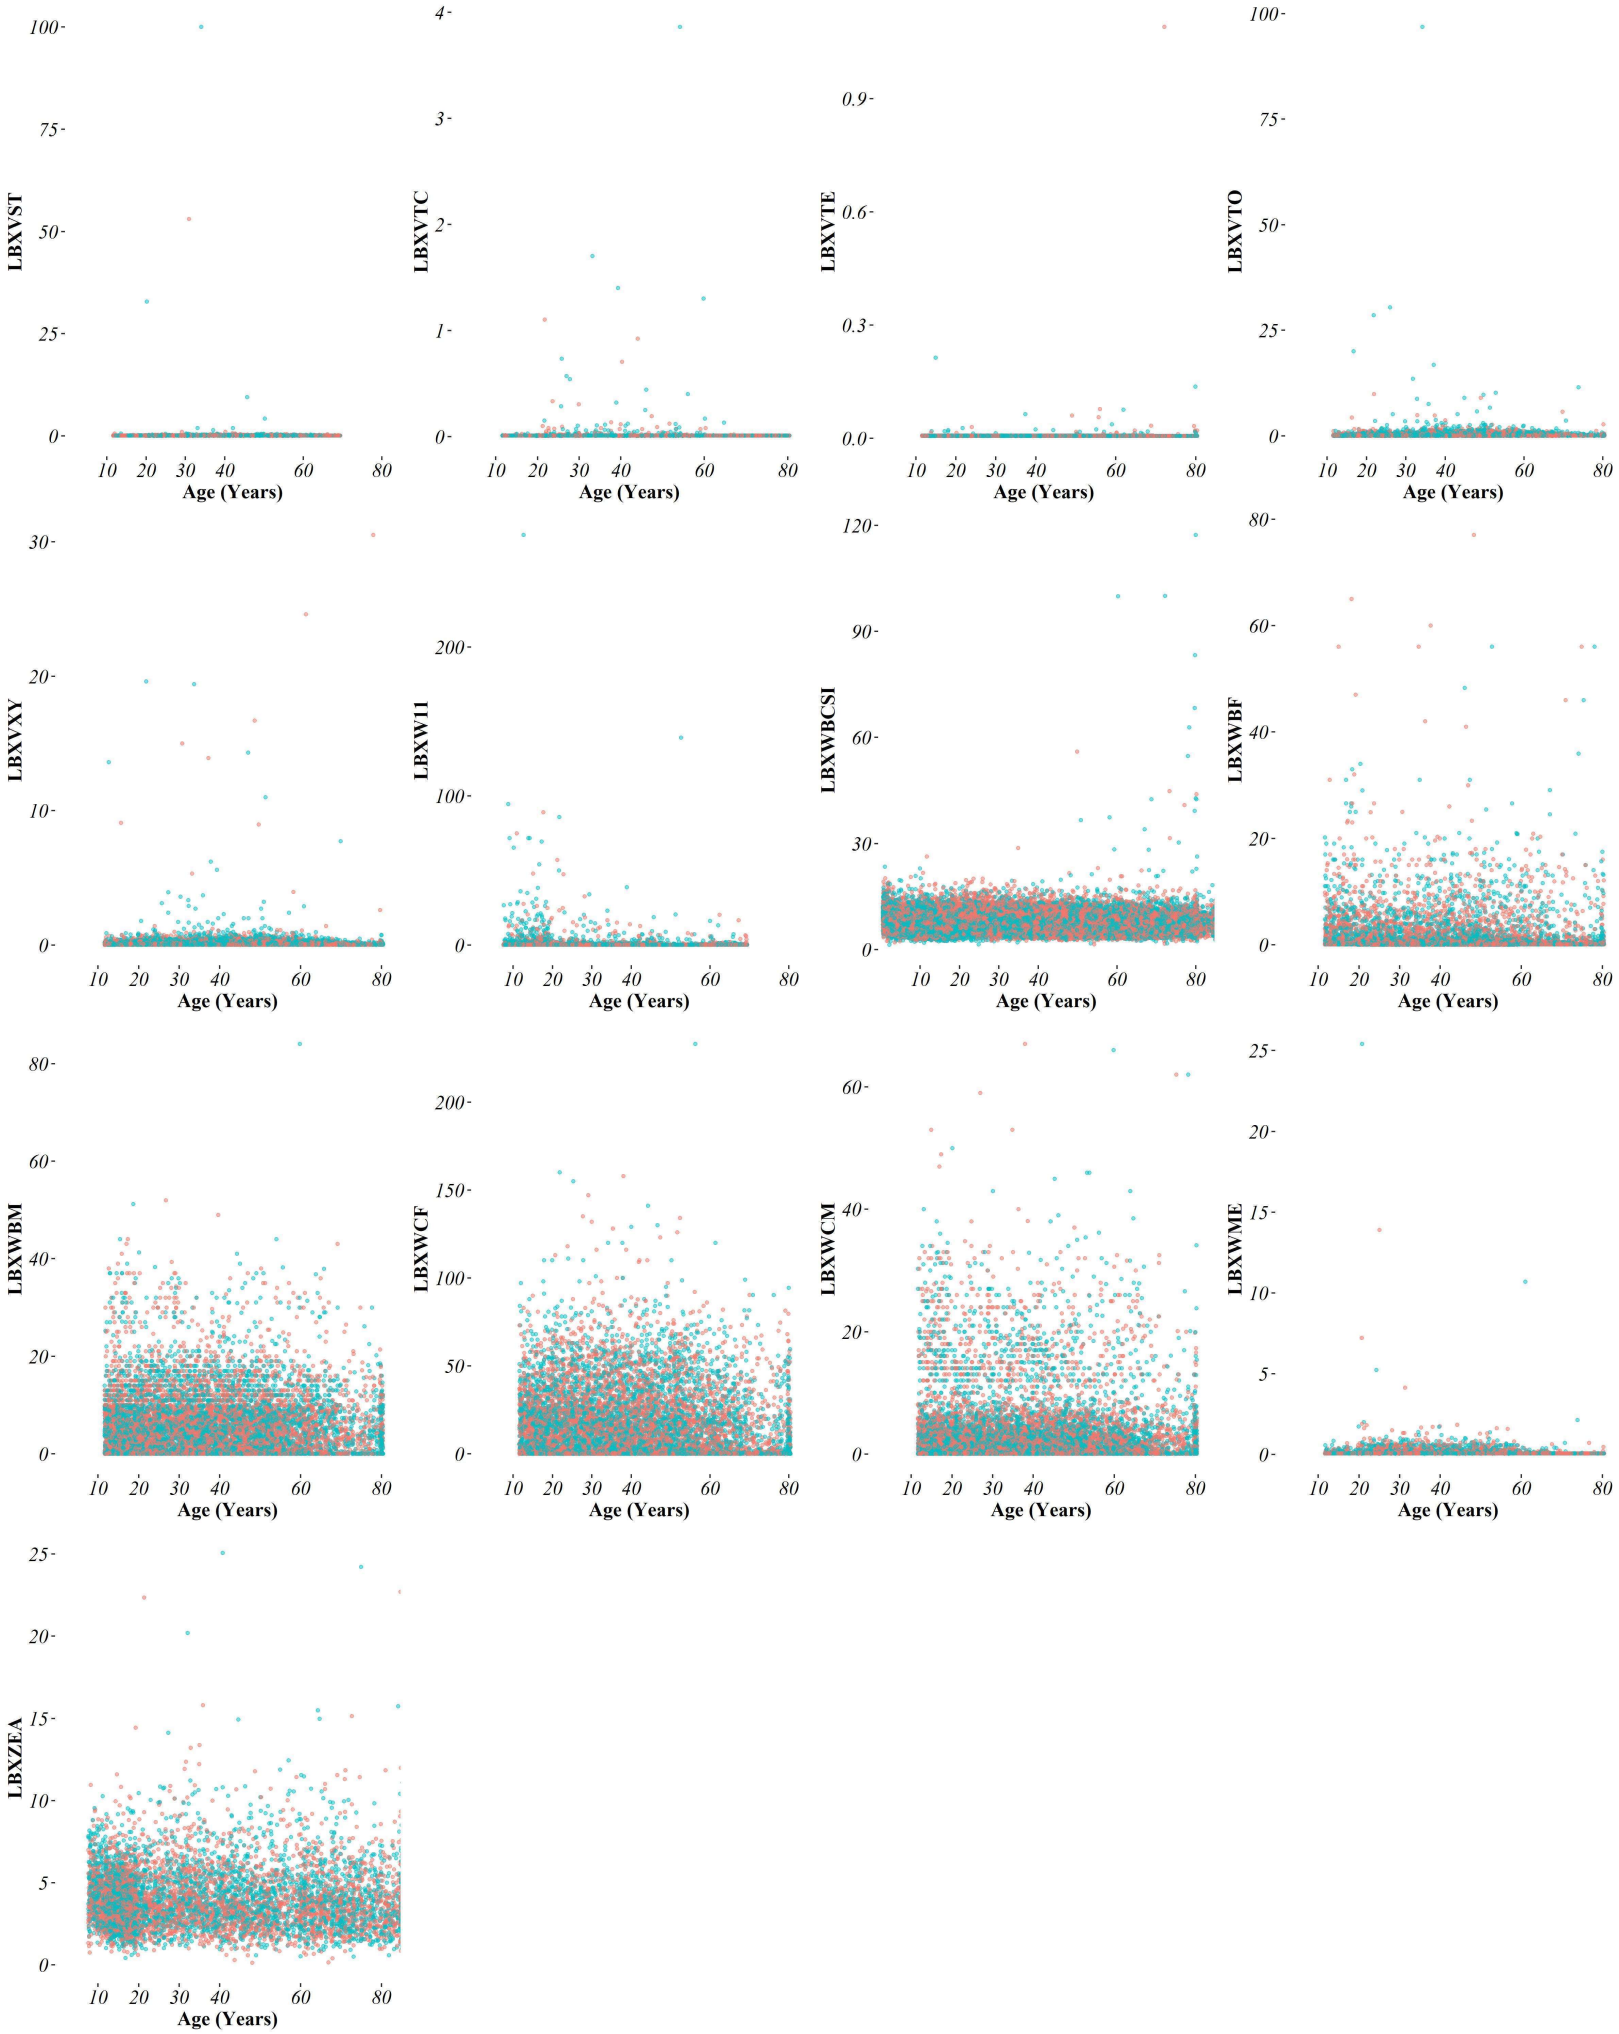

Supplement: aging-12-102900-s004..pdf [file aging-12-102900-s004..pdf]
