# Supplementary material for: Prediction of chronological and biological age from laboratory data
Source: PubMed Central journal article supplement (PMC7244024; doi:10.18632/aging.102900), 2020-05-05
Supplement: aging-12-102900-s001..pdf [file aging-12-102900-s001..pdf]

**Supplementary Table 1. Cumulative relative importance scores for the Top-5 and Top-10 laboratory analytes for predicting age by age group.**

| <b>Group</b>    | <b>Relative Importance</b> |
|-----------------|----------------------------|
| [Top-10[1,18)]  | 0.751                      |
| [Top-10[18,45)] | 0.294                      |
| [Top-10[45,65)] | 0.542                      |
| [Top-1065+]     | 0.225                      |
| [Top-5[1,18)]   | 0.567                      |
| [Top-5[18,45)]  | 0.169                      |
| [Top-5[45,65)]  | 0.464                      |
| [Top-565+]      | 0.144                      |
