# Supplementary material for: Prediction of chronological and biological age from laboratory data
Source: PubMed Central journal article supplement (PMC7244024; doi:10.18632/aging.102900), 2020-05-05
Supplement: aging-12-102900-s002..pdf [file aging-12-102900-s002..pdf]

Supplementary Table 3

Number of missing values for each variable

| <b>Laboratory Variable</b> | <b>Number Missing</b> |
|----------------------------|-----------------------|
| LBXV2P                     | 63747                 |
| LBXLA                      | 63601                 |
| LBXLACL                    | 63601                 |
| LBXEND                     | 63514                 |
| LBXENDLA                   | 63514                 |
| LBX195                     | 63479                 |
| LBX195LA                   | 63479                 |
| LBX206                     | 63455                 |
| LBX206LA                   | 63455                 |
| LBXVDP                     | 63442                 |
| LBXV2C                     | 63427                 |
| LBXVDM                     | 63418                 |
| LBXDIE                     | 63415                 |
| LBXDIELA                   | 63415                 |
| LBX194                     | 63414                 |
| LBX194LA                   | 63414                 |
| LBX189                     | 63413                 |
| LBX189LA                   | 63413                 |
| LBXVHE                     | 63411                 |
| LBXV1E                     | 63400                 |
| LBXTSH                     | 63386                 |
| LBXT4                      | 63382                 |
| LBXV1A                     | 63375                 |
| LBXV2T                     | 63375                 |
| LBX151                     | 63351                 |
| LBX151LA                   | 63351                 |
| LBX196                     | 63351                 |
| LBX196LA                   | 63351                 |
| LBX110                     | 63348                 |
| LBX110LA                   | 63348                 |
| LBX149                     | 63348                 |
| LBX149LA                   | 63348                 |
| LBX087                     | 63338                 |
| LBX087LA                   | 63338                 |
| LBXALD                     | 63305                 |
| LBXALDLA                   | 63305                 |
| LBXM1                      | 63166                 |
| LBXF08                     | 62952                 |
| LBXF08LA                   | 62952                 |
| LBXF10                     | 62819                 |
| LBXF10LA                   | 62819                 |

|           |       |
|-----------|-------|
| LBXD07    | 62817 |
| LBXD07LA  | 62817 |
| LBXTC2    | 62798 |
| LBXTC2LA  | 62798 |
| LBXF06    | 62792 |
| LBXF06LA  | 62792 |
| LBXF04    | 62776 |
| LBXF04LA  | 62776 |
| LBXF07    | 62776 |
| LBXF07LA  | 62776 |
| LBXPCB    | 62776 |
| LBXPCBLA  | 62776 |
| LBXHXC    | 62775 |
| LBXHXCCLA | 62775 |
| LBXD04    | 62774 |
| LBXD04LA  | 62774 |
| LBXD05    | 62770 |
| LBXD05LA  | 62770 |
| LBXD03    | 62761 |
| LBXD03LA  | 62761 |
| LBXF01    | 62761 |
| LBXF01LA  | 62761 |
| LBXF03    | 62761 |
| LBXF03LA  | 62761 |
| LBXF05    | 62754 |
| LBXF05LA  | 62754 |
| LBXTCD    | 62754 |
| LBXTCDLA  | 62754 |
| LBXDWS    | 62743 |
| LBXDWT    | 62739 |
| LBXF02    | 62735 |
| LBXF02LA  | 62735 |
| LBXD01    | 62727 |
| LBXD01LA  | 62727 |
| LBXSSE    | 62710 |
| LBXSZN    | 62710 |
| LBXSCU    | 62709 |
| LBXMEA    | 62494 |
| LBXMUM    | 62494 |
| LBXRUB    | 62494 |
| LBX052    | 62413 |
| LBX052LA  | 62413 |
| LBXVST    | 62359 |
| LBXH2RL   | 62166 |

|          |       |
|----------|-------|
| LBXHPE   | 61935 |
| LBXHPELA | 61935 |
| LBXOXY   | 61868 |
| LBXOXYLA | 61868 |
| LBXODT   | 61864 |
| LBXODTLA | 61864 |
| LBXPDT   | 61813 |
| LBXPDTLA | 61813 |
| LBXFB    | 61786 |
| LBXHCB   | 61786 |
| LBXHCBLA | 61786 |
| LBX172   | 61776 |
| LBX172LA | 61776 |
| LBXSY1   | 61775 |
| LBX170   | 61768 |
| LBX170LA | 61768 |
| LBXVTE   | 61754 |
| LBXHP1   | 61750 |
| LBXPCT   | 61748 |
| LBXGHC   | 61717 |
| LBXGHCLA | 61717 |
| LBX177   | 61712 |
| LBX177LA | 61712 |
| LBX157   | 61704 |
| LBX157LA | 61704 |
| LBXMIR   | 61698 |
| LBXMIRLA | 61698 |
| LBX099   | 61696 |
| LBX099LA | 61696 |
| LBX167   | 61687 |
| LBX167LA | 61687 |
| LBX066   | 61682 |
| LBX066LA | 61682 |
| LBX156   | 61673 |
| LBX156LA | 61673 |
| LBX128   | 61657 |
| LBX128LA | 61657 |
| LBX105   | 61655 |
| LBX105LA | 61655 |
| LBX146   | 61643 |
| LBX146LA | 61643 |
| LBX178   | 61642 |
| LBX178LA | 61642 |
| LBX138   | 61640 |

|          |       |
|----------|-------|
| LBX138LA | 61640 |
| LBX183   | 61639 |
| LBX183LA | 61639 |
| LBX118   | 61637 |
| LBX118LA | 61637 |
| LBX180   | 61636 |
| LBX180LA | 61636 |
| LBX187   | 61633 |
| LBX187LA | 61633 |
| LBX074   | 61631 |
| LBX074LA | 61631 |
| LBX153   | 61631 |
| LBX153LA | 61631 |
| LBX101   | 61627 |
| LBX101LA | 61627 |
| LBXBHC   | 61611 |
| LBXBHCLA | 61611 |
| LBXTNA   | 61580 |
| LBXTNALA | 61580 |
| LBXPDE   | 61547 |
| LBXPDELA | 61547 |
| LBXIF2   | 61300 |
| LBXE74   | 61268 |
| LBXE72   | 61248 |
| LBXW11   | 61236 |
| LBXF24   | 61233 |
| LBXIM3   | 61233 |
| LBXIF1   | 61231 |
| LBXF13   | 61230 |
| LBXIT3   | 61229 |
| LBXIT7   | 61228 |
| LBXIM6   | 61226 |
| LBXIW1   | 61226 |
| LBXIG5   | 61226 |
| LBXIG2   | 61226 |
| LBXII6   | 61220 |
| LBXIGE   | 61216 |
| LBXID2   | 61215 |
| LBXIE5   | 61215 |
| LBXID1   | 61214 |
| LBXIE1   | 61214 |
| LBXACR   | 61025 |
| LBXGLY   | 60918 |
| LBXVMC   | 60835 |

|          |       |
|----------|-------|
| LBXS06MK | 60737 |
| LBXS11MK | 60737 |
| LBXS16MK | 60737 |
| LBXS18MK | 60737 |
| LBXVNB   | 60624 |
| LBXSHBG  | 60604 |
| LBXVB6   | 60552 |
| LBXATC   | 60516 |
| LBXACY   | 60516 |
| LBXBCC   | 60516 |
| LBXCLC   | 60516 |
| LBXCLZ   | 60516 |
| LBXDTC   | 60516 |
| LBXLCC   | 60516 |
| LBXLUT   | 60516 |
| LBXPHF   | 60516 |
| LBXPHE   | 60516 |
| LBXZEA   | 60516 |
| LBXV1D   | 60488 |
| LBXP1    | 60483 |
| LBXP2    | 60483 |
| LBX2DF   | 60468 |
| LBXV2A   | 60450 |
| LBXHDD   | 60439 |
| LBXTBIN  | 60420 |
| LBXTBM   | 60419 |
| LBXVCB   | 60416 |
| LBXTBA   | 60416 |
| LBXTBN   | 60415 |
| LBXEST   | 60413 |
| LBXV3B   | 60407 |
| LBXSF4   | 60061 |
| LBXSF3   | 60056 |
| LBXSF5   | 60056 |
| LBXSF6   | 60053 |
| LBXHCR   | 60019 |
| LBX06    | 59880 |
| LBX11    | 59880 |
| LBX16    | 59880 |
| LBX18    | 59880 |
| LBXVME   | 59688 |
| LBXVCF   | 59569 |
| LBXVBF   | 59402 |
| LBXVCT   | 59251 |

|         |       |
|---------|-------|
| LBXVDB  | 59237 |
| LBXVBM  | 59221 |
| LBXVCM  | 59213 |
| LBXVBZ  | 59212 |
| LBXVEB  | 59187 |
| LBXV4C  | 59097 |
| LBXVTC  | 59059 |
| LBXVTO  | 59028 |
| LBXWME  | 59008 |
| LBXVXY  | 58974 |
| LBXWCF  | 58971 |
| LBXWBM  | 58921 |
| LBXWBF  | 58920 |
| LBXVOX  | 58912 |
| LBXWCM  | 58900 |
| LBXCPSI | 58345 |
| LBXTFR  | 57662 |
| LBXSF2  | 57349 |
| LBXSF1  | 57330 |
| LBXPFBS | 57324 |
| LBXTPO  | 57007 |
| LBXATG  | 56981 |
| LBXTT4  | 56962 |
| LBXT3F  | 56927 |
| LBXTGN  | 56923 |
| LBXTT3  | 56920 |
| LBXT4F  | 56915 |
| LBXTSH1 | 56915 |
| LBXEPAH | 55924 |
| LBXPFHP | 55924 |
| LBXPFOA | 55924 |
| LBXPFOS | 55924 |
| LBXPFSA | 55924 |
| LBXAPB  | 55334 |
| LBXVIC  | 54232 |
| LBXPT21 | 54131 |
| LBXGLT  | 53957 |
| LBXMPAH | 53931 |
| LBXPFDE | 53931 |
| LBXPFDO | 53931 |
| LBXPFHS | 53931 |
| LBXPFNA | 53931 |
| LBXPFUA | 53931 |
| LBXTST  | 53494 |

|           |       |
|-----------|-------|
| LBXTO1    | 53475 |
| LBXME     | 53403 |
| LBXVAR    | 53403 |
| LBXMS1    | 52709 |
| LBXVE3MS  | 52034 |
| LBXVIDMS  | 51856 |
| LBXVD2MS  | 51855 |
| LBXVD3MS  | 51855 |
| LBXBGE    | 51124 |
| LBXBGM    | 51122 |
| LBXBSE    | 50995 |
| LBXBMN    | 50995 |
| LBXEPP    | 49337 |
| LBXBAP    | 49238 |
| LBXTIB    | 48966 |
| LBXIRN    | 48904 |
| LBXSCK    | 48772 |
| LBXCBC    | 47149 |
| LBXMMA    | 47045 |
| LBXCRY    | 46691 |
| LBXALC    | 46609 |
| LBXLYC    | 46608 |
| LBXLUZ    | 46607 |
| LBXBEC    | 46600 |
| LBXVID    | 46485 |
| LBXTTG    | 45929 |
| LBXTR     | 45441 |
| LBX4PA    | 44553 |
| LBXPLP    | 44552 |
| LBXFER    | 44067 |
| LBXRST    | 43867 |
| LBXIN     | 43375 |
| LBXFOLSI  | 43101 |
| LBXHCY    | 43023 |
| LBXSCRINV | 42926 |
| LBXRBSI   | 42586 |
| LBXRPL    | 42564 |
| LBXGTC    | 41678 |
| LBXHE2    | 41512 |
| LBXVIE    | 40849 |
| LBXVIA    | 40806 |
| LBXFOL    | 40592 |
| LBXRBF    | 40395 |
| LBXGLU    | 39766 |

|          |       |
|----------|-------|
| LBXB12   | 35759 |
| LBXHE1   | 34989 |
| LBXCRP   | 25370 |
| LBXTHG   | 25161 |
| LBXCOT   | 17327 |
| LBXIHG   | 17298 |
| LBXMC    | 15143 |
| LBXSLDSI | 10903 |
| LBXSASSI | 10901 |
| LBXSATSI | 10896 |
| LBXSC3SI | 10884 |
| LBXSGB   | 10883 |
| LBXSTP   | 10882 |
| LBXSIR   | 10876 |
| LBXSCA   | 10867 |
| LBXSTB   | 10853 |
| LBXSTR   | 10849 |
| LBXSUA   | 10834 |
| LBXSCLSI | 10833 |
| LBXSGTSI | 10830 |
| LBXSPH   | 10830 |
| LBXSKSI  | 10830 |
| LBXSAPSI | 10829 |
| LBXSCH   | 10829 |
| LBXSOSSI | 10829 |
| LBXSBU   | 10826 |
| LBXSNASI | 10826 |
| LBXSCR   | 10824 |
| LBXSAL   | 10822 |
| LBXSGL   | 10821 |
| LBXGH    | 10087 |
| LBXHA    | 7464  |
| LBXLYPCT | 7179  |
| LBXMOPCT | 7179  |
| LBXNEPCT | 7179  |
| LBXEOPCT | 7179  |
| LBXBAPCT | 7179  |
| LBXWBCSI | 7031  |
| LBXPLTSI | 7030  |
| LBXMPSI  | 7030  |
| LBXRBCSI | 7029  |
| LBXHGB   | 7029  |
| LBXHCT   | 7029  |
| LBXMCVSI | 7029  |



|          |      |
|----------|------|
| LBXMCHSI | 7029 |
| LBXRDW   | 7029 |
| LBXBPB   | 6594 |
| LBXBCD   | 6594 |
| LBXTC    | 4240 |
| LBXHBC   | 4083 |
| LBXHBS   | 1887 |
