# Supplementary material for: Prediction of chronological and biological age from laboratory data
Source: PubMed Central journal article supplement (PMC7244024; doi:10.18632/aging.102900), 2020-05-05
Supplement: aging-12-102900-s003..pdf [file aging-12-102900-s003..pdf]

Supplementary Table 2: List of 356 Laboratory Variables

Full variable names and additional information can be found here:

<https://wwwn.cdc.gov/nchs/nhanes/Search/default.aspx>

|             |              |             |             |
|-------------|--------------|-------------|-------------|
| 'LBXWBCSI', | 'LBXSCRINV', | 'LBXVBF',   | 'LBX157LA', |
| 'LBXLYPCT', | 'LBXTO1',    | 'LBXVBM',   | 'LBX167',   |
| 'LBXMOPCT', | 'LBXTR',     | 'LBXVBZ',   | 'LBX167LA', |
| 'LBXNEPCT', | 'LBXTC',     | 'LBXVCF',   | 'LBX170',   |
| 'LBXEOPCT', | 'LBXCRP',    | 'LBXVCM',   | 'LBX170LA', |
| 'LBXBAPCT', | 'LBXHP1',    | 'LBXVCT',   | 'LBX172',   |
| 'LBXRBCSI', | 'LBXFB',     | 'LBXVDB',   | 'LBX172LA', |
| 'LBXHGB',   | 'LBXBAP',    | 'LBXVEB',   | 'LBX177',   |
| 'LBXHCT',   | 'LBXGLU',    | 'LBXVME',   | 'LBX177LA', |
| 'LBXMCVSI', | 'LBXCPSI',   | 'LBXVOX',   | 'LBX178',   |
| 'LBXMCHSI', | 'LBXIN',     | 'LBXVST',   | 'LBX178LA', |
| 'LBXMC',    | 'LBXGH',     | 'LBXVTC',   | 'LBX180',   |
| 'LBXRDW',   | 'LBXHE1',    | 'LBXVTO',   | 'LBX180LA', |
| 'LBXPLTSI', | 'LBXHE2',    | 'LBXVXY',   | 'LBX183',   |
| 'LBXMPSI',  | 'LBXLA',     | 'LBXHA',    | 'LBX183LA', |
| 'LBXME',    | 'LBXLACL',   | 'LBXHBC',   | 'LBX187',   |
| 'LBXVAR',   | 'LBXBPB',    | 'LBXHBS',   | 'LBX187LA', |
| 'LBXT4',    | 'LBXBCD',    | 'LBX052',   | 'LBXD01',   |
| 'LBXTSH',   | 'LBXEPP',    | 'LBX052LA', | 'LBXD01LA', |
| 'LBXSAL',   | 'LBXIRN',    | 'LBX066',   | 'LBXD03',   |
| 'LBXSATSI', | 'LBXTIB',    | 'LBX066LA', | 'LBXD03LA', |
| 'LBXSASSI', | 'LBXPCT',    | 'LBX074',   | 'LBXD04',   |
| 'LBXSAPSI', | 'LBXFER',    | 'LBX074LA', | 'LBXD04LA', |
| 'LBXSBU',   | 'LBXFOL',    | 'LBX099',   | 'LBXD05',   |
| 'LBXSCA',   | 'LBXB12',    | 'LBX099LA', | 'LBXD05LA', |
| 'LBXSCH',   | 'LBXHCY',    | 'LBX101',   | 'LBXD07',   |
| 'LBXSC3SI', | 'LBXMMA',    | 'LBX101LA', | 'LBXD07LA', |
| 'LBXSGTSI', | 'LBXTHG',    | 'LBX105',   | 'LBXF01',   |
| 'LBXSGL',   | 'LBXIHG',    | 'LBX105LA', | 'LBXF01LA', |
| 'LBXSIR',   | 'LBXRBF',    | 'LBX118',   | 'LBXF02',   |
| 'LBXSLDSI', | 'LBXCOT',    | 'LBX118LA', | 'LBXF02LA', |
| 'LBXSPH',   | 'LBXGTC',    | 'LBX128',   | 'LBXF03',   |
| 'LBXSTB',   | 'LBXRPL',    | 'LBX128LA', | 'LBXF03LA', |
| 'LBXSTP',   | 'LBXRST',    | 'LBX138',   | 'LBXF04',   |
| 'LBXSTR',   | 'LBXVIA',    | 'LBX138LA', | 'LBXF04LA', |
| 'LBXSUA',   | 'LBXVIE',    | 'LBX146',   | 'LBXF05',   |
| 'LBXSCR',   | 'LBXWBF',    | 'LBX146LA', | 'LBXF05LA', |
| 'LBXSNASI', | 'LBXWCF',    | 'LBX153',   | 'LBXF06',   |
| 'LBXSKSI',  | 'LBXWBM',    | 'LBX153LA', | 'LBXF06LA', |
| 'LBXSCLSI', | 'LBXWCM',    | 'LBX156',   | 'LBXF07',   |
| 'LBXSOSSI', | 'LBXWME',    | 'LBX156LA', | 'LBXF07LA', |
| 'LBXSGB',   | 'LBXV4C',    | 'LBX157',   | 'LBXF08',   |

|              |             |             |             |
|--------------|-------------|-------------|-------------|
| 'LBXF08LA',  | 'LBXLUZ',   | 'LBXVIC',   | 'LBX4PA',   |
| 'LBXF10',    | 'LBXLYC',   | 'LBXPT21',  | 'LBXPLP',   |
| 'LBXF10LA',  | 'LBXP1',    | 'LBXHDD',   | 'LBXRBFSS', |
| 'LBXPCB',    | 'LBXP2',    | 'LBXPFBS',  | 'LBXFOLSI', |
| 'LBXPCBLA',  | 'LBX087',   | 'LBXVB6',   | 'LBXHCR',   |
| 'LBXTC2',    | 'LBX087LA', | 'LBXATC',   | 'LBXH2RL',  |
| 'LBXTC2LA',  | 'LBX110',   | 'LBXACY',   | 'LBXATG',   |
| 'LBXTCD',    | 'LBX110LA', | 'LBXBCC',   | 'LBXT3F',   |
| 'LBXTCDLA',  | 'LBX149',   | 'LBXCLC',   | 'LBXT4F',   |
| 'LBXGHC',    | 'LBX149LA', | 'LBXCLZ',   | 'LBXTGN',   |
| 'LBXGHCLA',  | 'LBX151',   | 'LBXDTC',   | 'LBXTSH1',  |
| 'LBXHCB',    | 'LBX151LA', | 'LBXLCC',   | 'LBXTPO',   |
| 'LBXHCBLA',  | 'LBX189',   | 'LBXLUT',   | 'LBXTT3',   |
| 'LBXHPE',    | 'LBX189LA', | 'LBXPHF',   | 'LBXTT4',   |
| 'LBXHPELA',  | 'LBX194',   | 'LBXPHE',   | 'LBXSF1',   |
| 'LBXHXC',    | 'LBX194LA', | 'LBXZEA',   | 'LBXSF2',   |
| 'LBXHXCCLA', | 'LBX195',   | 'LBXACR',   | 'LBXVIDMS', |
| 'LBXMIR',    | 'LBX195LA', | 'LBXGLY',   | 'LBXVD2MS', |
| 'LBXMIRLA',  | 'LBX196',   | 'LBXS06MK', | 'LBXVD3MS', |
| 'LBXODT',    | 'LBX196LA', | 'LBXS11MK', | 'LBXVE3MS', |
| 'LBXODTLA',  | 'LBX206',   | 'LBXS16MK', | 'LBX06',    |
| 'LBXOXY',    | 'LBX206LA', | 'LBXS18MK', | 'LBX11',    |
| 'LBXOXYLA',  | 'LBXDIE',   | 'LBXIGE',   | 'LBX16',    |
| 'LBXPDE',    | 'LBXDIELA', | 'LBXID2',   | 'LBX18',    |
| 'LBXPDELA',  | 'LBXALD',   | 'LBXID1',   | 'LBXMEA',   |
| 'LBXPDT',    | 'LBXALDLA', | 'LBXIE1',   | 'LBXMUM',   |
| 'LBXPDTLA',  | 'LBXEND',   | 'LBXIE5',   | 'LBXRUB',   |
| 'LBXTNA',    | 'LBXENDLA', | 'LBXII6',   | 'LBXTTG',   |
| 'LBXTNALA',  | 'LBXMS1',   | 'LBXIM6',   | 'LBXSCK',   |
| 'LBXBHC',    | 'LBXM1',    | 'LBXF13',   | 'LBXSCU',   |
| 'LBXBHCLA',  | 'LBXSY1',   | 'LBXIF1',   | 'LBXSSE',   |
| 'LBXEPAH',   | 'LBXV1A',   | 'LBXIF2',   | 'LBXSZN',   |
| 'LBXMPAH',   | 'LBXV1D',   | 'LBXIW1',   | 'LBXSF3',   |
| 'LBXPFDE',   | 'LBXV1E',   | 'LBXIG5',   | 'LBXSF4',   |
| 'LBXPFDO',   | 'LBXV2A',   | 'LBXIG2',   | 'LBXSF5',   |
| 'LBXPFHP',   | 'LBXV2C',   | 'LBXIT7',   | 'LBXSF6',   |
| 'LBXPFHS',   | 'LBXV2T',   | 'LBXIT3',   | 'LBXBGE',   |
| 'LBXPFNA',   | 'LBXV3B',   | 'LBXF24',   | 'LBXBGM',   |
| 'LBXPFOA',   | 'LBXVCB',   | 'LBXIM3',   | 'LBXBSE',   |
| 'LBXPFOS',   | 'LBXVDM',   | 'LBXW11',   | 'LBXBMN',   |
| 'LBXPFSA',   | 'LBXVDP',   | 'LBXE72',   | 'LBXTBA',   |
| 'LBXPFUA',   | 'LBXVHE',   | 'LBXE74',   | 'LBXTBN',   |
| 'LBXVID',    | 'LBXVMC',   | 'LBXGLT',   | 'LBXTBIN',  |
| 'LBXALC',    | 'LBX2DF',   | 'LBXAPB',   | 'LBXTBM',   |
| 'LBXBEC',    | 'LBXV2P',   | 'LBXVTE',   | 'LBXTST',   |
| 'LBXCBC',    | 'LBXVNB',   | 'LBXDWT',   | 'LBXEST',   |
| 'LBXCRY',    | 'LBXTFR',   | 'LBXDWS',   | 'LBXSHBG'   |
